# Supplementary material
Source: PubMed Central journal article supplement (PMC3131693)

Supporting Information

© Wiley-VCH 2011

69451 Weinheim, Germany

**Synthesis of Highly Functionalized Cyclohexenone Rings: Rhodium-Catalyzed 1,3-Acyloxy Migration and Subsequent [5+1] Cycloaddition\*\***

*Dongxu Shu, Xiaoxun Li, Min Zhang, Patrick J. Robichaux, and Weiping Tang\**

anie\_201006881\_sm\_miscellaneous\_information.pdf

### General remarks:

All reactions in non-aqueous media were conducted under a positive pressure of dry argon or carbonmonoxide in glassware that had been oven dried prior to use unless noted otherwise. Anhydrous solutions of reaction mixtures were transferred via an oven dried syringe or cannula. All solvents were dried prior to use unless noted otherwise. Reagents were purchased from Aldrich, Acros, TCI, or Alfa unless otherwise noted. Thin layer chromatography was performed using precoated silica gel plates (EMD Chemical Inc. 60,F254). Flash column chromatography was performed with silica gel (Sillicycle, 40-63 $\mu$ m). Infrared spectra (IR) were obtained as neat oils on a Bruker Equinox 55Spectrophotometer.  $^1\text{H}$  and  $^{13}\text{C}$  Nuclear magnetic resonance spectra (NMR) were obtained on a Varian Unity-Inova 400 MHz or 500 MHz recorded in ppm ( $\delta$ ) downfield of TMS ( $\delta = 0$ ) in  $\text{CDCl}_3$  or  $\text{CD}_3\text{OD}$ . Signal splitting patterns were described as singlet (s), doublet (d), triplet (t), quartet (q), quintet (quint), or multiplet (m), with coupling constants ( $J$ ) in hertz. High resolution mass spectra (HRMS) were performed by Analytical Instrument Center at the School of Pharmacy or Department of Chemistry on an Electron Spray Injection (ESI) mass spectrometer. Enantiomeric excess was determined by chiral HPLC analysis. The optical rotation was determined by Perkin-Elmer 241 Polarimeter.

### General Procedures for the preparation of substrates:

Substrates **11a-g** were synthesized according to Scheme 1.<sup>1,2</sup> More substituted substrates were generally synthesized from allylic alcohols via cyclopropanation<sup>3</sup>, oxidation, and Seyfurth-Gilbert Homologation<sup>4</sup> according to Scheme 2.

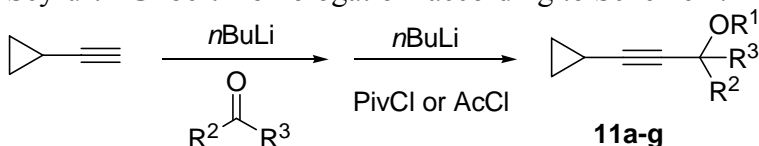

Scheme 1. Synthesis of Substrates 11a-g

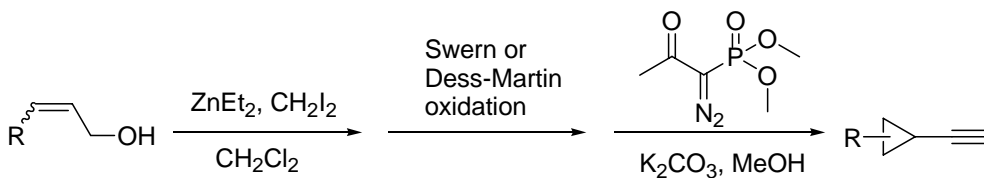

Scheme 2. Synthesis of Substituted Cyclopropyl Alkynes

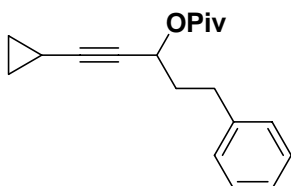

**2,2-Dimethyl-propionic acid 3-cyclopropyl-1-phenethyl-prop-2-ynyl ester (11a).**  $^1\text{H}$  NMR (500 MHz,  $\text{CDCl}_3$ , TMS):  $\delta$  0.68 (m, 2H), 0.77 (m, 2H), 1.21 (s, 9H), 1.26 (m, 1H), 2.03 (m, 2H), 2.73 (m, 2H), 5.32 (td,  $J = 5.2, 1.5$  Hz, 1H), 7.18 (m, 3H), 7.27 (m, 2H).  $^{13}\text{C}$  NMR (125 MHz,  $\text{CDCl}_3$ ):  $\delta$  -0.3, 8.58, 8.59, 27.2, 31.6, 36.9, 38.9, 63.9, 72.9, 89.5, 126.2, 128.61, 128.67, 141.3, 177.5. IR (film):  $\nu$  2963, 2246, 1731, 1479, 1455, 1366,

1278, 1146, 1030, 911  $\text{cm}^{-1}$ . HRMS (ESI)  $m/z$  calcd. For  $\text{C}_{19}\text{H}_{24}\text{NaO}_2$  ( $\text{M}+\text{Na}$ )<sup>+</sup> 307.1668, found 307.1666.

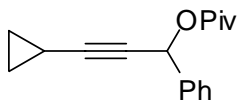

**3-cyclopropyl-1-phenylprop-2-ynyl pivalate (11b).**  $^1\text{H}$  NMR (400 MHz,  $\text{CDCl}_3$ , TMS):  $\delta$  0.71 (m, 2 H), 0.78 (m, 2 H), 1.20 (s, 9H), 1.30 (m, 1 H), 6.40 (d,  $J=1.7$  Hz, 1 H), 7.34 (m, 3 H), 7.46 (m, 2 H).  $^{13}\text{C}$  NMR (100 MHz,  $\text{CDCl}_3$ ):  $\delta$  0.0, 8.8, 27.4, 39.1, 66.1, 72.5, 91.3, 127.6, 128.78, 128.82, 138.4, 177.6. IR:  $\nu$  2976, 2362, 2342, 1732, 1271, 1137  $\text{cm}^{-1}$ . HRMS (ESI) for  $\text{C}_{17}\text{H}_{20}\text{NaO}_2$  ( $\text{M}+23$ ) 279.1356 (Calc.), found 279.1361.

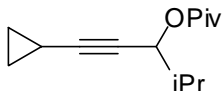

**1-cyclopropyl-4-methylpent-1-yn-3-yl pivalate (11c).**  $^1\text{H}$  NMR (400 MHz,  $\text{CDCl}_3$ , TMS):  $\delta$  0.66 (m, 2H), 0.75 (m, 2H), 0.97 (d,  $J = 6.9$  Hz, 6H), 1.21 (s, 9H), 1.26 (m, 1H), 1.93 (m, 1H), 5.14 (dd,  $J = 5.6, 1.7$  Hz, 1H).  $^{13}\text{C}$  NMR (100 MHz,  $\text{CDCl}_3$ ):  $\delta$  0.0, 8.85, 18.2, 18.6, 27.6, 33.2, 39.3, 69.6, 72.1, 89.8, 177.9. IR:  $\nu$  2968, 2362, 2343, 1781, 1281, 1147  $\text{cm}^{-1}$ . HRMS (ESI) for  $\text{C}_{14}\text{H}_{22}\text{O}_2$  ( $\text{M}+1$ ) 223.1693 (Calc.), found 223.1691.

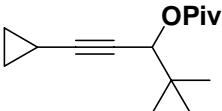

**2,2-Dimethyl-propionic acid 1-tert-butyl-3-cyclopropyl-prop-2-ynyl ester (11d).**  $^1\text{H}$  NMR (500 MHz,  $\text{CDCl}_3$ , TMS):  $\delta$  0.65 (m, 2H), 0.75 (m, 2H), 0.97 (s, 9H), 1.22 (s, 9H), 1.23 (m, 1H), 5.00 (d,  $J = 1.5$  Hz, 1H).  $^{13}\text{C}$  NMR (100 MHz,  $\text{CDCl}_3$ ):  $\delta$  -0.3, 8.5, 25.8, 27.2, 35.5, 39.1, 71.7, 72.2, 89.3, 177.5. IR (film):  $\nu$  2972, 2245, 1733, 1147  $\text{cm}^{-1}$ . HRMS (ESI)  $m/z$  calcd. For  $\text{C}_{15}\text{H}_{24}\text{NaO}_2$  ( $\text{M}+\text{Na}$ )<sup>+</sup> 259.1668, found 259.1669.

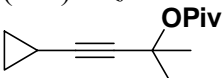

**2,2-Dimethyl-propionic acid 3-cyclopropyl-1,1-dimethyl-prop-2-ynyl ester (11e).**  $^1\text{H}$  NMR (500 MHz,  $\text{CDCl}_3$ , TMS):  $\delta$  0.65 (m, 2H), 0.73 (m, 2H), 1.16 (s, 9H), 1.24 (m, 1H), 1.59 (s, 6H).  $^{13}\text{C}$  NMR (125 MHz,  $\text{CDCl}_3$ ):  $\delta$  -0.2, 8.8, 27.5, 29.7, 39.5, 72.5, 77.0, 87.7, 177.1. IR (film):  $\nu$  2980, 2240, 1732, 1117, 912, 856, 812  $\text{cm}^{-1}$ . HRMS (ESI)  $m/z$  calcd. For  $\text{C}_{13}\text{H}_{20}\text{NaO}_2$  ( $\text{M}+\text{Na}$ )<sup>+</sup> 231.1355, found 231.1360.

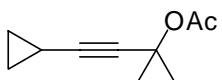

**4-cyclopropyl-2-methylbut-3-yn-2-yl acetate (11f).**  $^1\text{H}$  NMR (400 MHz,  $\text{CDCl}_3$ , TMS):  $\delta$  0.63 (m, 2H), 0.71 (m, 2H), 1.21 (m, 1H), 1.58 (s, 6H), 1.96 (s, 3H).  $^{13}\text{C}$  NMR (100 MHz,  $\text{CDCl}_3$ ):  $\delta$  0.0, 8.9, 22.7, 29.8, 73.1, 77.0, 88.2, 169.9. IR:  $\nu$  2942, 2361, 2343, 1743, 1365, 1266, 1243, 1138, 1123  $\text{cm}^{-1}$ . HRMS (ESI) for  $\text{C}_{10}\text{H}_{14}\text{NaO}_2$  ( $\text{M}+\text{Na}$ )<sup>+</sup> 189.0886 (Calc.), found 189.0885.

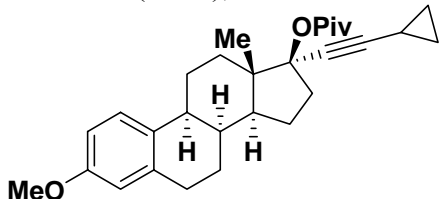

**2,2-Dimethyl-propionic acid 17-cyclopropylethynyl-3-methoxy-13-methyl-7,8,9,11,12,13,14,15,16,17-decahydro-6H-cyclopenta[a]phenanthren-17-yl ester (11g).**

$^1\text{H}$  NMR (400 MHz,  $\text{CDCl}_3$ , TMS):  $\delta$  0.66 (m, 2H), 0.76 (m, 2H), 0.89 (s, 9H), 1.29 (m, 2H), 1.42 (m, 2H), 1.69 (m, 1H), 1.80 (m, 2H), 1.90 (m, 1H), 1.99 (m, 2H), 2.23 (m, 1H), 2.36 (m, 1H), 2.70 (ddd,  $J = 15.2, 9.6, 6.0$  Hz, 1H), 2.86 (m, 2H), 3.78 (s, 3H), 6.64 (d,  $J = 3.5$  Hz, 1H), 6.72 (dd,  $J = 8.8, 2.8$  Hz, 1H), 7.23 (d,  $J = 8.8$  Hz, 1H).  $^{13}\text{C}$  NMR (100 MHz,  $\text{CDCl}_3$ ):  $\delta$  -0.1, 8.83, 8.85, 13.9, 23.6, 26.6, 27.3, 27.6, 30.1, 33.6, 37.6, 39.3, 39.4, 43.8, 48.1, 48.5, 55.4, 75.0, 84.9, 90.2, 111.7, 114.0, 126.6, 132.7, 126.6, 132.7, 138.1, 157.7, 176.8. IR (film):  $\nu$  2937, 2243, 1733, 1500, 1156, 1029, 908, 729  $\text{cm}^{-1}$ . HRMS (ESI)  $m/z$  calcd. For  $\text{C}_{29}\text{H}_{38}\text{NaO}_3$  ( $\text{M}+\text{Na}$ ) $^+$  457.2713, found 457.2714.  $[\alpha]_{\text{D}}^{25} = -108.6$  ( $c$  1,  $\text{CHCl}_3$ ).

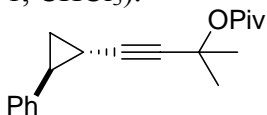

**2,2-Dimethyl-propionic acid 1,1-dimethyl-3-(2-phenyl-cyclopropyl)-prop-2-ynyl ester (14).**  $^1\text{H}$  NMR (500 MHz,  $\text{CDCl}_3$ , TMS):  $\delta$  1.18 (s, 9H), 1.20 (m, 1H), 1.28 (m, 1H), 1.53 (ddd,  $J = 6.8, 5.5, 4.5$  Hz, 1H), 1.62 (s, 6H), 2.20 (ddd,  $J = 7.2, 6.0, 4.5$  Hz, 1H), 7.06 (m, 2H), 7.16 (m, 1H), 7.26 (m, 2H).  $^{13}\text{C}$  NMR (100 MHz,  $\text{CDCl}_3$ ):  $\delta$  11.5, 18.3, 26.5, 27.3, 29.3, 29.4, 39.2, 72.2, 78.1, 86.0, 126.0, 126.3, 128.5, 141.1, 176.9. IR (film):  $\nu$  2981, 2246, 1733, 1479, 1285, 1172, 1117, 860, 748, 697  $\text{cm}^{-1}$ . HRMS (ESI)  $m/z$  calcd. For  $\text{C}_{19}\text{H}_{24}\text{NaO}_2$  ( $\text{M}+\text{Na}$ ) $^+$  307.1668, found 307.1678.

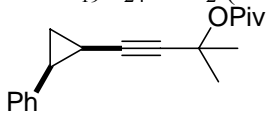

**2,2-Dimethyl-propionic acid 1,1-dimethyl-3-(2-phenyl-cyclopropyl)-prop-2-ynyl ester (17).**  $^1\text{H}$  NMR (400 MHz,  $\text{CDCl}_3$ , TMS):  $\delta$  1.11 (s, 9H), 1.16 (ddd,  $J = 7.2, 6.4, 5.6$  Hz, 1H), 1.32 (td,  $J = 8.4, 5.2$  Hz, 1H), 1.39 (s, 6H), 1.78 (td,  $J = 8.4, 6.0$  Hz, 1H), 2.27 (td,  $J = 8.4, 6.8$  Hz, 1H), 7.16-7.29 (m, 5H).  $^{13}\text{C}$  NMR (100 MHz,  $\text{CDCl}_3$ ):  $\delta$  9.7, 15.0, 23.8, 27.2, 28.9, 29.1, 39.2, 72.0, 81.3, 83.8, 126.2, 127.8, 128.6, 138.3, 176.7. IR (film):  $\nu$  1735, 1288, 1119, 911, 698  $\text{cm}^{-1}$ . HRMS (ESI)  $m/z$  calcd. For  $\text{C}_{19}\text{H}_{24}\text{NaO}_2$  ( $\text{M}+\text{Na}$ ) $^+$  307.1668, found 307.1682.

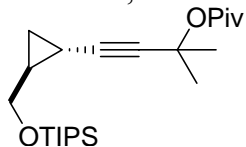

**2,2-Dimethyl-propionic acid 1,1-dimethyl-3-(2-triisopropylsilyloxymethyl-cyclopropyl)-prop-2-ynyl ester (18).**  $^1\text{H}$  NMR (400 MHz,  $\text{CDCl}_3$ , TMS):  $\delta$  0.80 (m, 2H), 1.04 (m, 21H), 1.16 (s, 9H), 1.39 (s, 6H), 1.26 (m, 1H), 1.31 (m, 1H), 1.60 (s, 6H), 3.66 (dd,  $J = 10.4, 4.8$  Hz, 1H), 3.72 (dd,  $J = 10.4, 4.4$  Hz, 1H).  $^{13}\text{C}$  NMR (100 MHz,  $\text{CDCl}_3$ ):  $\delta$  3.8, 12.2, 12.5, 18.1, 24.2, 27.2, 29.41, 29.42, 39.2, 63.6, 72.3, 76.9, 86.8, 176.8. IR (film):  $\nu$  2943, 2244, 1736, 1462, 1286, 1116, 881, 796, 681  $\text{cm}^{-1}$ . HRMS (ESI)  $m/z$  calcd. For  $\text{C}_{23}\text{H}_{42}\text{SiNaO}_3$  ( $\text{M}+\text{Na}$ ) $^+$  417.2795, found 417.2798.

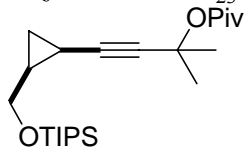

**2,2-Dimethyl-propionic acid 1,1-dimethyl-3-(2-triisopropylsilyloxyethyl-cyclopropyl)-prop-2-ynyl ester (21).**  $^1\text{H}$  NMR (500 MHz,  $\text{CDCl}_3$ , TMS):  $\delta$  0.53 (ddd,  $J = 5.5, 5.5, 5.5$  Hz, 1H), 0.98 (m, 1H), 1.08 (m, 21H), 1.16 (s, 9H), 1.27 (m, 1H), 1.46 (m, 1H), 1.59 (s, 6H), 3.62 (dd,  $J = 10.5, 7.0$  Hz, 1H), 3.94 (dd,  $J = 10.5, 6.0$  Hz, 1H).  $^{13}\text{C}$  NMR (125 MHz,  $\text{CDCl}_3$ ):  $\delta$  4.8, 12.2, 12.5, 13.5, 18.2, 20.6, 27.2, 29.2, 29.3, 39.1, 64.7, 72.1, 79.1, 84.0, 176.5. IR (film):  $\nu$  2944, 2868, 1736, 1463, 1286, 1129, 883, 772, 682  $\text{cm}^{-1}$ . HRMS (ESI)  $m/z$  calcd. For  $\text{C}_{23}\text{H}_{42}\text{SiNaO}_3$  ( $\text{M}+\text{Na}$ ) $^+$  417.2795, found 417.2803.

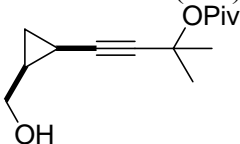

**2,2-Dimethyl-propionic acid 3-(2-hydroxymethyl-cyclopropyl)-1,1-dimethyl-prop-2-ynyl ester (22).**  $^1\text{H}$  NMR (400 MHz,  $\text{CDCl}_3$ , TMS):  $\delta$  0.60 (ddd,  $J = 5.2, 5.2, 5.2$  Hz, 1H), 0.96 (td,  $J = 7.6, 4.8$  Hz, 1H), 1.17 (s, 9H), 1.43 (m, 2H), 1.60 (s, 6H), 2.88 (s, 1H), 3.45 (dd,  $J = 11.6, 8.4$  Hz, 1H), 3.99 (d,  $J = 12.8$  Hz, 1H).  $^{13}\text{C}$  NMR (100 MHz,  $\text{CDCl}_3$ ):  $\delta$  4.5, 12.6, 21.2, 27.2, 28.8, 29.5, 39.4, 63.5, 72.1, 78.5, 84.9, 177.9. IR (film):  $\nu$  2985, 2244, 1723, 1129, 915  $\text{cm}^{-1}$ . HRMS (ESI)  $m/z$  calcd. For  $\text{C}_{14}\text{H}_{22}\text{NaO}_3$  ( $\text{M}+\text{Na}$ ) $^+$  261.1461, found 261.1473.

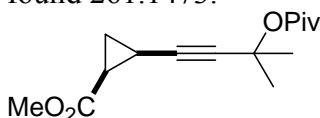

**2-[3-(2,2-Dimethyl-propionyloxy)-3-methyl-but-1-ynyl]-cyclopropanecarboxylic acid methyl ester (24).**  $^1\text{H}$  NMR (400 MHz,  $\text{CDCl}_3$ , TMS):  $\delta$  1.17 (s, 9H), 1.19 (m, 1H), 1.41 (ddd,  $J = 6.8, 6.4, 4.8$  Hz, 1H), 1.59 (s, 3H), 1.60 (s, 3H), 1.81 (td,  $J = 8.8, 7.2$  Hz, 1H), 1.93 (ddd,  $J = 8.4, 7.6, 6.0$  Hz, 1H), 3.72 (s, 3H).  $^{13}\text{C}$  NMR (100 MHz,  $\text{CDCl}_3$ ):  $\delta$  9.5, 14.5, 21.5, 27.2, 29.1, 29.3, 39.2, 51.9, 71.9, 80.5, 81.4, 170.6, 176.8. IR (film):  $\nu$  2981, 2245, 1732, 1197, 1074  $\text{cm}^{-1}$ . HRMS (ESI)  $m/z$  calcd. For  $\text{C}_{15}\text{H}_{22}\text{NaO}_4$  ( $\text{M}+\text{Na}$ ) $^+$  289.1410, found 261.1424.

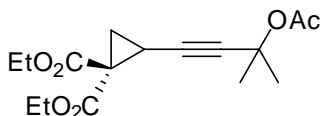

**Diethyl 2-(3-acetoxy-3-methylbut-1-ynyl)cyclopropane-1,1-dicarboxylate (26).**  $^1\text{H}$  NMR (400 MHz,  $\text{CDCl}_3$ , TMS):  $\delta$  1.24 (t,  $J = 8.0$  Hz, 3H), 1.31 (t,  $J = 8.0$  Hz, 3H), 1.53 (dd,  $J = 9.2, 4.5$  Hz, 1H), 1.56 (s, 6H), 1.77 (dd,  $J = 7.2, 4.5$  Hz, 1H), 1.97 (s, 3H), 2.46 (dd,  $J = 9.2, 7.2$  Hz, 1H), 4.21 (m, 4H).  $^{13}\text{C}$  NMR (100 MHz,  $\text{CDCl}_3$ ):  $\delta$  14.2, 14.3, 16.7, 22.1, 29.2, 36.4, 61.9, 62.1, 72.1, 80.4, 81.5, 166.5, 168.9, 169.4. IR:  $\nu$  2986, 2359, 2344, 1733, 1371, 1321, 1243, 1202, 1137, 1017  $\text{cm}^{-1}$ . HRMS (ESI) for  $\text{C}_{16}\text{H}_{22}\text{NaO}_6$  ( $\text{M}+\text{Na}$ ) $^+$  333.1309 (Calc.), found 333.1316.

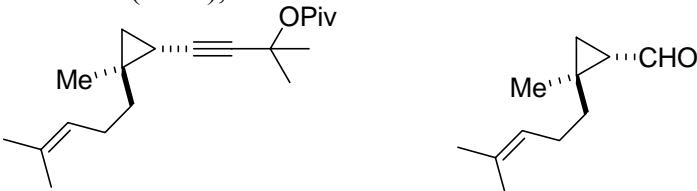

**2,2-Dimethyl-propionic acid 1,1-dimethyl-3-[2-methyl-2-(4-methyl-pent-3-enyl)-cyclopropyl]-prop-2-ynyl ester (28).**  $^1\text{H}$  NMR (500 MHz,  $\text{CDCl}_3$ , TMS):  $\delta$  0.46 (dd,  $J =$

5.0, 5.0 Hz, 1H), 0.73 (dd,  $J = 9.0, 4.0$  Hz, 1H), 1.11 (dd,  $J = 8.5, 5.0$  Hz, 1H), 1.16 (s, 9H), 1.16 (s, 3H), 1.17-1.31 (m, 2H), 1.60 (s, 3H), 1.62 (s, 6H), 1.67 (s, 3H), 2.03 (m, 2H), 5.07 (t,  $J = 7.0$  Hz, 1H).  $^{13}\text{C}$  NMR (125 MHz,  $\text{CDCl}_3$ ):  $\delta$  13.4, 17.8, 18.8, 22.7, 23.4, 25.5, 25.9, 27.3, 29.5, 29.6, 39.3, 40.1, 72.5, 79.2, 85.5, 124.5, 131.6, 176.8. IR (film):  $\nu$  2969, 2238, 1736, 1286, 1172, 1114  $\text{cm}^{-1}$ . HRMS (ESI)  $m/z$  calcd. For  $\text{C}_{20}\text{H}_{32}\text{NaO}_2$  ( $\text{M}+\text{Na}$ ) $^+$  327.2945, found 327.2305.  $[\alpha]_{\text{D}}^{25} = +73.8$  ( $c$  1,  $\text{CHCl}_3$ ). The enantiomeric excess (87%) of substrate **28** was determined by HPLC analysis of the precursor aldehyde shown above. (Chiralcel OJ-H; eluent: pure hexane; flow rate: 0.7 mL/min; detection: at 210 nm): retention times  $t_1 = 20.2$  min  $t_2 = 23.8$  min. Compound **28** was prepared according to general procedures in Schemes 1 and 2. The enantioselective cyclopropanation was conducted according to literature procedure.<sup>5</sup>

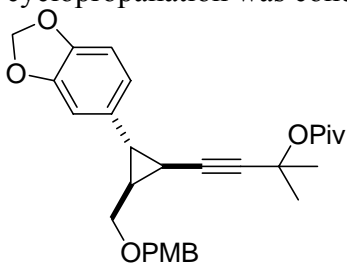

**2,2-Dimethyl-propionic acid 3-[2-benzo[1,3]dioxol-5-yl-3-(4-methoxybenzyloxymethyl)-cyclopropyl]-1,1-dimethyl-prop-2-ynyl ester (30).**  $^1\text{H}$  NMR (400 MHz,  $\text{CDCl}_3$ , TMS):  $\delta$  1.17 (s, 9H), 1.61 (s, 6H), 1.65 (m, 1H), 1.71 (dd,  $J = 8.4, 5.2$  Hz, 1H), 1.96 (t,  $J = 5.2$  Hz, 1H), 3.70 (dd,  $J = 6.0, 1.6$  Hz, 2H), 3.79 (s, 3H), 4.48 (d,  $J = 10.4$  Hz, 1H), 4.56 (d,  $J = 10.4$  Hz, 1H), 5.90 (s, 2H), 6.52 (d,  $J = 2.0$  Hz, 1H), 6.56 (dd,  $J = 8.0, 1.6$  Hz, 1H), 6.69 (d,  $J = 8.0$  Hz, 1H), 6.87 (m, 2H), 7.30 (m, 2H).  $^{13}\text{C}$  NMR (100 MHz,  $\text{CDCl}_3$ ):  $\delta$  16.1, 27.3, 27.6, 29.3, 31.1, 39.3, 55.5, 70.1, 72.1, 72.7, 80.8, 82.7, 101.1, 106.8, 108.3, 114.0, 119.7, 129.6, 130.9, 134.1, 146.3, 147.9, 159.4, 176.8. IR (film):  $\nu$  1731, 1513, 1250, 1038, 756  $\text{cm}^{-1}$ . HRMS (ESI)  $m/z$  calcd. For  $\text{C}_{29}\text{H}_{34}\text{NaO}_6$  ( $\text{M}+\text{Na}$ ) $^+$  501.2247, found 501.2246.

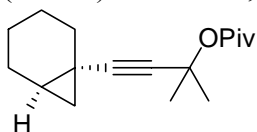

**4-((1R,6R)-bicyclo[4.1.0]heptan-1-yl)-2-methylbut-3-yn-2-yl pivalate (32).**  $^1\text{H}$  NMR (400 MHz,  $\text{CDCl}_3$ , TMS):  $\delta$  0.48 (m, 1H), 0.90 (m, 2H), 1.10 (m, 1H), 1.15 (s, 9H), 1.23 (m, 3H), 1.52 (m, 1H), 1.57 (s, 3H), 1.58 (s, 3H), 1.85 (m, 1H), 1.92 (m, 2H).  $^{13}\text{C}$  NMR (100 MHz,  $\text{CDCl}_3$ ):  $\delta$  10.1, 20.4, 20.5, 21.2, 23.4, 27.3, 29.5, 29.6, 39.3, 72.5, 76.2, 92.2, 176.8. IR:  $\nu$  2976, 2935, 2863, 2364, 2234, 1733, 1285, 1172, 1120  $\text{cm}^{-1}$ . HRMS (ESI) for  $\text{C}_{17}\text{H}_{26}\text{O}_2$  ( $\text{M}+1$ ) 263.2006 (Calc.), found 263.2002.

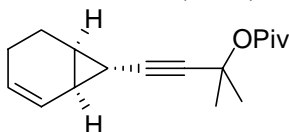

**4-((1S,6R,7S)-bicyclo[4.1.0]hept-2-en-7-yl)-2-methylbut-3-yn-2-yl pivalate (34).**  $^1\text{H}$  NMR (400 MHz,  $\text{CDCl}_3$ , TMS):  $\delta$  1.17 (s, 9H), 1.27 (d,  $J = 1.0$  Hz, 1H), 1.46 (m, 1H), 1.51 (m, 1H), 1.60 (s, 6H), 1.61 (m, 1H), 1.71 (m, 1H), 2.00 (m, 2H), 5.46 (m, 1H), 6.01 (m, 1H).  $^{13}\text{C}$  NMR (100 MHz,  $\text{CDCl}_3$ ):  $\delta$  12.2, 17.9, 20.8, 22.1, 24.9, 26.7, 27.3, 29.4, 39.3, 72.3, 78.3, 86.1, 124.4, 126.4, 176.9. IR:  $\nu$  2983, 2935, 2806, 2360, 2244, 1734,

1172, 1126, 1098  $\text{cm}^{-1}$ . HRMS (ESI) for  $\text{C}_{17}\text{H}_{24}\text{O}_2$  ( $\text{M}+1$ ) 261.1849 (Calc.), found 261.1846.

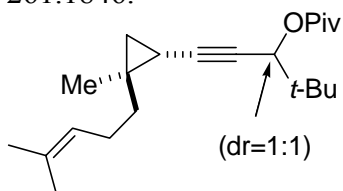

**2,2-Dimethyl-propionic acid 1-tert-butyl-3-[2-methyl-2-(4-methyl-pent-3-enyl)-cyclopropyl]-prop-2-ynyl ester (36, 1:1 diastereoisomers).**  $^1\text{H}$  NMR (500 MHz,  $\text{CDCl}_3$ , TMS):  $\delta$  0.45 (dd,  $J = 4.5, 4.5\text{Hz}$ , 1H), 0.74 (dd,  $J = 8.5, 4.0\text{Hz}$ , 1H), 0.99 (s, 9H), 1.13 (m, 1H), 1.16 (m, 3H), 1.21 (s, 9H), 1.23 (m, 2H), 1.60 (s, 3H), 1.67 (s, 3H), 2.04 (m, 2H), 5.04 (d,  $J = 2.0\text{Hz}$ , 1H), 5.07 (t,  $J = 7.0\text{Hz}$ , 1H).  $^{13}\text{C}$  NMR (125 MHz,  $\text{CDCl}_3$ ):  $\delta$  13.5, 17.8, 19.1, 19.1, 22.73, 22.76, 23.37, 23.43, 25.5, 25.92, 25.94, 25.96, 27.3, 35.56, 35.60, 39.1, 40.03, 40.05, 72.50, 72.57, 74.2, 87.32, 87.37, 124.4, 131.7, 177.5. IR (film):  $\nu$  2973, 2239, 1735, 1479, 1279, 1150, 1032  $\text{cm}^{-1}$ . HRMS (ESI)  $m/z$  calcd. For  $\text{C}_{22}\text{H}_{36}\text{NaO}_2$  ( $\text{M}+\text{Na}$ ) $^+$  355.2607, found 355.2610.

### General Procedure for the rhodium catalyzed tandem 1,3-acyl migration followed by [5+1] cycloaddition.

To an oven-dried flask was added  $[\text{Rh}(\text{CO})_2\text{Cl}]_2$  (0.005mmol) and anhydrous toluene (1ml) under an CO atmosphere, cyclopropyl propargyl ester (0.1 mmol) was added and the oil bath was heated to 60  $^\circ\text{C}$ . The reaction was monitored by TLC. After completion of the reaction, the solvent was evaporated and the residue was further purified by flash chromatography.

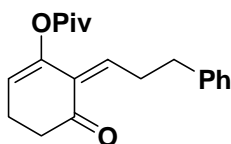

**(Z)-2,2-Dimethyl-propionic acid 5-oxo-6-(3-phenyl-propylidene)-cyclohex-1-enyl ester (12a).**  $^1\text{H}$  NMR (500 MHz,  $\text{CDCl}_3$ , TMS):  $\delta$  1.23 (s, 9H), 2.49 (td,  $J = 6.5, 5.0\text{Hz}$ , 2H), 2.60 (t,  $J = 7.0\text{Hz}$ , 2H), 2.75 (t,  $J = 7.5\text{Hz}$ , 2H), 2.97 (dt,  $J = 7.5, 7.5\text{Hz}$ , 2H), 5.58 (t, 5.0Hz, 1H), 5.92 (t,  $J = 7.5\text{Hz}$ , 1H), 7.17 (m, 3H), 7.26 (m, 2H).  $^{13}\text{C}$  NMR (125 MHz,  $\text{CDCl}_3$ ):  $\delta$  21.3, 27.3, 30.5, 35.5, 39.2, 39.8, 115.6, 126.1, 128.5, 128.7, 129.6, 137.1, 141.2, 146.0, 176.4, 199.3. IR (film):  $\nu$  2972, 1753, 1702, 1373, 1119, 914, 700  $\text{cm}^{-1}$ . HRMS (ESI)  $m/z$  calcd. For  $\text{C}_{20}\text{H}_{24}\text{NaO}_3$  ( $\text{M}+\text{Na}$ ) $^+$  335.1617, found 335.1632.

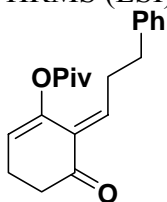

**(E)-2,2-Dimethyl-propionic acid 5-oxo-6-(3-phenyl-propylidene)-cyclohex-1-enyl ester (12a).**  $^1\text{H}$  NMR (400 MHz,  $\text{CDCl}_3$ , TMS):  $\delta$  1.22 (s, 9H), 2.45 (td,  $J = 6.0, 5.2\text{Hz}$ , 2H), 2.59 (t,  $J = 6.0\text{Hz}$ , 2H), 2.68 (dt,  $J = 7.6, 7.6\text{Hz}$ , 2H), 2.77 (t,  $J = 7.2\text{Hz}$ , 2H), 5.63 (t,  $J = 5.2\text{Hz}$ , 1H), 6.70 (t,  $J = 7.6\text{Hz}$ , 1H), 7.17 (m, 3H), 7.26 (m, 2H).  $^{13}\text{C}$  NMR (100 MHz,  $\text{CDCl}_3$ ):  $\delta$  20.4, 27.3, 30.7, 35.4, 37.1, 39.2, 118.5, 126.3, 128.4, 128.6, 129.7,

137.7, 141.0, 147.0, 177.0, 198.4. IR (film):  $\nu$  2971, 1751, 1705, 1266, 1120, 914, 735  $\text{cm}^{-1}$ . HRMS (ESI)  $m/z$  calcd. For  $\text{C}_{20}\text{H}_{24}\text{NaO}_3$  ( $\text{M}+\text{Na}$ )<sup>+</sup> 335.1617, found 335.1614.

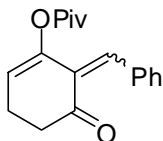

**(E/Z)-6-benzylidene-5-oxocyclohex-1-enyl pivalate (12b).** <sup>1</sup>H NMR (400 MHz,  $\text{CDCl}_3$ , TMS): For *E*-isomer:  $\delta$  0.76 (s, 9H), 2.53 (m, 2H), 2.63 (t,  $J = 6.2$  Hz, 2H), 5.87 (td,  $J = 5.3, 1.2$  Hz, 1H, one isomer), 7.31 (m, 4H), 7.43 (m, 1H), 7.58 (s, 1H). For *Z*-isomer:  $\delta$  1.35 (s, 9H), 2.58 (m, 2H), 2.73 (t,  $J = 6.4$  Hz, 2H), 5.73 (t,  $J = 4.5$  Hz, 1H), 6.67 (s, 1H), 7.31 (m, 4H), 7.43 (m, 1H). <sup>13</sup>C NMR (100 MHz,  $\text{CDCl}_3$ ):  $\delta$  20.2, 26.7, 36.7, 40.3, 120.3, 128.2, 129.1, 130.4, 131.6, 134.2, 135.4, 146.5, 176.4, 199.5. IR:  $\nu$  2975, 2361, 2342, 1749, 1702, 1162, 1112  $\text{cm}^{-1}$ . HRMS (ESI) for  $\text{C}_{18}\text{H}_{20}\text{O}_3$  ( $\text{M}+1$ ) 285.1485 (Calc.), found 285.1481.

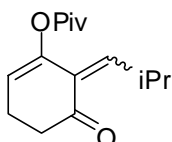

**(E/Z)-6-(2-methylpropylidene)-5-oxocyclohex-1-enyl pivalate (12c).** <sup>1</sup>H NMR (400 MHz,  $\text{CDCl}_3$ , TMS): For *E*-isomer:  $\delta$  0.98 (d,  $J = 6.6$  Hz, 6H), 1.30 (s, 9H), 2.45 (m, 2H), 2.59 (m, 2H), 3.46 (m, 1H), 5.59 (m, 1H), 6.46 (d,  $J = 10.7$  Hz, 1H). For *Z*-isomer:  $\delta$  0.97 (d,  $J = 6.6$  Hz, 6H), 1.28 (s, 9H), 2.45 (m, 2H), 2.59 (m, 2H), 2.96 (m, 1H), 5.58 (m, 1H), 5.70 (d,  $J = 9.7$  Hz, 1H). <sup>13</sup>C NMR (100 MHz,  $\text{CDCl}_3$ ):  $\delta$  20.5, 21.4, 22.7, 22.8, 27.3, 27.4, 27.5, 27.7, 37.3, 39.34, 39.35, 40.0, 115.6, 118.4, 127.0, 127.4, 145.1, 145.2, 146.0, 146.9, 176.4, 177.0, 199.0, 199.3. IR:  $\nu$  2973, 2361, 2342, 1751, 1704, 1114  $\text{cm}^{-1}$ . HRMS (ESI) for  $\text{C}_{15}\text{H}_{22}\text{O}_3$  ( $\text{M}$ ) 251.1642 (Calc.), found 251.1639.

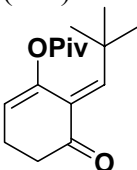

**2,2-Dimethyl-propionic acid 6-(2,2-dimethyl-propylidene)-5-oxo-cyclohex-1-enyl ester (12d).** <sup>1</sup>H NMR (400 MHz,  $\text{CDCl}_3$ , TMS):  $\delta$  1.15 (s, 9H), 1.26 (s, 9H), 2.38 (dt,  $J = 6.0, 6.0$  Hz, 2H), 2.50 (t,  $J = 6.8$  Hz, 2H), 5.74 (td,  $J = 5.2, 1.2$  Hz, 1H), 6.69 (d,  $J = 1.2$  Hz, 1H). <sup>13</sup>C NMR (100 MHz,  $\text{CDCl}_3$ ):  $\delta$  19.7, 27.4, 29.9, 33.2, 35.9, 39.2, 119.0, 129.5, 146.2, 148.9, 177.3, 201.4. IR (film):  $\nu$  2963, 1749, 1703, 1110  $\text{cm}^{-1}$ . HRMS (ESI)  $m/z$  calcd. For  $\text{C}_{16}\text{H}_{24}\text{NaO}_3$  ( $\text{M}+\text{Na}$ )<sup>+</sup> 287.1617, found 287.1615.

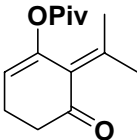

**2,2-Dimethyl-propionic acid 6-isopropylidene-5-oxo-cyclohex-1-enyl ester (12e).** <sup>1</sup>H NMR (400 MHz,  $\text{CDCl}_3$ , TMS):  $\delta$  1.27 (s, 9H),  $\delta$  1.97 (s, 3H),  $\delta$  2.15 (s, 3H),  $\delta$  2.36 (dt,  $J = 6.0, 6.0$  Hz, 2H),  $\delta$  2.51 (t,  $J = 6.4$  Hz, 2H),  $\delta$  5.62 (t,  $J = 5.2$  Hz, 1H). <sup>13</sup>C NMR (125 MHz,  $\text{CDCl}_3$ ):  $\delta$  20.2, 24.3, 25.2, 27.4, 38.5, 39.2, 116.7, 128.6, 146.5, 147.3, 176.6, 201.7. IR (film):  $\nu$  2974, 1747, 1690, 1267, 1149, 1112  $\text{cm}^{-1}$ . HRMS (ESI)  $m/z$  calcd. For  $\text{C}_{14}\text{H}_{20}\text{NaO}_3$  ( $\text{M}+\text{Na}$ )<sup>+</sup> 259.1304, found 259.1302.



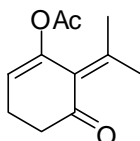

**5-oxo-6-(propan-2-ylidene)cyclohex-1-enyl acetate (12f).**  $^1\text{H}$  NMR (400 MHz,  $\text{CDCl}_3$ , TMS):  $\delta$  1.99 (s, 3H), 2.15 (s, 3H), 2.16 (s, 3H), 2.39 (m, 2H), 2.53 (t,  $J = 6.5$  Hz, 2H), 5.66 (t,  $J = 5.1$  Hz, 1H).  $^{13}\text{C}$  NMR (100 MHz,  $\text{CDCl}_3$ ):  $\delta$  20.5, 21.1, 24.8, 38.9, 117.1, 128.1, 146.4, 146.7, 168.7, 201.4. IR:  $\nu$  2906, 2361, 2342, 1756, 1689, 1205, 1149  $\text{cm}^{-1}$ . HRMS (ESI) for  $\text{C}_{11}\text{H}_{14}\text{O}_3$  ( $\text{M}+1$ ) 195.1016 (Calc.), found 195.1015.

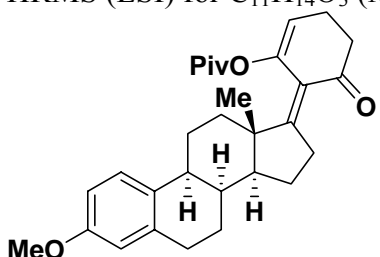

**2,2-Dimethyl-propionic acid 6-(3-methoxy-13-methyl-6,7,8,9,11,12,13,14,15,16-decahydro-cyclopenta[a]phenanthren-17-ylidene)-5-oxo-cyclohex-1-enyl ester (12g).**  $^1\text{H}$  NMR (400 MHz,  $\text{CDCl}_3$ , TMS):  $\delta$  0.96 (s, 3H), 1.27 (s, 9H), 1.28-1.60 (m, 6H), 1.83 (m, 1H), 1.95 (m, 1H), 2.17-2.50 (m, 6H), 2.63 (m, 2H), 2.87 (m, 2H), 3.00 (dd,  $J = 20.8$ , 8.0 Hz, 1H), 3.78 (s, 3H), 5.70 (dd,  $J = 7.2$ , 3.6 Hz, 1H), 6.63 (d,  $J = 2.8$  Hz, 1H), 6.71 (dd,  $J = 8.1$ , 2.8 Hz, 1H),  $\delta$  7.20 (d,  $J = 8.4$  Hz, 1H).  $^{13}\text{C}$  NMR (100 MHz,  $\text{CDCl}_3$ ):  $\delta$  15.8, 19.8, 23.8, 26.9, 27.5, 27.7, 30.0, 32.6, 33.6, 37.2, 38.7, 39.1, 43.6, 47.2, 54.3, 55.4, 111.7, 113.9, 116.6, 124.6, 126.4, 132.6, 138.0, 147.3, 157.7, 164.9, 177.1, 202.9. IR (film):  $\nu$  2937, 1746, 1689, 1500, 1254, 1112, 910, 731  $\text{cm}^{-1}$ . HRMS (ESI)  $m/z$  calcd. For  $\text{C}_{30}\text{H}_{38}\text{NaO}_4$  ( $\text{M}+\text{Na}$ ) $^+$  485.2662, found 457.2656.  $[\alpha]_{\text{D}}^{25} = -48.0$  ( $c$  1,  $\text{CHCl}_3$ ).

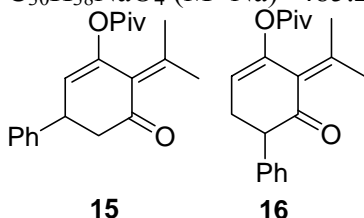

**2,2-Dimethyl-propionic acid 6-isopropylidene-5-oxo-3(4)-phenyl-cyclohex-1-enyl ester (15, 16).**  $^1\text{H}$  NMR (400 MHz,  $\text{CDCl}_3$ , TMS):  $\delta$  1.28 (s, 9H, isomer **15**), 1.29 (s, 9H, isomer **16**), 2.00 (s, 3H, isomer **16**), 2.04 (s, 3H, isomer **15**), 2.05 (s, 3H, isomer **16**), 2.16 (s, 3H, isomer **15**), 2.64-2.86 (m, 2H), 3.74 (t,  $J = 8.0$  Hz, 1H, isomer **16**), 3.84 (m, 1H, isomer **15**), 5.65 (d,  $J = 4.0$  Hz, 1H, isomer **15**), 5.66 (t,  $J = 6.0$  Hz, 1H, isomer **16**), 7.18-7.35 (m, 5H).  $^{13}\text{C}$  NMR (100 MHz,  $\text{CDCl}_3$ ):  $\delta$  24.4, 24.6, 25.0, 25.2, 27.4, 28.6, 38.6, 39.3, 47.8, 54.0, 115.9, 121.0, 127.1, 127.2, 127.4, 128.1, 128.7, 128.7, 129.0, 143.0, 147.1, 147.5, 176.6, 200.0. IR (film):  $\nu$  2976, 1747, 1690, 1271, 1109, 911, 763, 731, 699  $\text{cm}^{-1}$ . HRMS (ESI)  $m/z$  calcd. For  $\text{C}_{20}\text{H}_{24}\text{NaO}_3$  ( $\text{M}+\text{Na}$ ) $^+$  335.1617, found 335.1627.

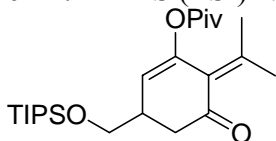

**2,2-Dimethyl-propionic acid 6-isopropylidene-5-oxo-3-triisopropylsilyloxymethyl-cyclohex-1-enyl ester (19).**  $^1\text{H}$  NMR (400 MHz,  $\text{CDCl}_3$ , TMS):  $\delta$  1.04 (m, 21H), 1.23 (s,

9H), 1.97 (s, 3H), 2.14 (s, 3H), 2.45 (dd,  $J = 16.0, 8.0$  Hz, 1H), 2.60 (dd,  $J = 16.0, 5.6$  Hz, 1H), 2.75 (m, 1H), 3.63 (dd,  $J = 9.6, 6.8$  Hz, 1H), 3.68 (dd,  $J = 9.6, 6.4$  Hz, 1H), 5.54 (d,  $J = 4.4$  Hz, 1H).  $^{13}\text{C}$  NMR (100 MHz,  $\text{CDCl}_3$ ):  $\delta$  12.1, 18.1, 24.4, 25.2, 27.3, 35.5, 39.2, 41.9, 66.1, 118.5, 128.4, 146.6, 147.6, 176.5, 200.9. IR (film):  $\nu$  2944, 1752, 1693, 1463, 1107, 882, 734, 684  $\text{cm}^{-1}$ . HRMS (ESI)  $m/z$  calcd. For  $\text{C}_{24}\text{H}_{42}\text{SiNaO}_4$  ( $\text{M}+\text{Na}$ ) $^+$  445.2744, found 445.2730.

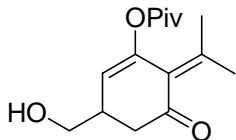

**2,2-Dimethyl-propionic acid 3-hydroxymethyl-6-isopropylidene-5-oxo-cyclohex-1-enyl ester (23).**  $^1\text{H}$  NMR (400 MHz,  $\text{CDCl}_3$ , TMS):  $\delta$  1.27 (s, 9H), 1.99 (s, 3H), 2.14 (s, 3H), 2.48 (dd,  $J = 15.6, 7.2$  Hz, 1H), 2.62 (dd,  $J = 15.6, 6.0$  Hz, 1H), 2.77 (m, 1H), 3.63 (d,  $J = 6.0$  Hz, 1H), 5.52 (d,  $J = 4.4$  Hz, 1H).  $^{13}\text{C}$  NMR (100 MHz,  $\text{CDCl}_3$ ):  $\delta$  24.5, 25.2, 27.3, 35.4, 39.2, 41.9, 65.4, 118.0, 128.1, 147.0, 148.0, 176.8, 200.5. IR (film):  $\nu$  3500, 2977, 2001, 1747, 1688, 1119, 732  $\text{cm}^{-1}$ . HRMS (ESI)  $m/z$  calcd. For  $\text{C}_{15}\text{H}_{22}\text{NaO}_4$  ( $\text{M}+\text{Na}$ ) $^+$  289.1410, found 261.1416.

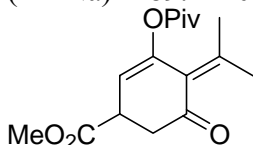

**3-(2,2-Dimethyl-propionyloxy)-4-isopropylidene-5-oxo-cyclohex-2-enecarboxylic acid methyl ester (25).**  $^1\text{H}$  NMR (400 MHz,  $\text{CDCl}_3$ , TMS):  $\delta$  1.27 (s, 9H), 1.99 (s, 3H), 2.18 (s, 3H), 2.73 (m, 2H), 3.50 (m, 1H), 3.72 (s, 3H), 5.76 (d,  $J = 5.2$  Hz, 1H).  $^{13}\text{C}$  NMR (100 MHz,  $\text{CDCl}_3$ ):  $\delta$  24.3, 25.5, 27.3, 37.6, 39.2, 40.6, 52.6, 114.5, 127.7, 148.5, 149.4, 172.4, 176.2, 198.5. IR (film):  $\nu$  2976, 1740, 1693, 1107  $\text{cm}^{-1}$ . HRMS (ESI)  $m/z$  calcd. For  $\text{C}_{16}\text{H}_{22}\text{NaO}_5$  ( $\text{M}+\text{Na}$ ) $^+$  317.1359, found 261.1369.

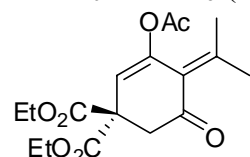

**Diethyl 3-acetoxy-5-oxo-4-(propan-2-ylidene)cyclohex-2-ene-1,1-dicarboxylate (27).**  $^1\text{H}$  NMR (400 MHz,  $\text{CDCl}_3$ , TMS):  $\delta$  1.25 (t,  $J = 7.1$  Hz, 6H), 1.99 (s, 3H), 2.18 (s, 3H), 2.23 (s, 3H), 2.90 (s, 2H), 4.21 (m, 4H), 6.09 (s, 1H).  $^{13}\text{C}$  NMR (100 MHz,  $\text{CDCl}_3$ ):  $\delta$  14.1, 20.9, 24.9, 25.3, 44.1, 53.2, 62.5, 114.9, 126.1, 148.9, 151.2, 168.0, 168.8, 195.8. IR:  $\nu$  2985, 2361, 2344, 1733, 1697, 1266, 1187  $\text{cm}^{-1}$ . HRMS (ESI) for  $\text{C}_{17}\text{H}_{22}\text{O}_7$  ( $\text{M}+1$ ) 339.1438 (Calc.), found 339.1437.

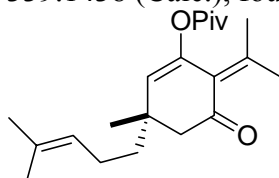

**2,2-Dimethyl-propionic acid 6-isopropylidene-3-methyl-3-(4-methyl-pent-3-enyl)-5-oxo-cyclohex-1-enyl ester (29).**  $^1\text{H}$  NMR (500 MHz,  $\text{CDCl}_3$ , TMS):  $\delta$  1.10 (s, 3H), 1.27 (s, 9H), 1.40 (m, 2H), 1.58 (s, 3H), 1.66 (s, 3H), 1.97 (m, 2H), 1.99 (s, 3H), 2.15 (s, 3H), 2.36 (d,  $J = 15.0$  Hz, 1H), 2.51 (d,  $J = 15.0$  Hz, 1H), 5.06 (t,  $J = 7.0$  Hz, 1H), 5.36 (s, 1H).  $^{13}\text{C}$  NMR (125 MHz,  $\text{CDCl}_3$ ):  $\delta$  17.8, 23.3, 24.8, 25.3, 25.9, 26.8, 27.4, 35.3, 39.2, 42.1,

52.3, 124.3, 126.4, 127.6, 131.9, 146.0, 146.4, 176.7, 201.0. IR (film):  $\nu$  2967, 1751, 1693, 1273, 1111  $\text{cm}^{-1}$ . HRMS (ESI)  $m/z$  calcd. For  $\text{C}_{21}\text{H}_{32}\text{NaO}_3$  ( $\text{M}+\text{Na}$ )<sup>+</sup> 355.2243, found 355.2251.  $[\alpha]_{\text{D}}^{25} = -10.7$  ( $c$  0.3,  $\text{CHCl}_3$ ); The enantiomeric excess (87%) of product **29** was determined by HPLC analysis of an alcohol derived from reduction of ketone group in **29**. (Chiralcel AS-H; eluent: pure hexane; flow rate: 0.7 mL/min; detection: at 210 nm): retention times  $t_1 = 6.8$  min  $t_2 = 7.2$  min.

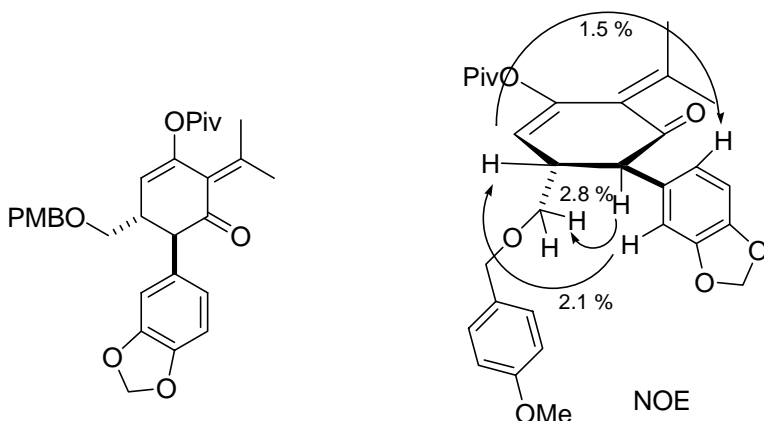

**2,2-Dimethyl-propionic acid 4-benzo[1,3]dioxol-5-yl-6-isopropylidene-3-(4-methoxybenzyloxymethyl)-5-oxo-cyclohex-1-enyl ester (31).**  $^1\text{H}$  NMR (500 MHz,  $\text{CDCl}_3$ , TMS):  $\delta$  1.28 (s, 9H), 1.98 (s, 3H), 2.02 (s, 3H), 2.93 (m, 1H), 3.28 (dd,  $J = 9.5, 7.0$  Hz, 1H), 3.36 (dd,  $J = 9.0, 4.5$  Hz, 1H), 3.58 (d,  $J = 8.5$  Hz, 1H), 3.80 (s, 3H), 4.33 (d,  $J = 9.6$  Hz, 1H), 4.40 (d,  $J = 9.2$  Hz, 1H), 5.63 (d,  $J = 3.0$  Hz, 1H), 5.93 (s, 2H), 6.58 (dd,  $J = 8.0, 1.5$  Hz, 1H), 6.65 (d,  $J = 1.5$  Hz, 1H), 6.74 (d,  $J = 9.0$  Hz, 1H), 6.85 (m, 2H), 7.19 (m, 2H).  $^{13}\text{C}$  NMR (125 MHz,  $\text{CDCl}_3$ ):  $\delta$  24.3, 24.9, 27.4, 39.3, 40.3, 55.5, 56.3, 70.9, 73.0, 101.2, 108.5, 109.3, 114.0, 118.6, 122.7, 128.4, 129.5, 130.3, 132.2, 146.5, 146.7, 146.9, 148.0, 159.5, 176.5, 200.5. IR (film):  $\nu$  1749, 1513, 1248, 1125, 1037  $\text{cm}^{-1}$ . HRMS (ESI)  $m/z$  calcd. For  $\text{C}_{30}\text{H}_{34}\text{NaO}_7$  ( $\text{M}+\text{Na}$ )<sup>+</sup> 529.2196, found 529.2198.

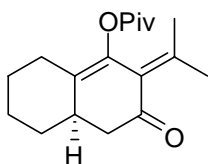

**(R)-3-oxo-2-(propan-2-ylidene)-2,3,4,4a,5,6,7,8-octahydronaphthalen-1-yl pivalate (33).**  $^1\text{H}$  NMR (400 MHz,  $\text{CDCl}_3$ , TMS):  $\delta$  1.24 (s, 9H), 1.26 (m, 1H), 1.34 (m, 2H), 1.70 (m, 3H), 1.80 (m, 1H), 1.87 (s, 6H), 2.26 (dd,  $J = 13.4, 7.6$  Hz, 1H), 2.44 (m, 2H), 2.61 (m, 1H).  $^{13}\text{C}$  NMR (100 MHz,  $\text{CDCl}_3$ ):  $\delta$  23.6, 24.0, 25.8, 26.9, 27.7, 35.3, 36.9, 39.3, 47.1, 53.7, 123.8, 129.8, 130.2, 137.8, 175.7, 200.7. IR:  $\nu$  2975, 2933, 2860, 2361, 1745, 1704, 1271, 1111  $\text{cm}^{-1}$ . HRMS (ESI) for  $\text{C}_{18}\text{H}_{26}\text{O}_3$  ( $\text{M}+1$ ) 291.1955 (Calc.), found 291.1967.

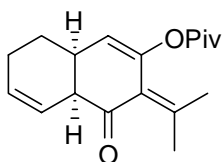

**(4a*S*,8a*S*)-4-oxo-3-(propan-2-ylidene)-3,4,4a,7,8,8a-hexahydronaphthalen-2-yl pivalate (35).** <sup>1</sup>H NMR (400 MHz, CDCl<sub>3</sub>, TMS): δ 1.24 (s, 9H), 1.43 (m, 1H), 1.74 (m, 1H), 1.94 (s, 3H), 2.02 (s, 3H), 2.03 (m, 2H), 2.70 (m, 1H), 3.15 (m, 1H), 5.46 (d, *J* = 5.6 Hz, 1H), 5.74 (m, 1H), 5.87 (m, 1H). <sup>13</sup>C NMR (100 MHz, CDCl<sub>3</sub>): δ 24.17, 24.22, 24.5, 26.3, 27.4, 32.6, 39.2, 48.4, 120.3, 124.2, 128.1, 129.3, 144.3, 146.0, 176.5, 201.8. IR: ν 2976, 2922, 2874, 2360, 2343, 1750, 1688, 1159, 1113 cm<sup>-1</sup>. HRMS (ESI) for C<sub>18</sub>H<sub>24</sub>O<sub>3</sub> (M+1) 289.1798 (Calc.), found 289.1796.

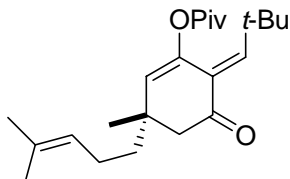

**2,2-Dimethyl-propionic acid 6-(2,2-dimethyl-propylidene)-3-methyl-3-(4-methyl-pent-3-enyl)-5-oxo-cyclohex-1-enyl ester (37).** <sup>1</sup>H NMR (400 MHz, CDCl<sub>3</sub>, TMS): δ 1.11 (s, 3H), 1.19 (s, 9H), 1.30 (s, 9H), δ 1.41 (m, 2H), 1.58 (d, *J* = 0.4 Hz, 3H), 1.66 (d, *J* = 1.2 Hz, 3H), 1.97 (m, 2H), 2.37 (d, *J* = 16.0 Hz, 1H), 2.48 (d, *J* = 16.0 Hz, 1H), 5.05 (tqq, *J* = 7.2, 1.2, 0.4 Hz, 1H), 5.51 (d, *J* = 1.2 Hz, 1H), 6.76 (d, *J* = 1.6 Hz, 1H). <sup>13</sup>C NMR (100 MHz, CDCl<sub>3</sub>): δ 17.8, 23.4, 25.8, 26.3, 27.5, 30.1, 33.0, 34.7, 39.3, 41.8, 49.8, 124.1, 128.5, 128.9, 132.0, 144.9, 148.8, 177.4, 200.5. IR (film): ν 2962, 1752, 1703, 1479, 1107 cm<sup>-1</sup>. HRMS (ESI) *m/z* calcd. For C<sub>23</sub>H<sub>36</sub>NaO<sub>3</sub> (M+Na)<sup>+</sup> 383.2556, found 383.2564.

## Reference

1. F. Kleinbeck, F.D. Toste, *J. Am. Chem. Soc.* **2009**, *131*, 9178.
2. M. Uemura, I.D.G. Watson, F. D. Toste, *J. Am. Chem. Soc.* **2009**, *131*, 3464.
3. J. Peitruszka, A.C.M. Rieche, T. Wilhelm, A. Witt, *Adv. Synth. Catal.* **2003**, *345*, 1273.
4. (a) G.J. Roth, B. Liepold, S.G. Muller, H. J. Bestmann. *Synthesis*. **2004**, 59. (b) J. C. Gilbert, U. Weerasooriya, *J. Org. Chem.*, **1982**, *47*, 1837-1845.
5. A. B. Charette, H. Juteau, H. Lebel, C. Molinaro. *J. Am. Chem. Soc.* **1998**, *120*, 11943.

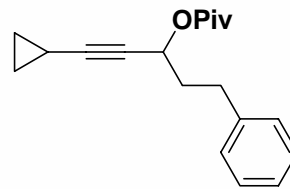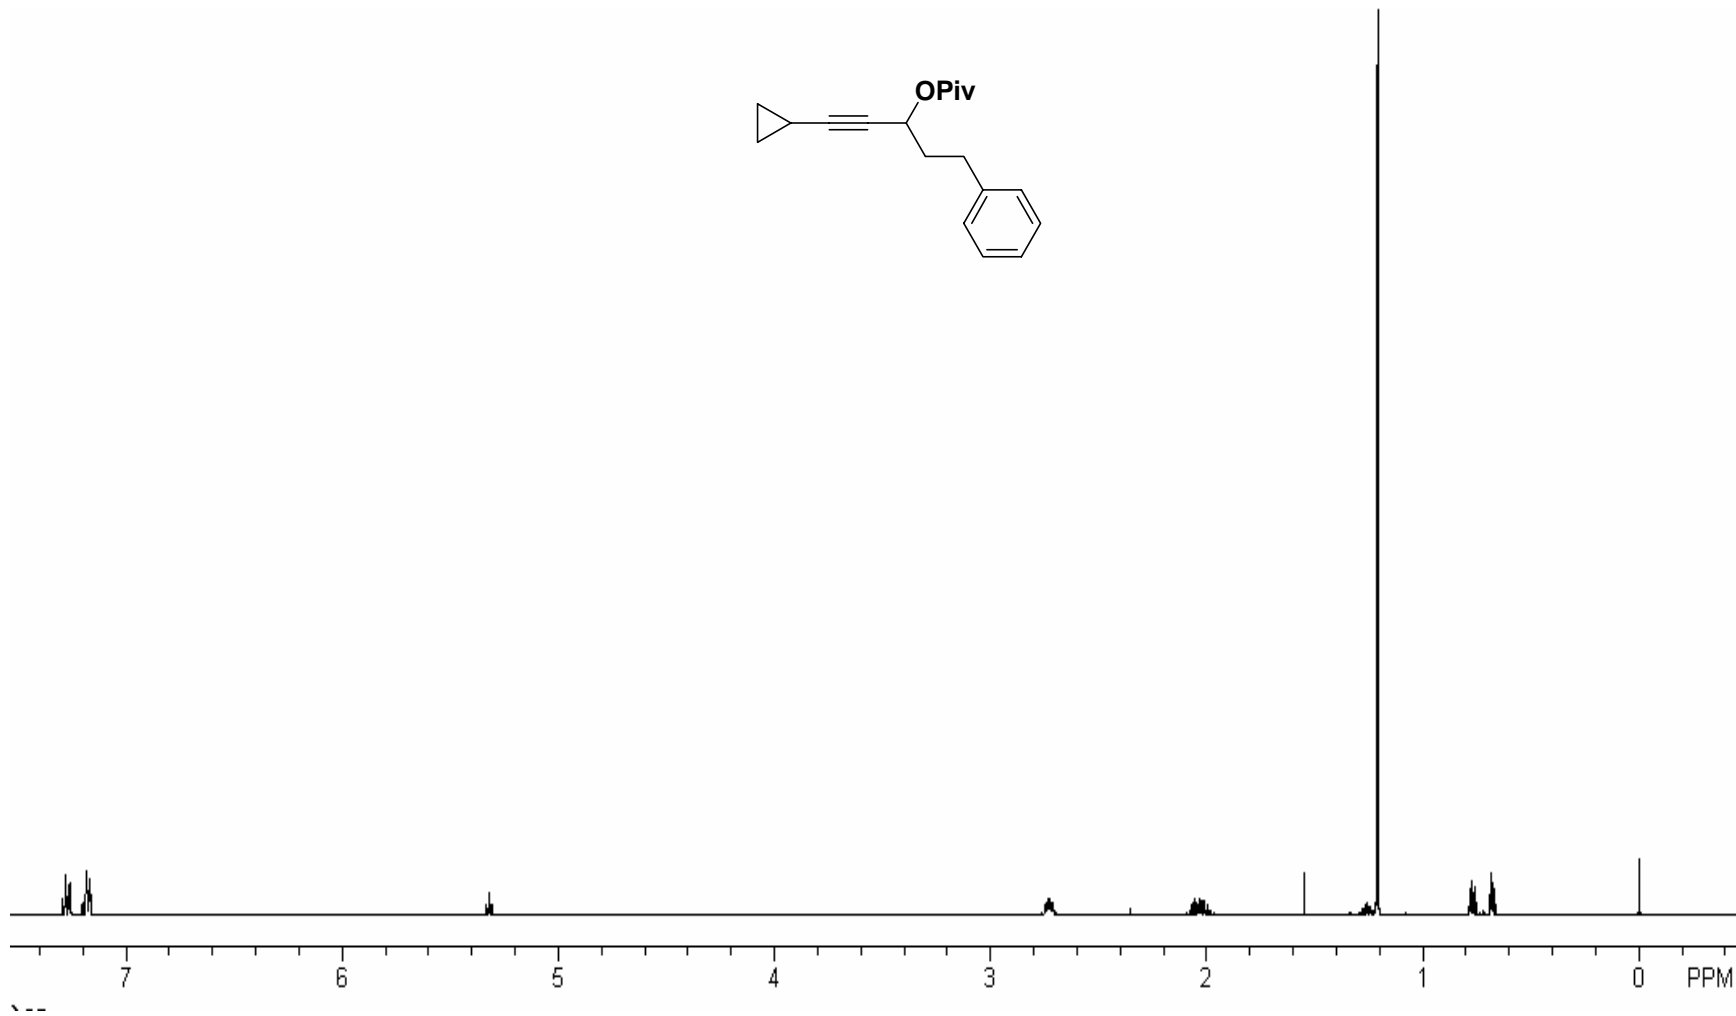

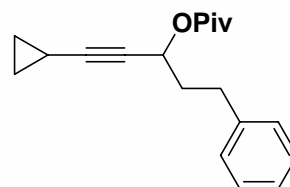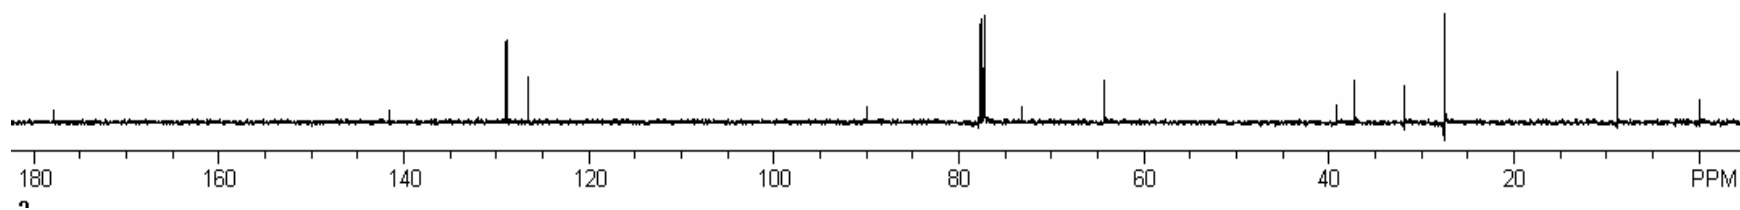

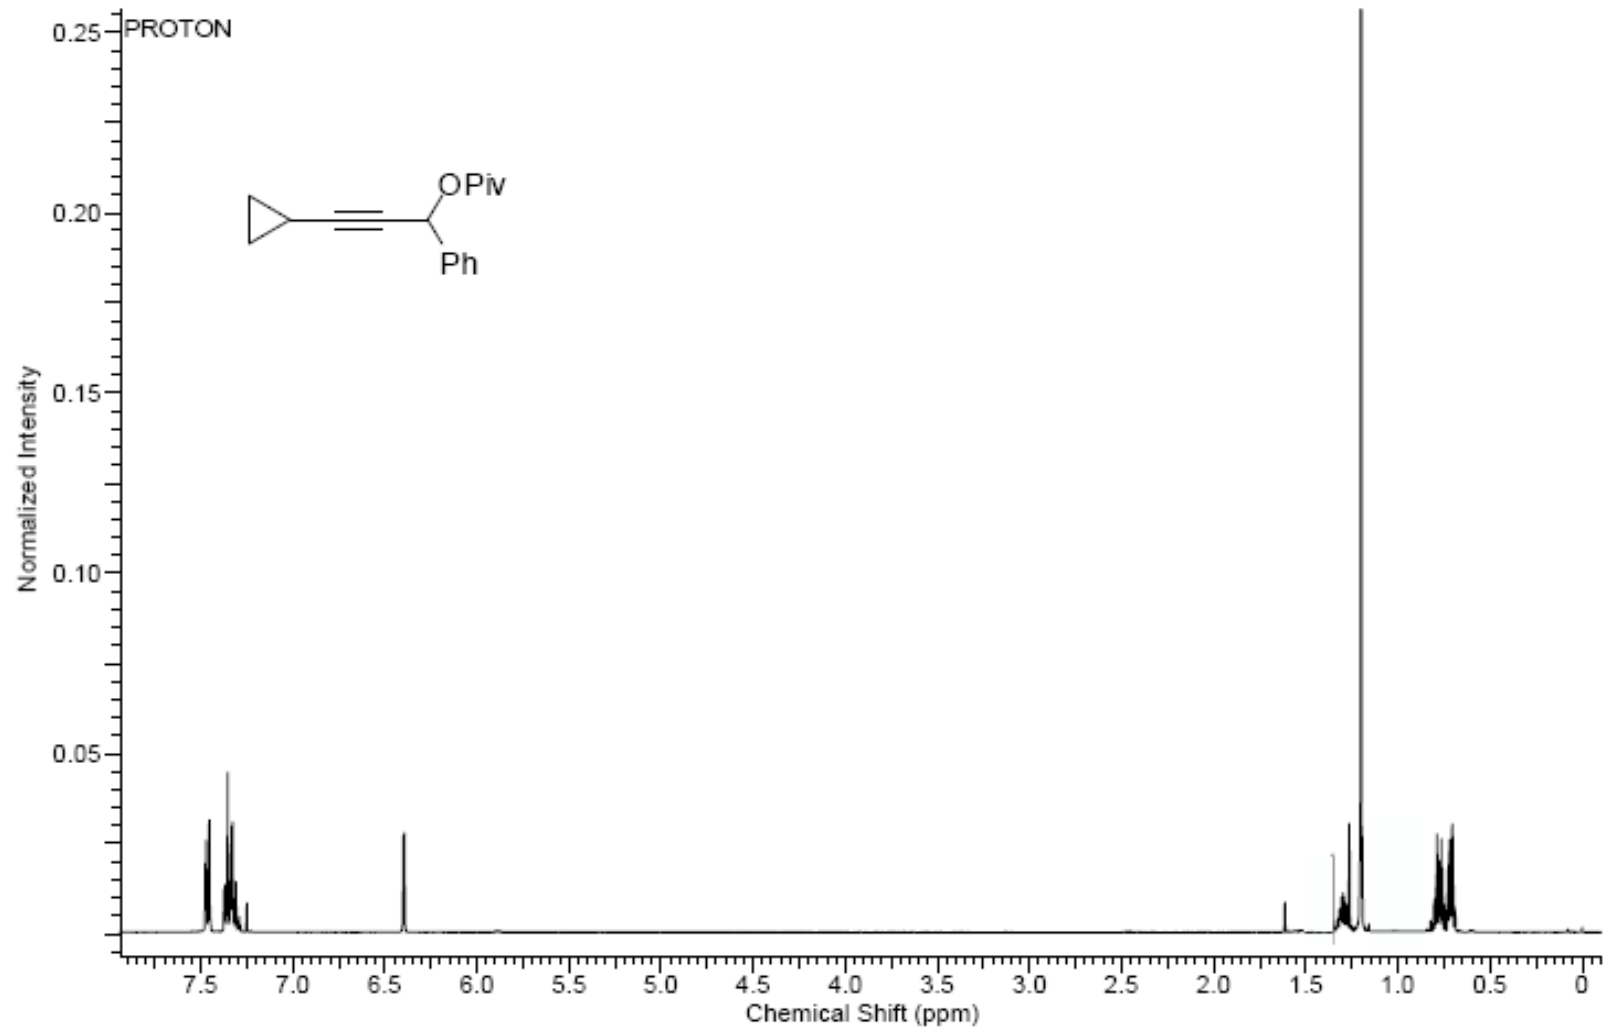

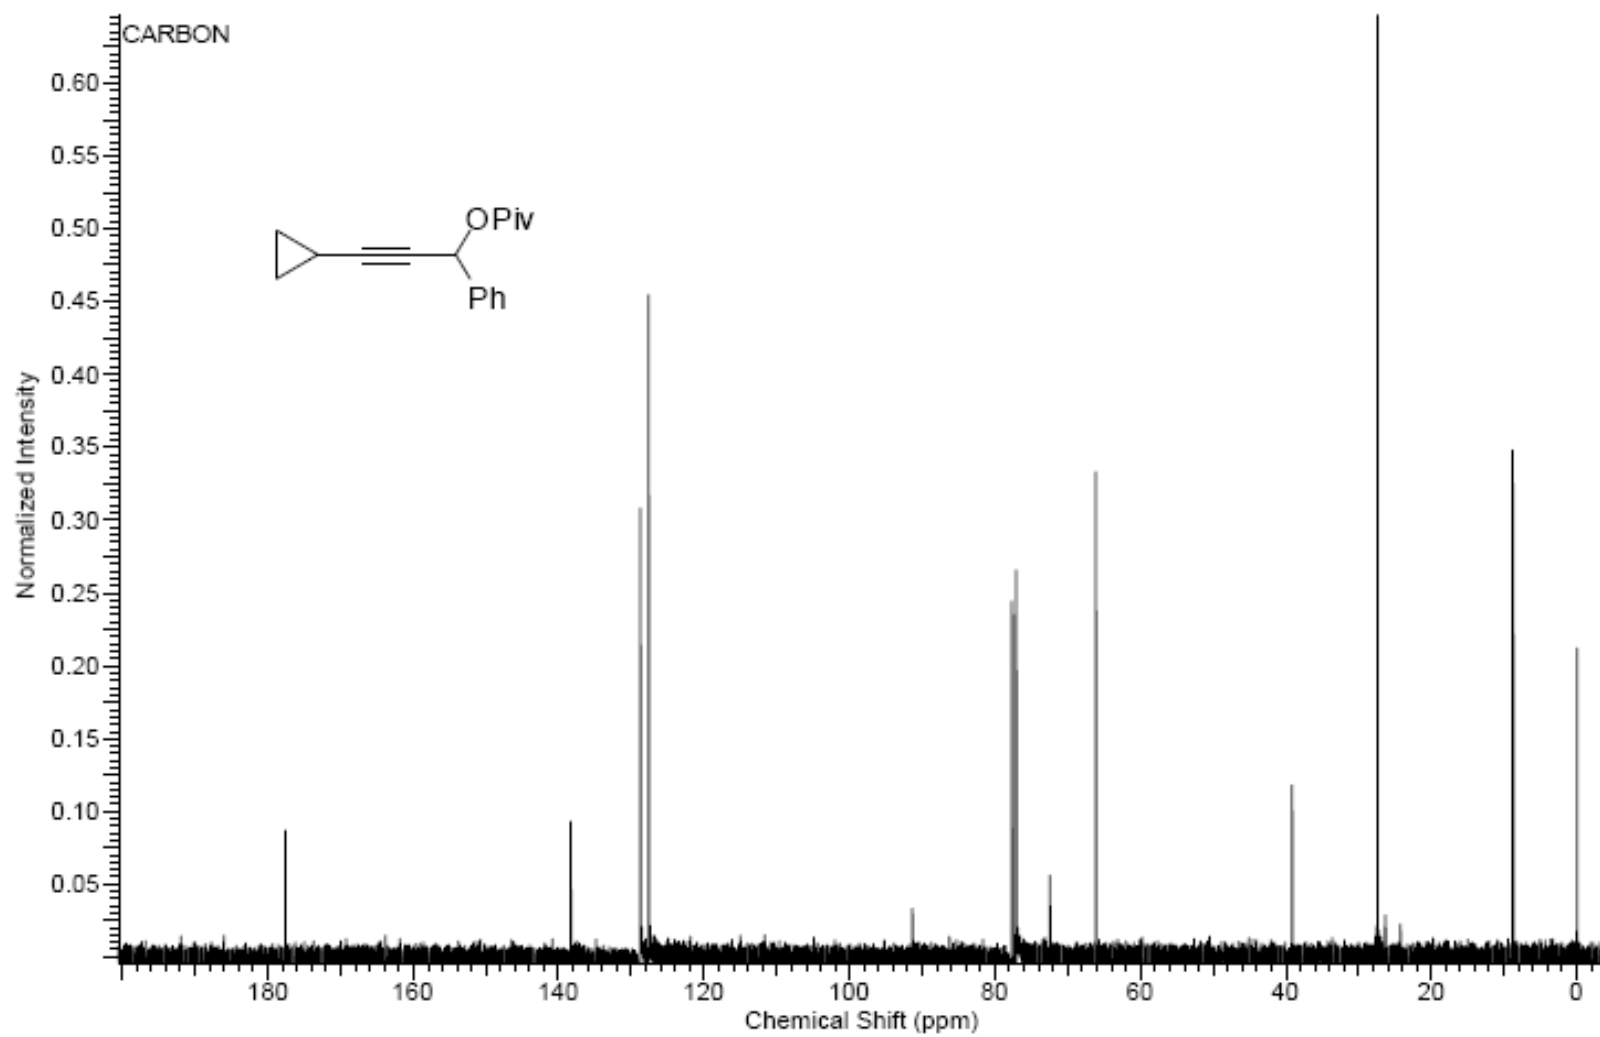



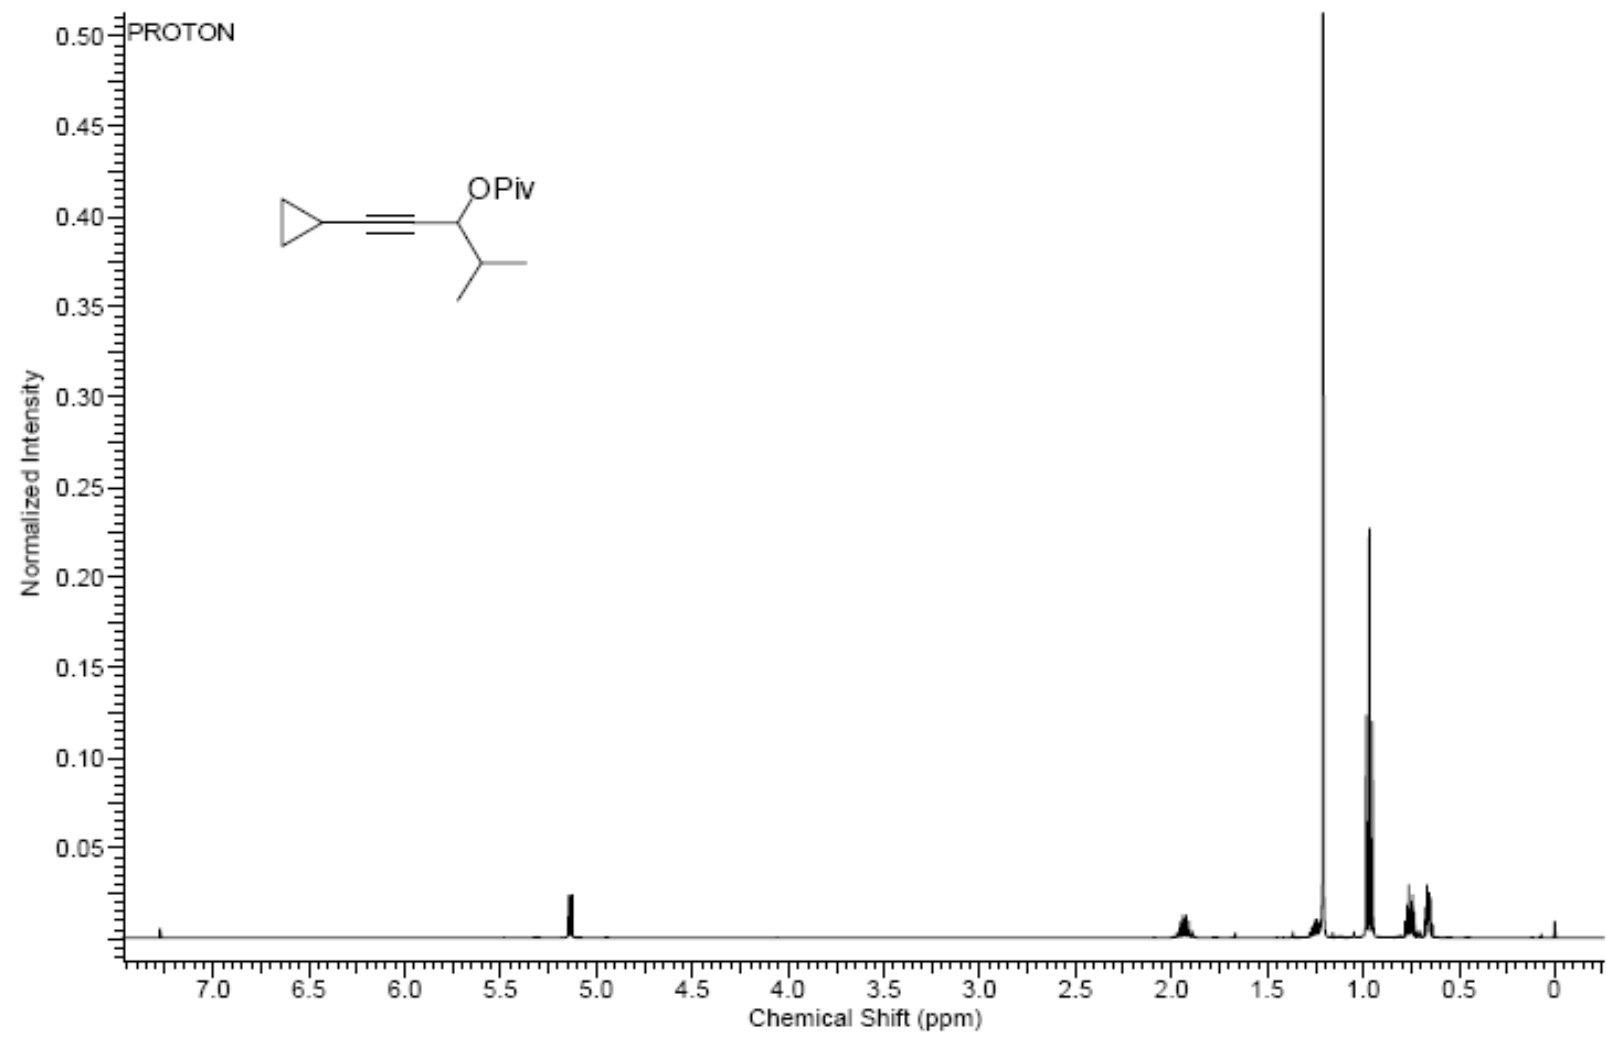

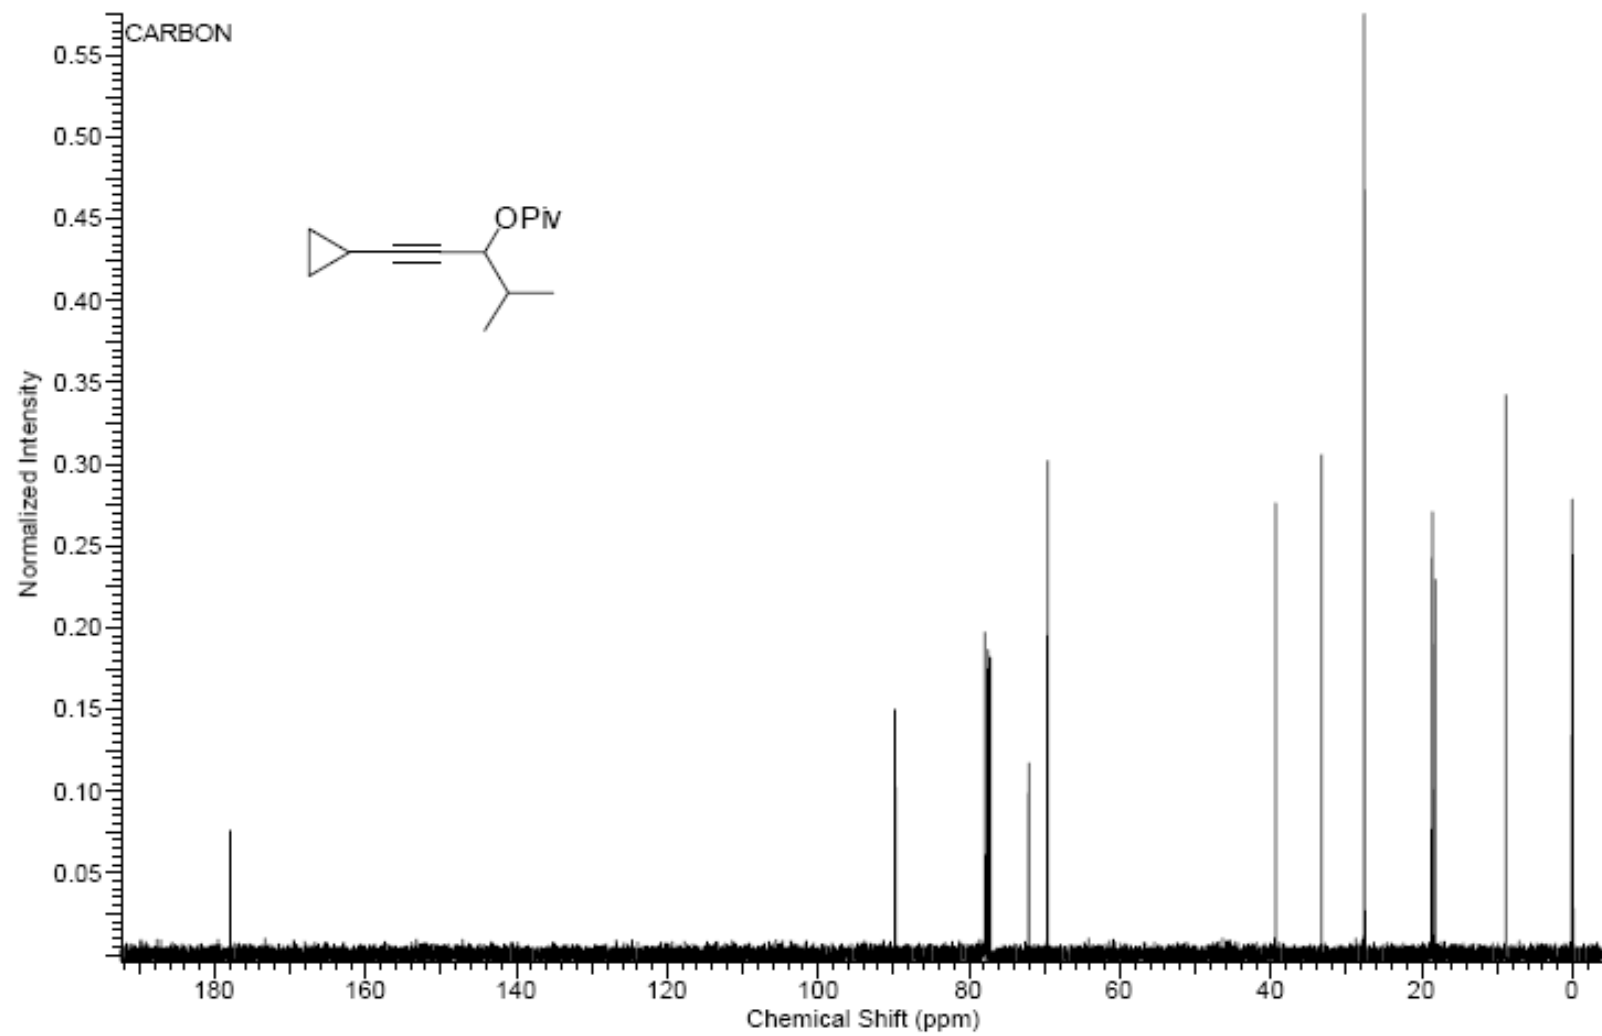

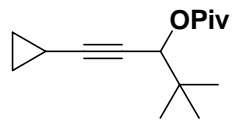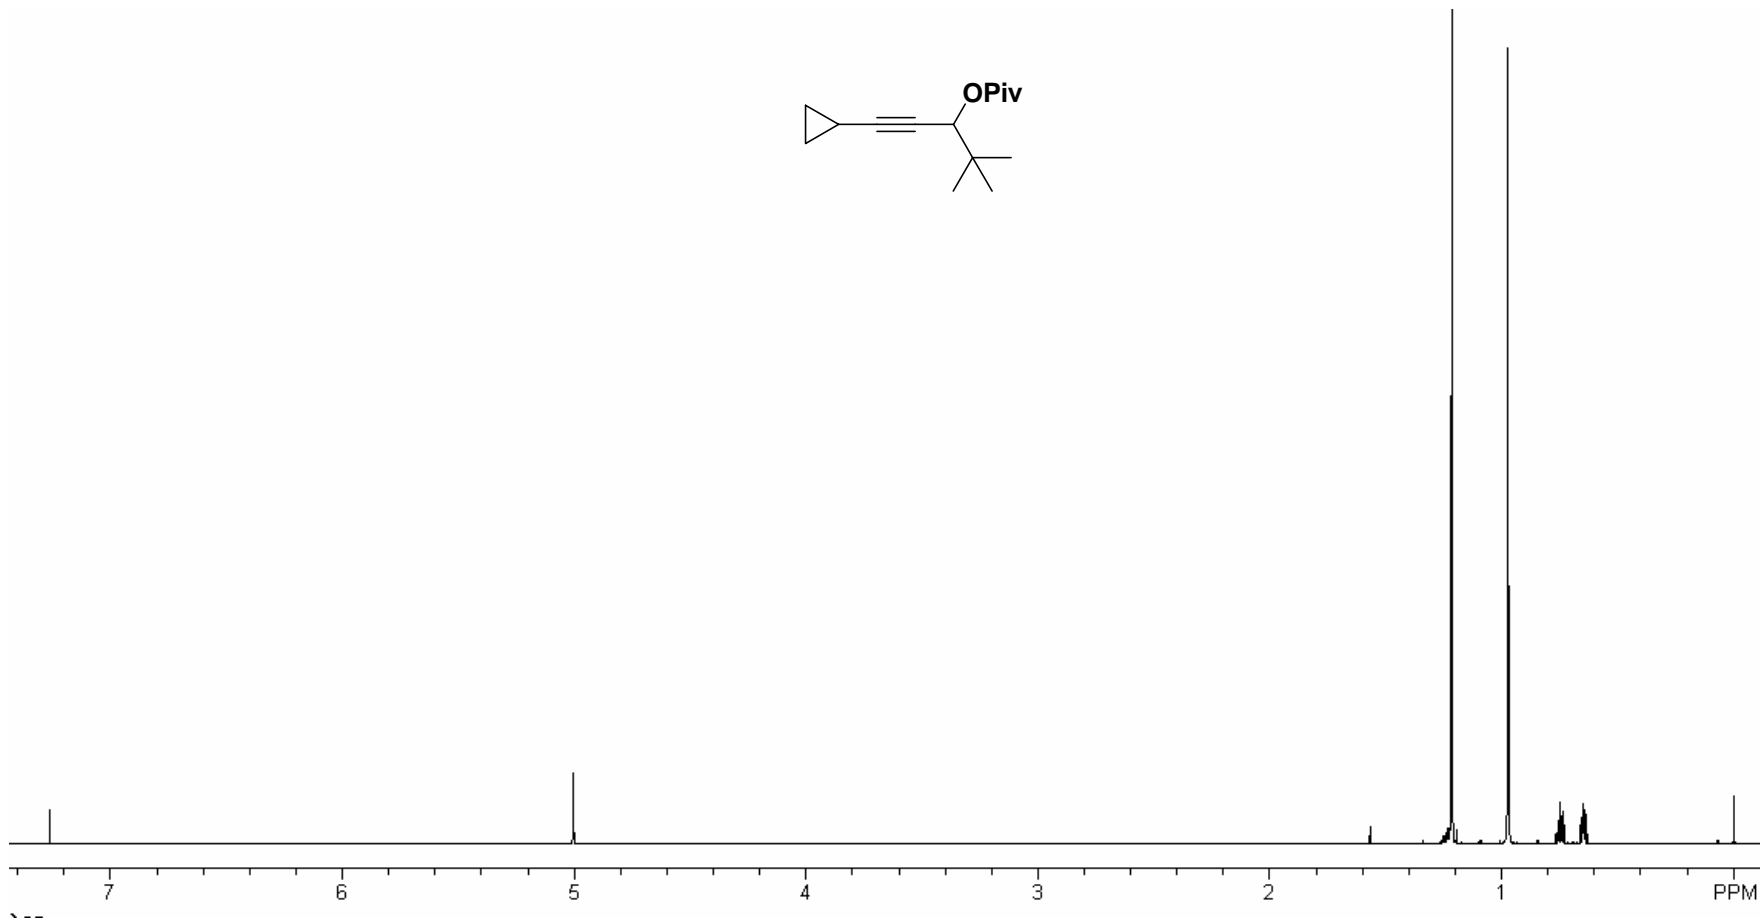

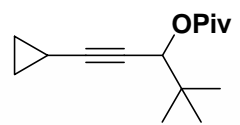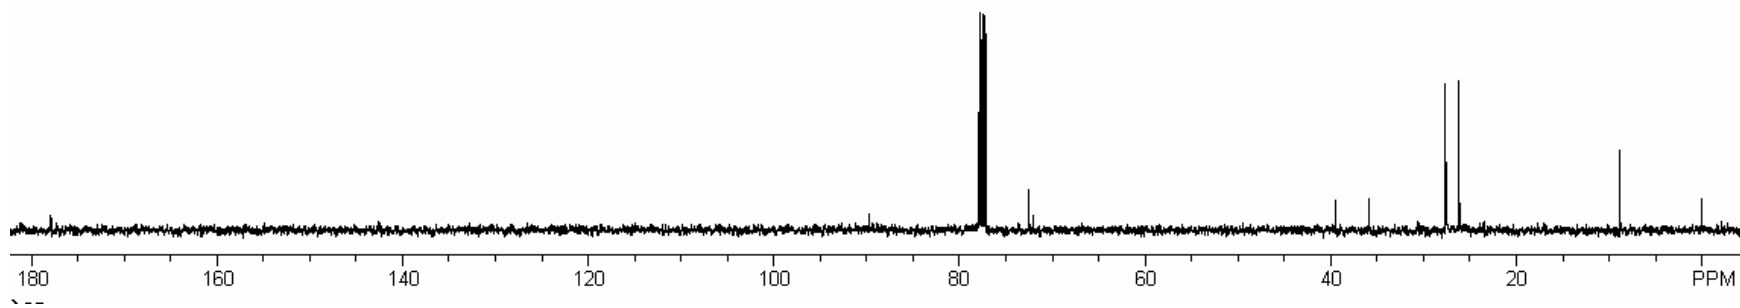

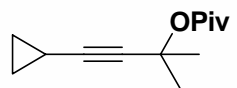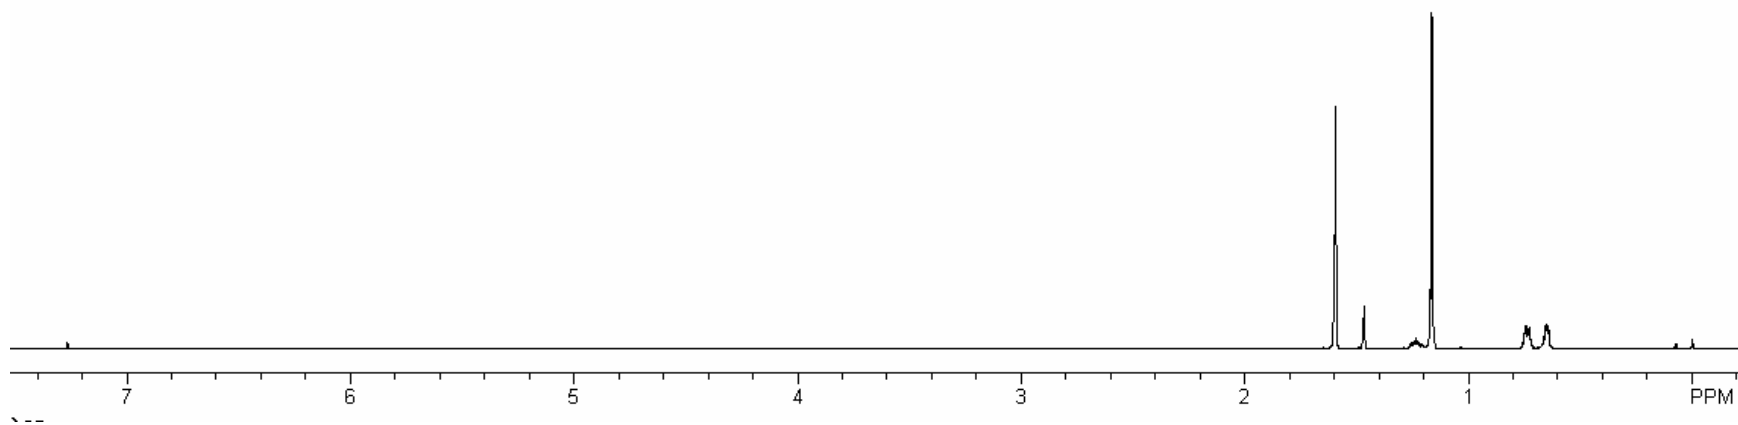

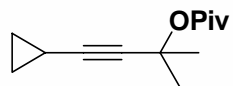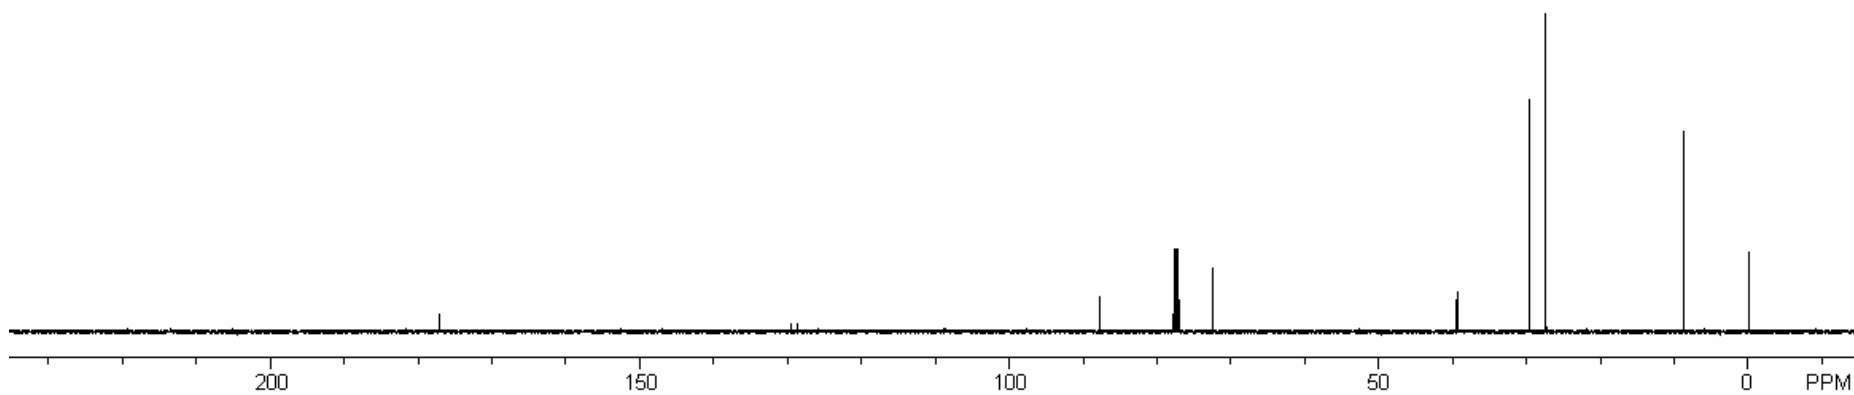

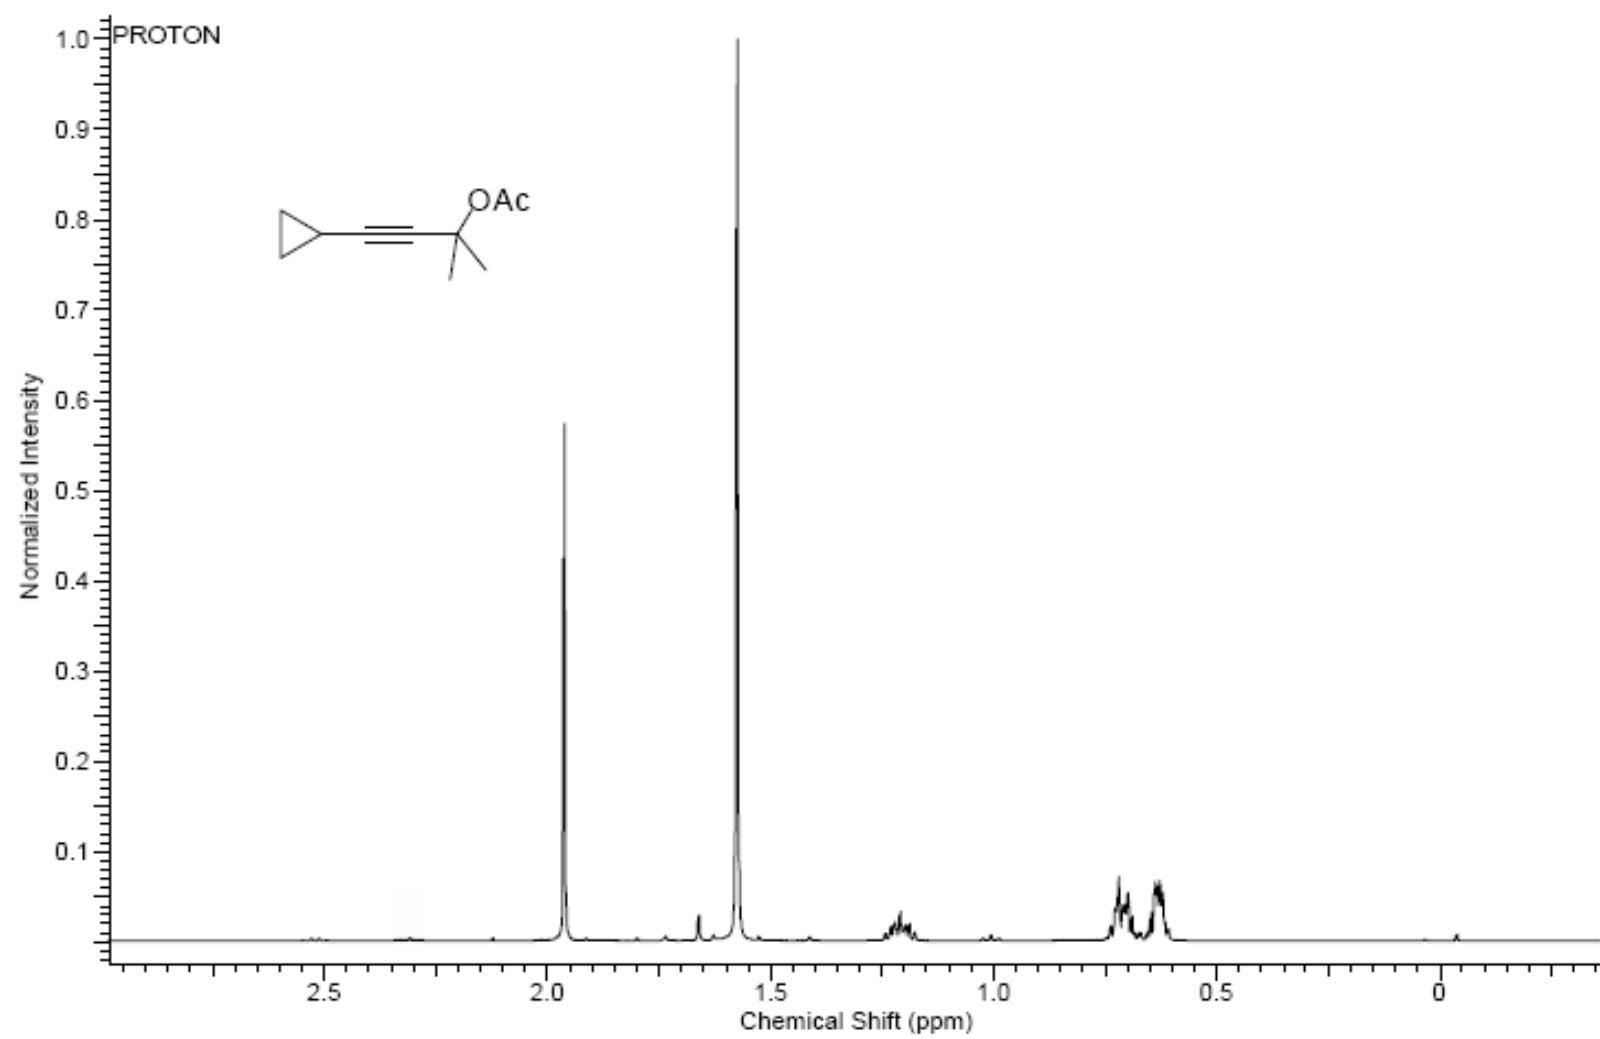

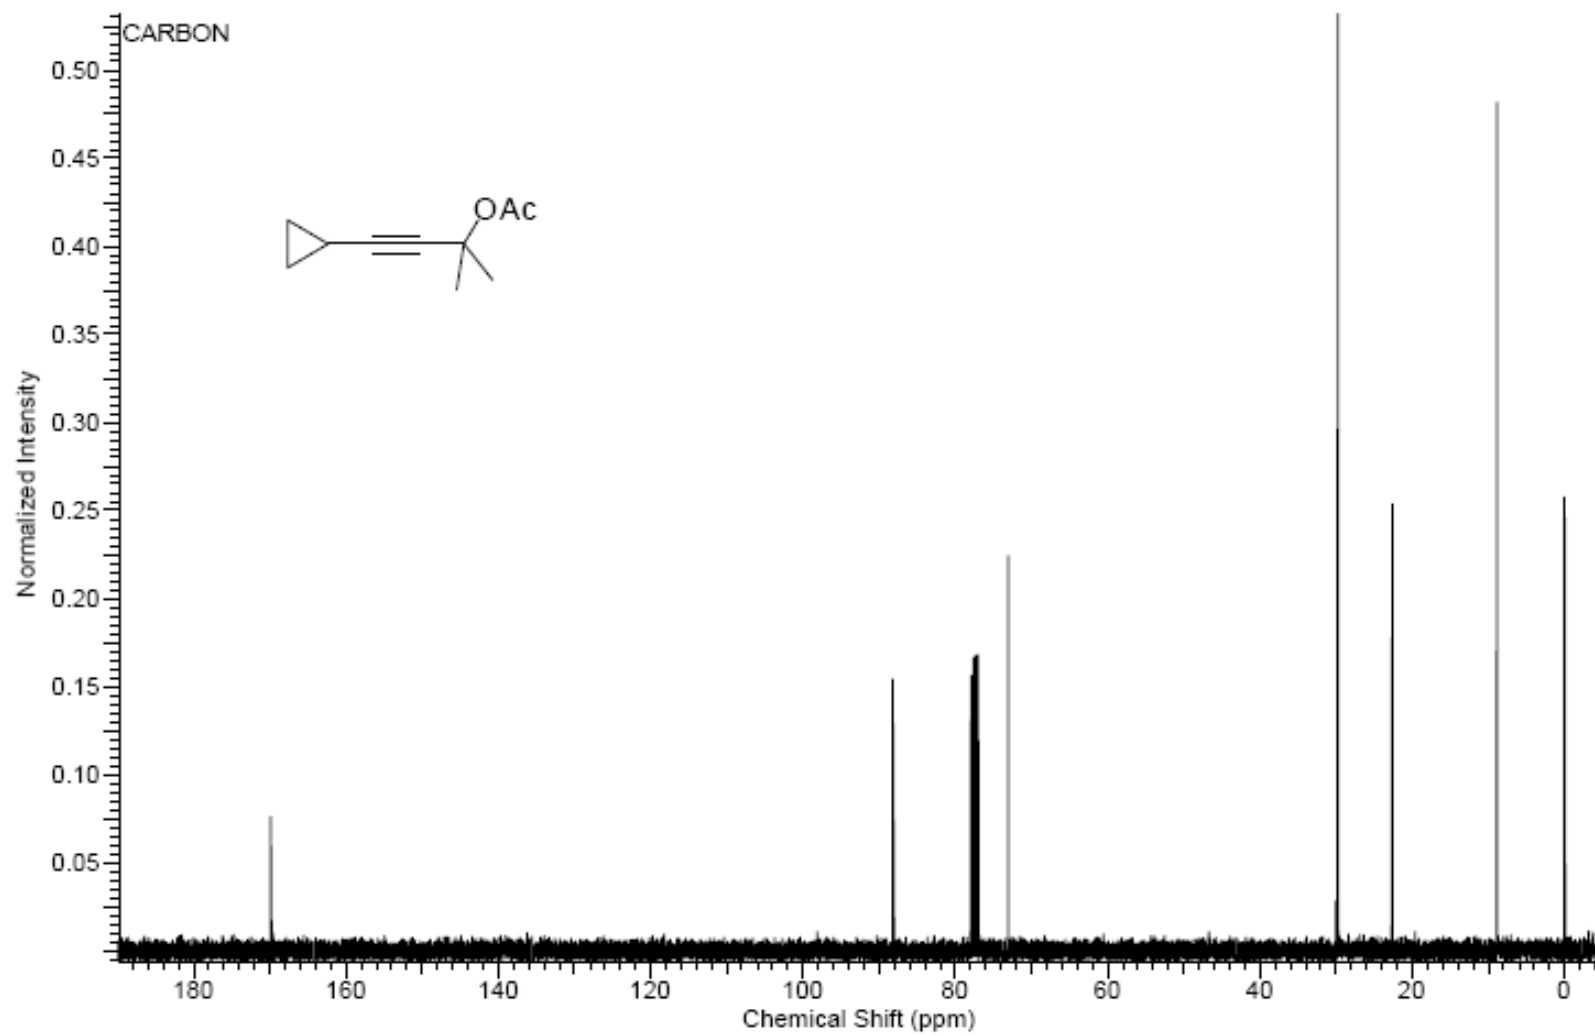



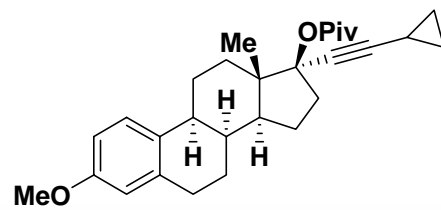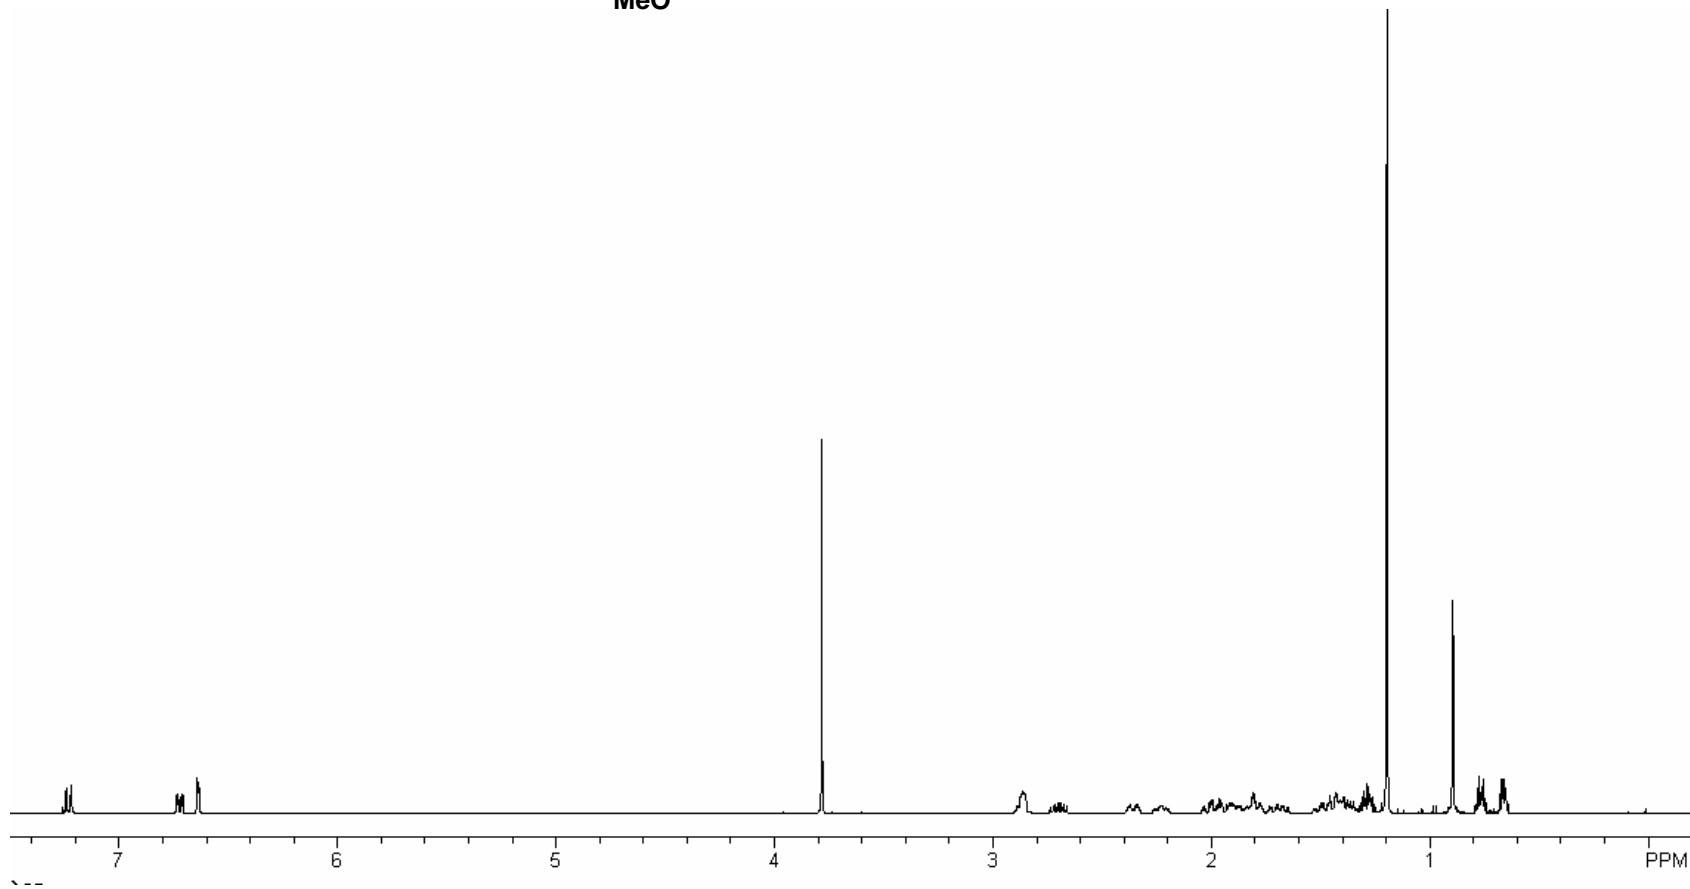

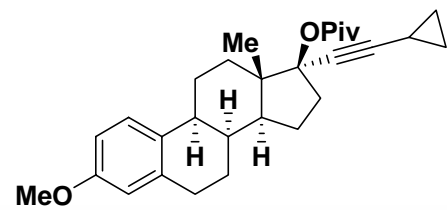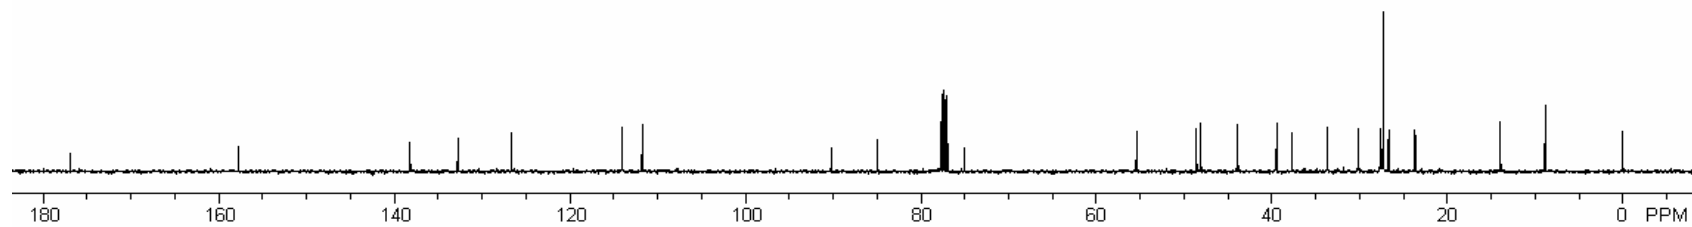

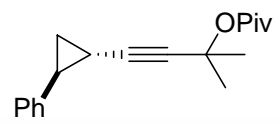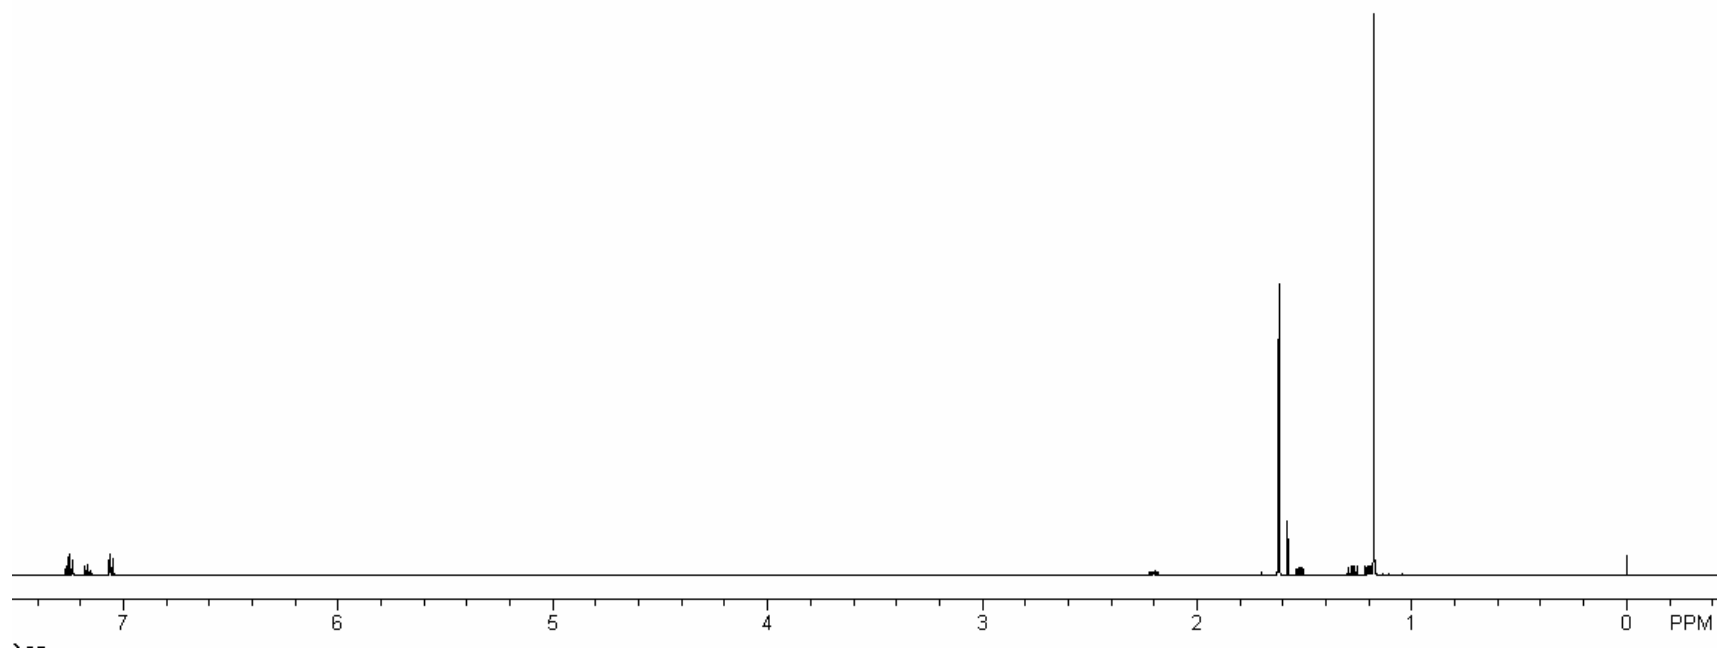

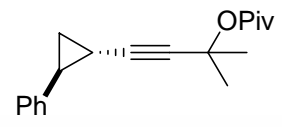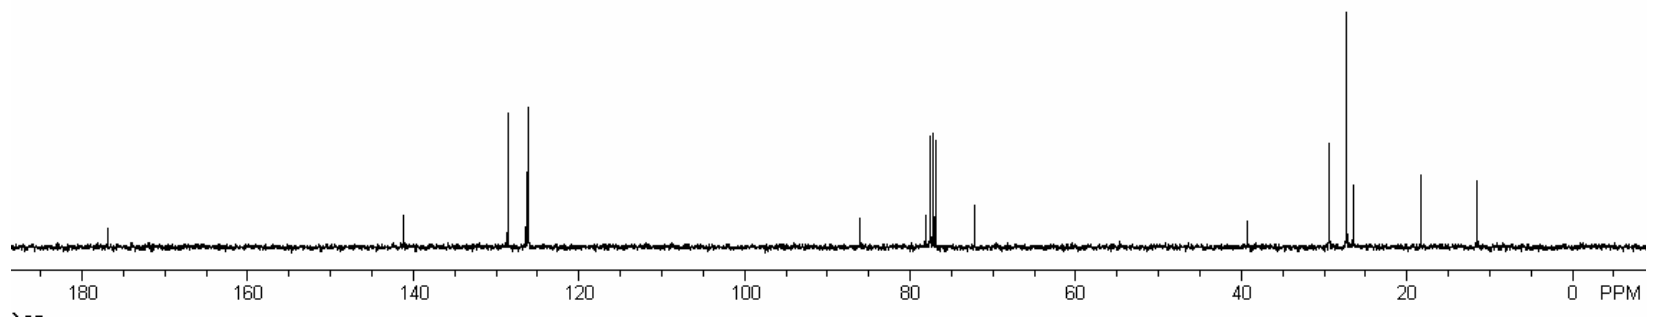

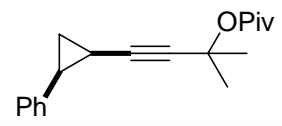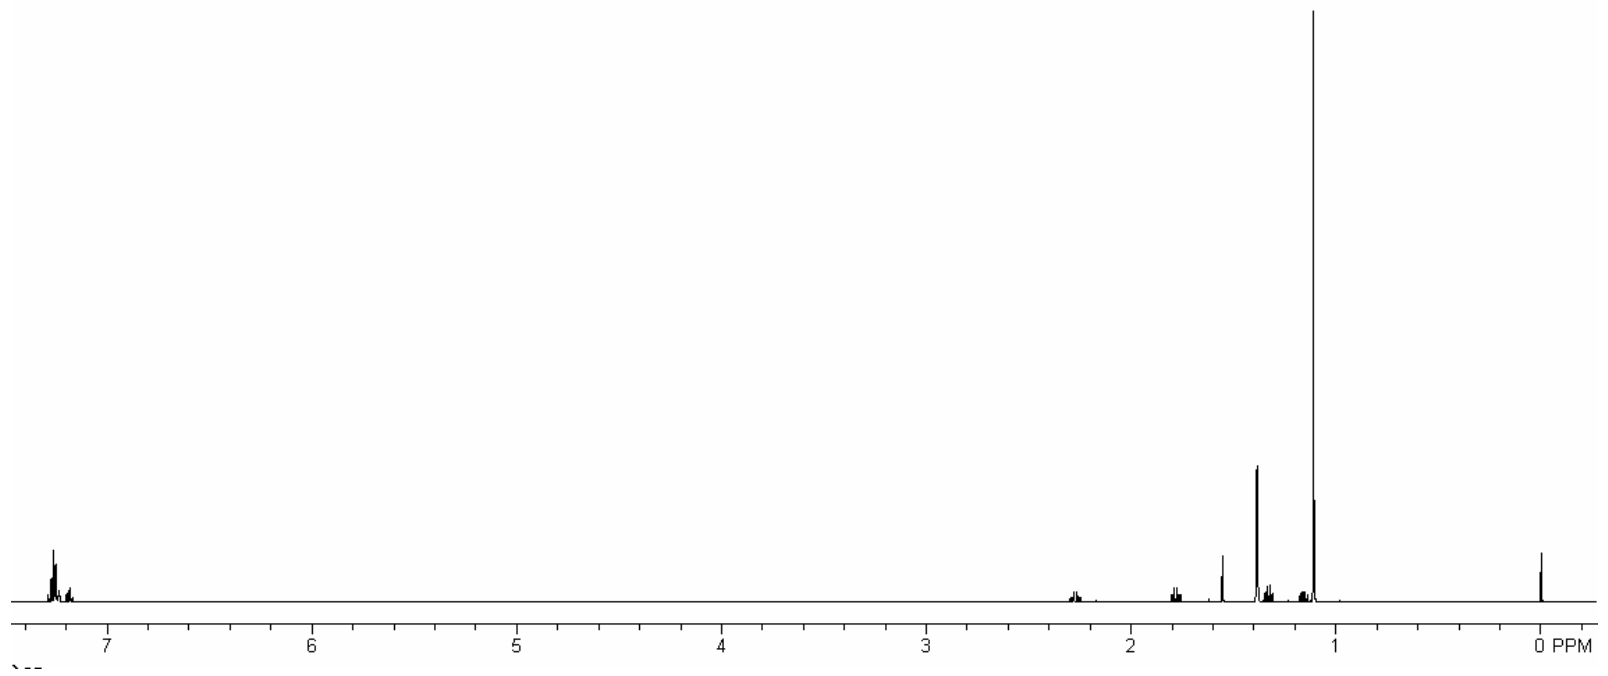

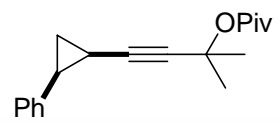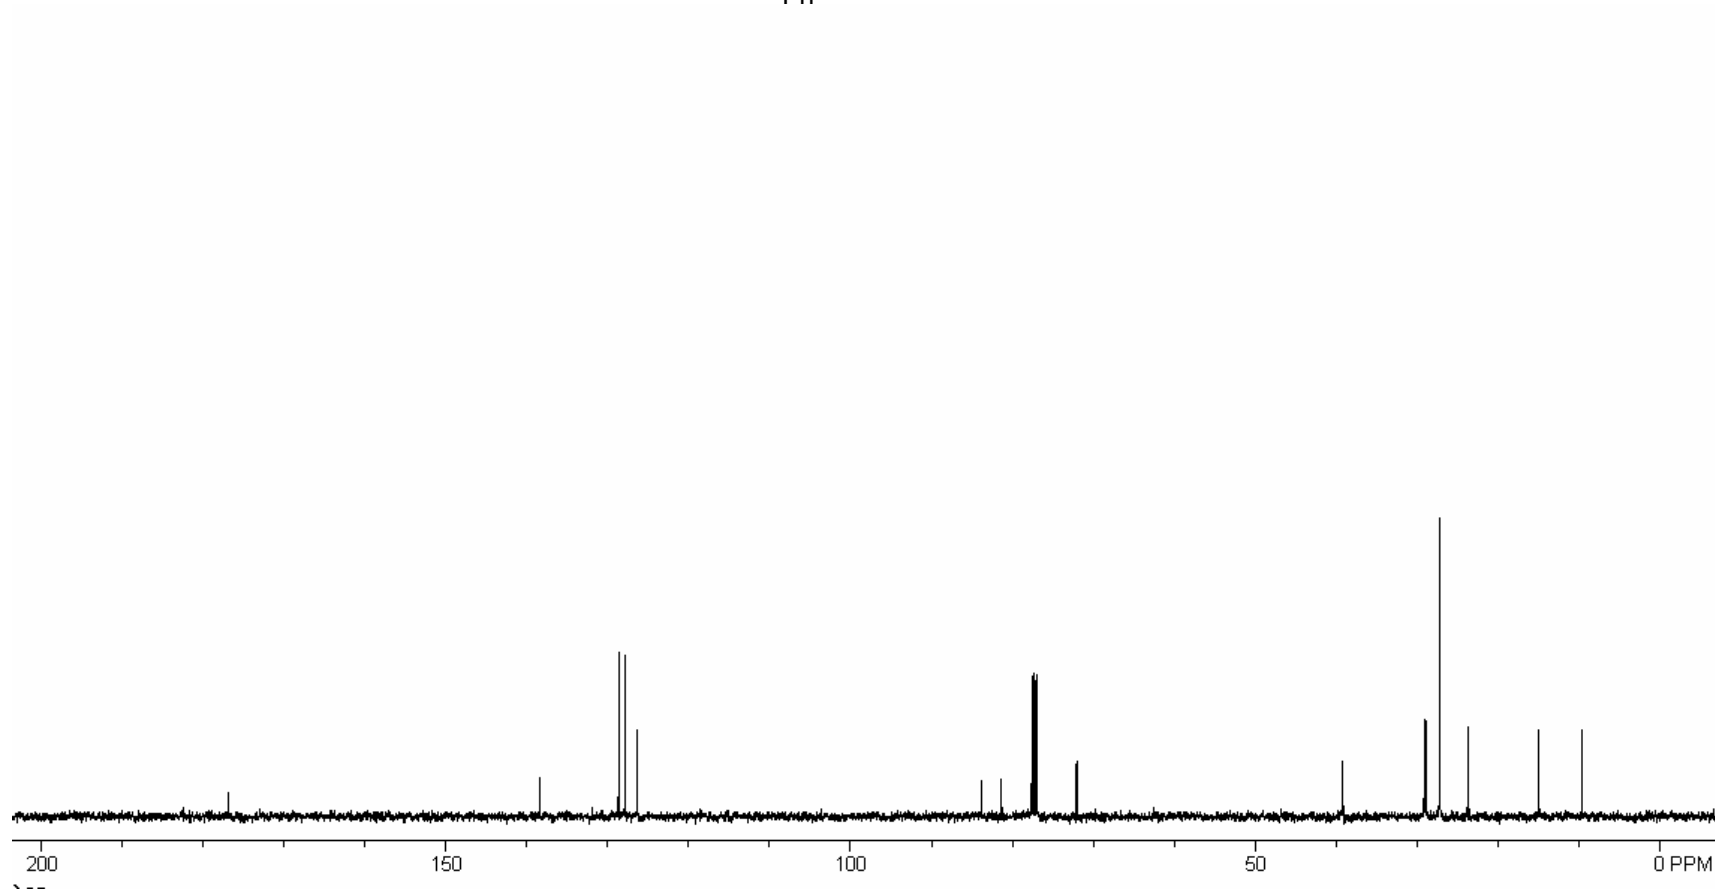



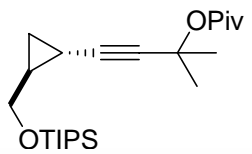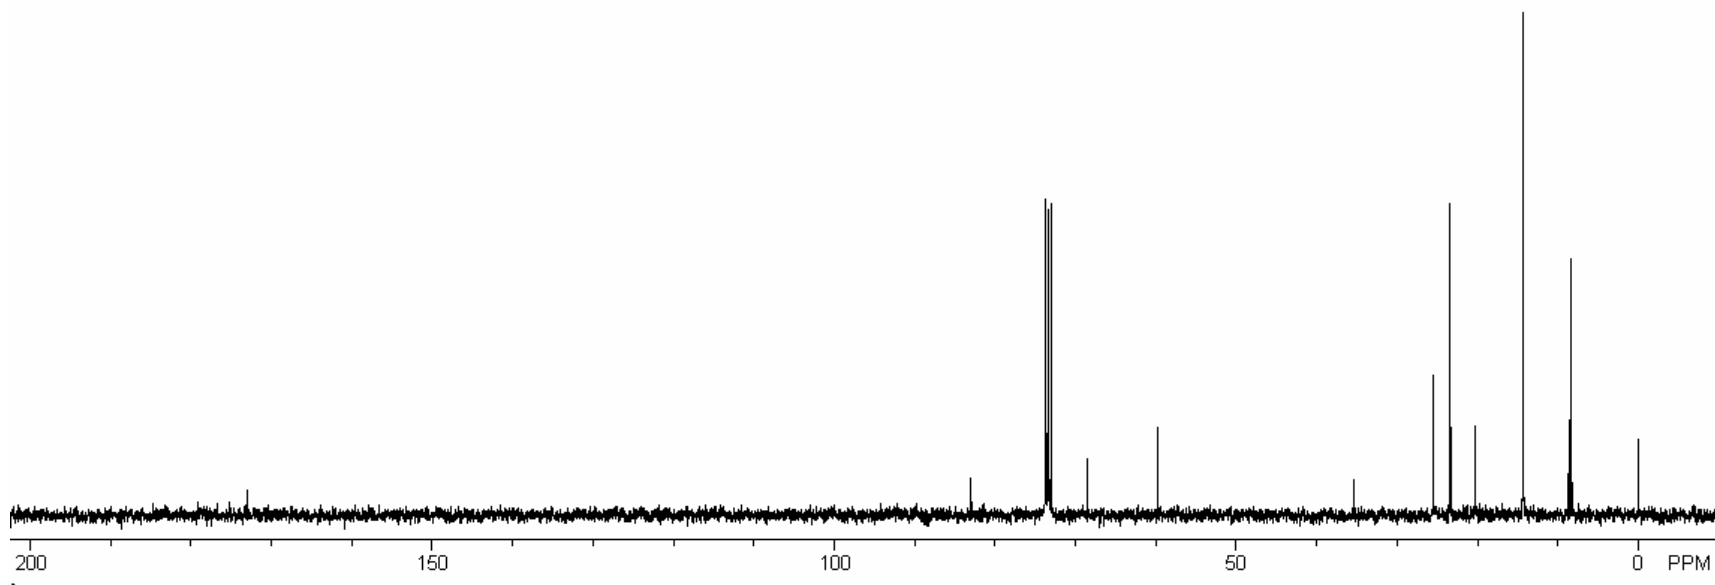



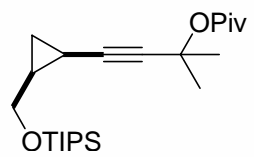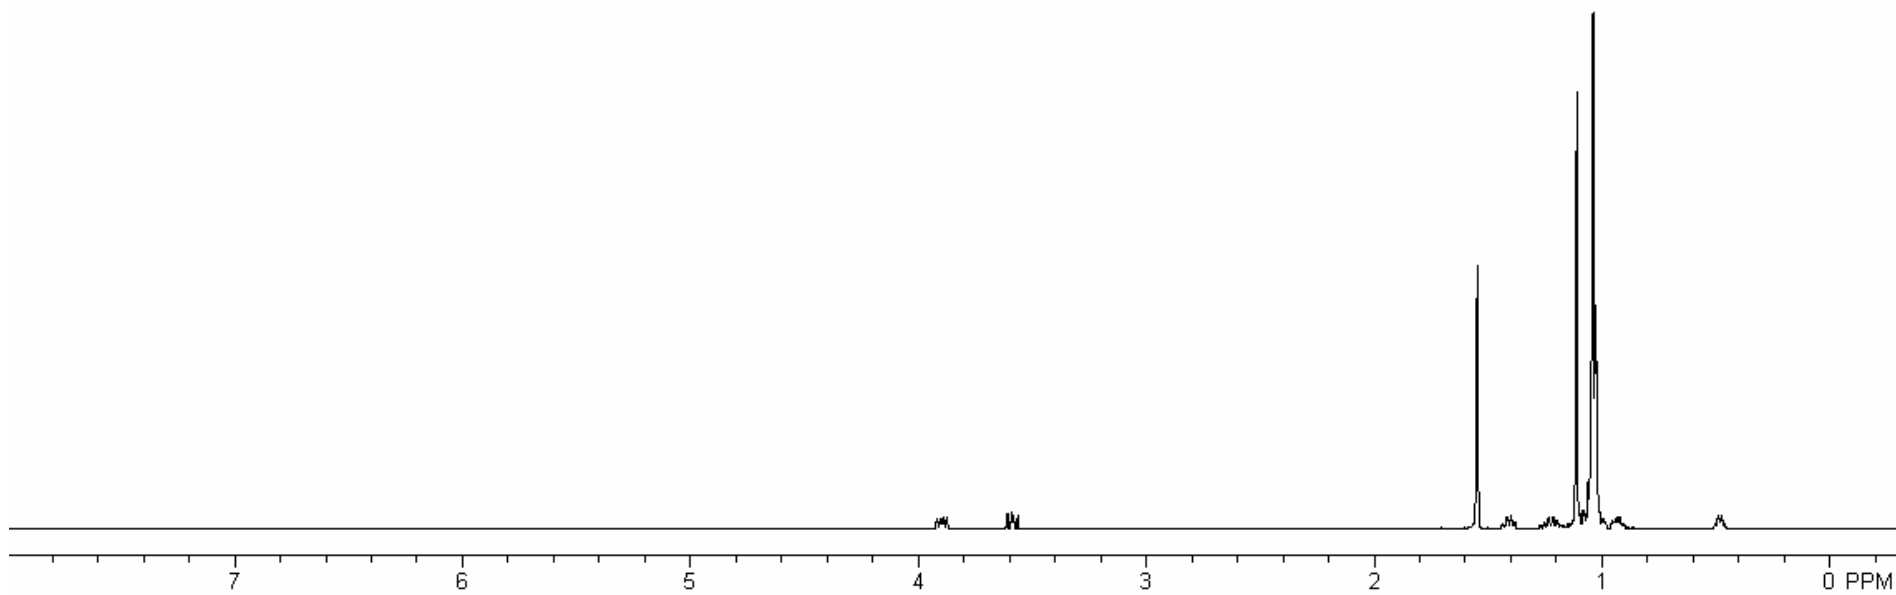



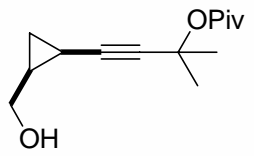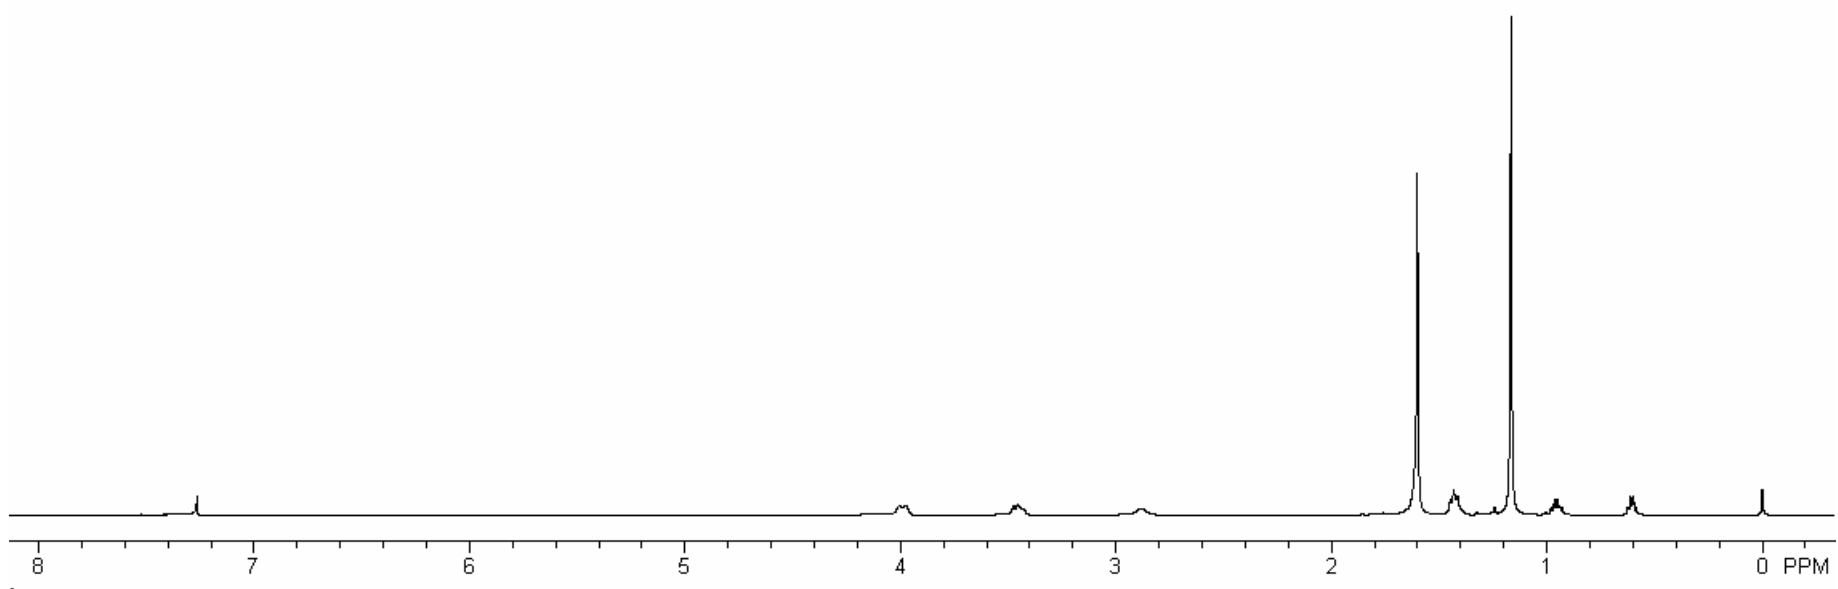

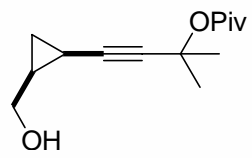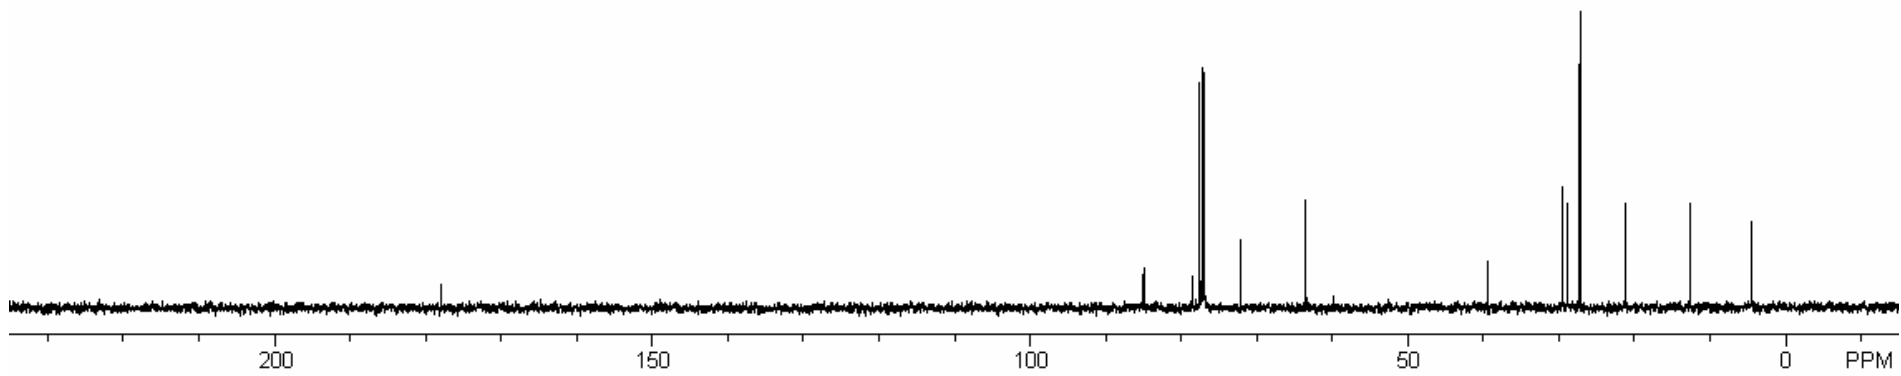

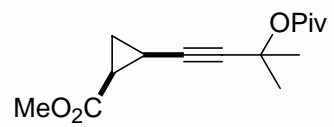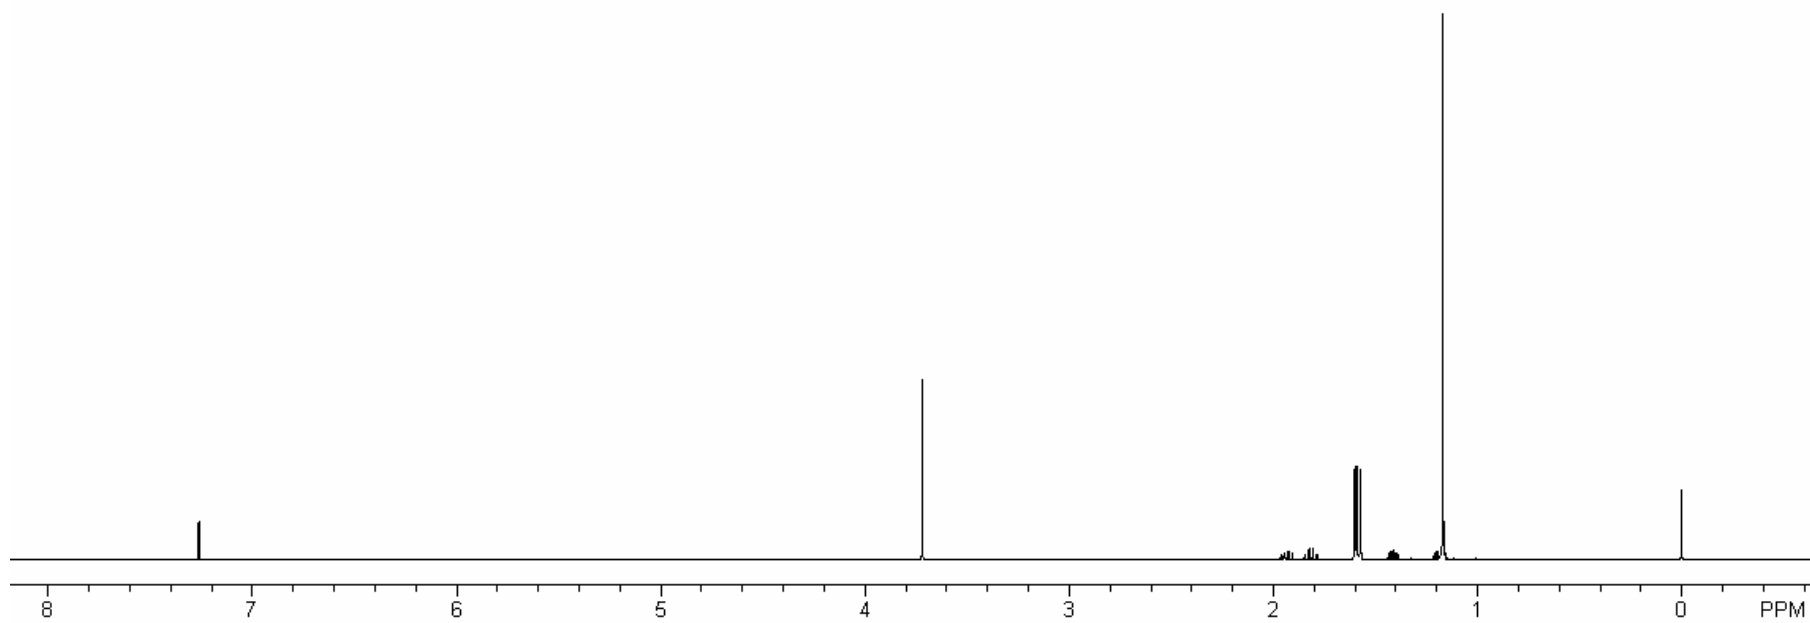

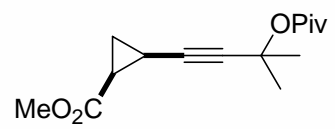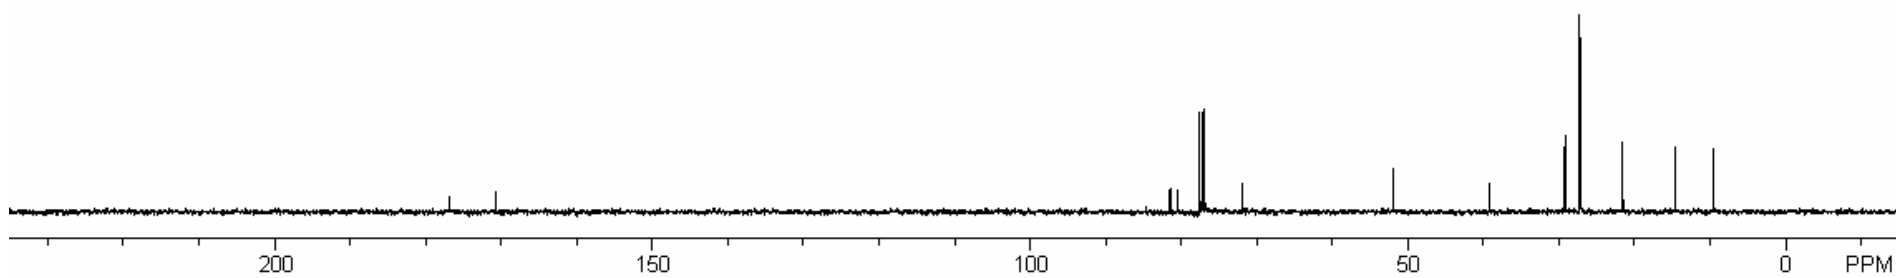

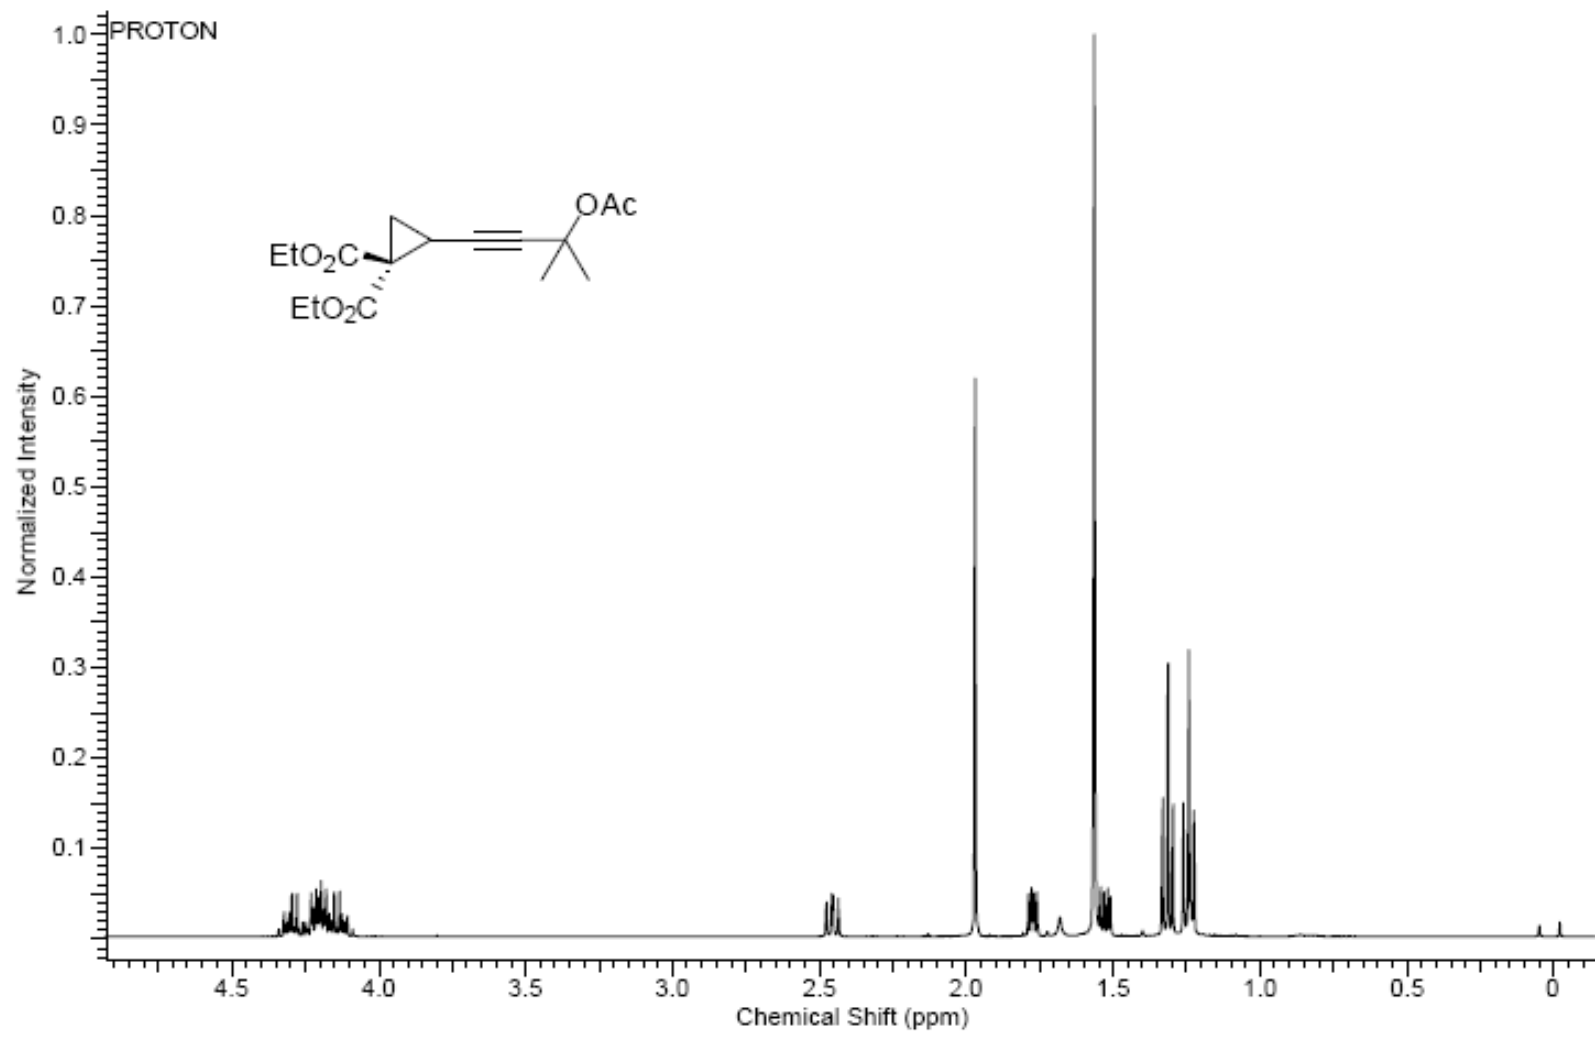

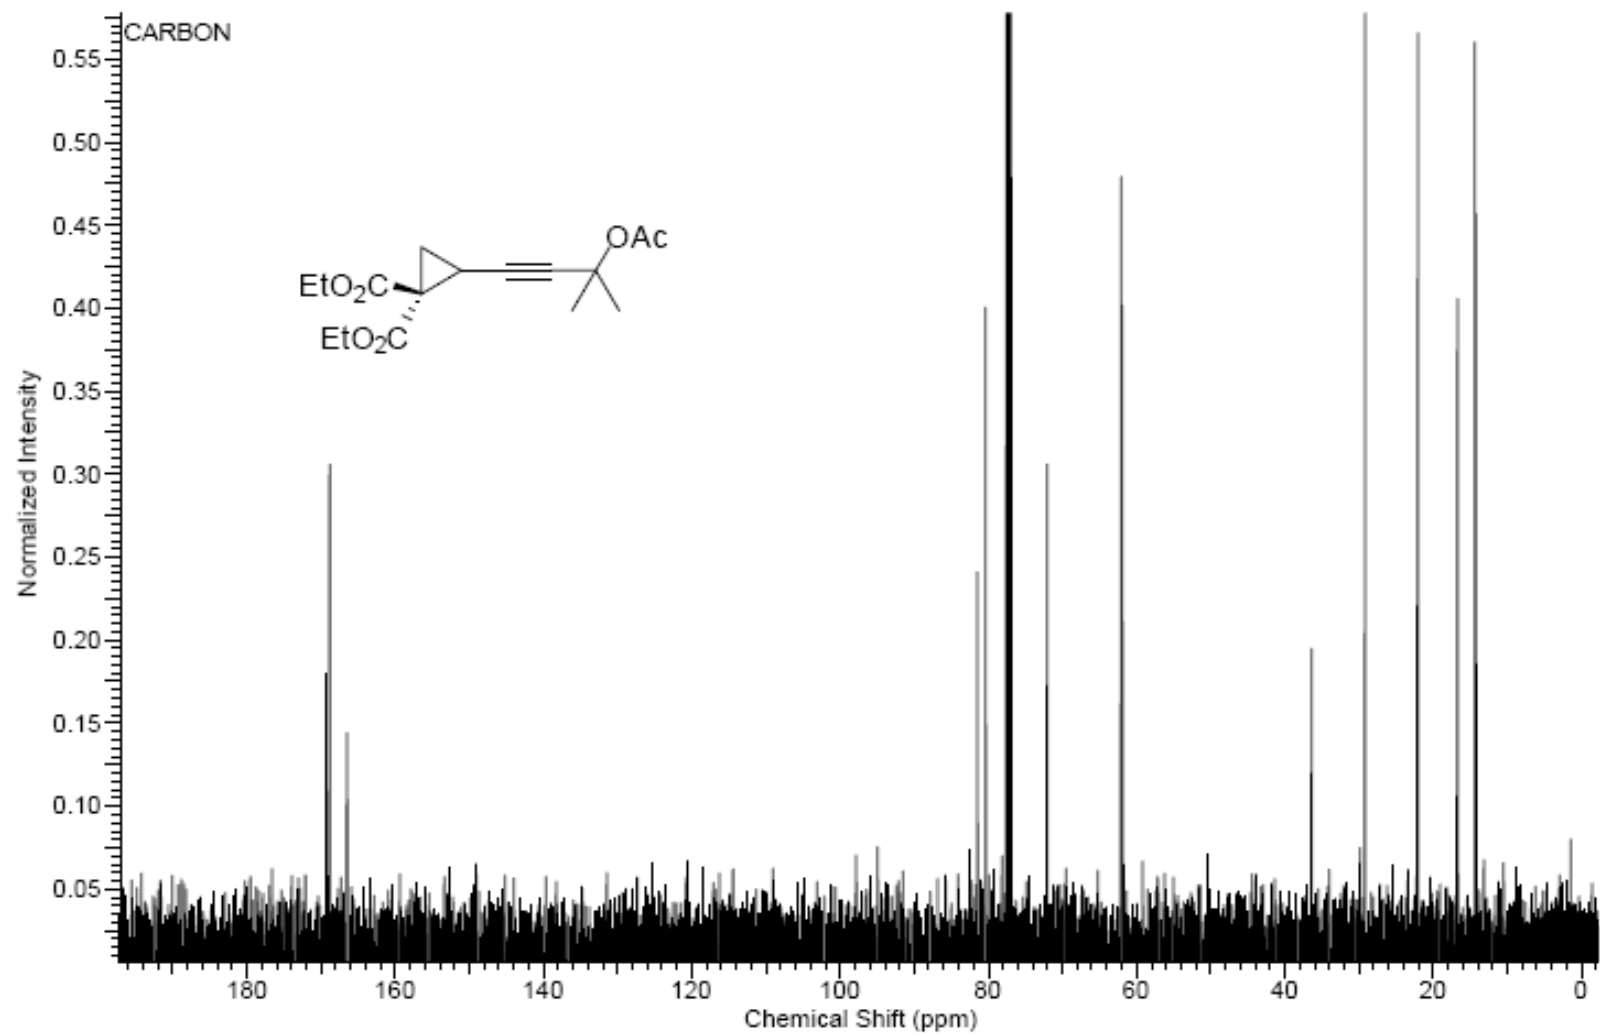



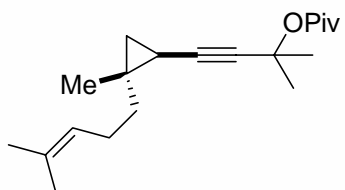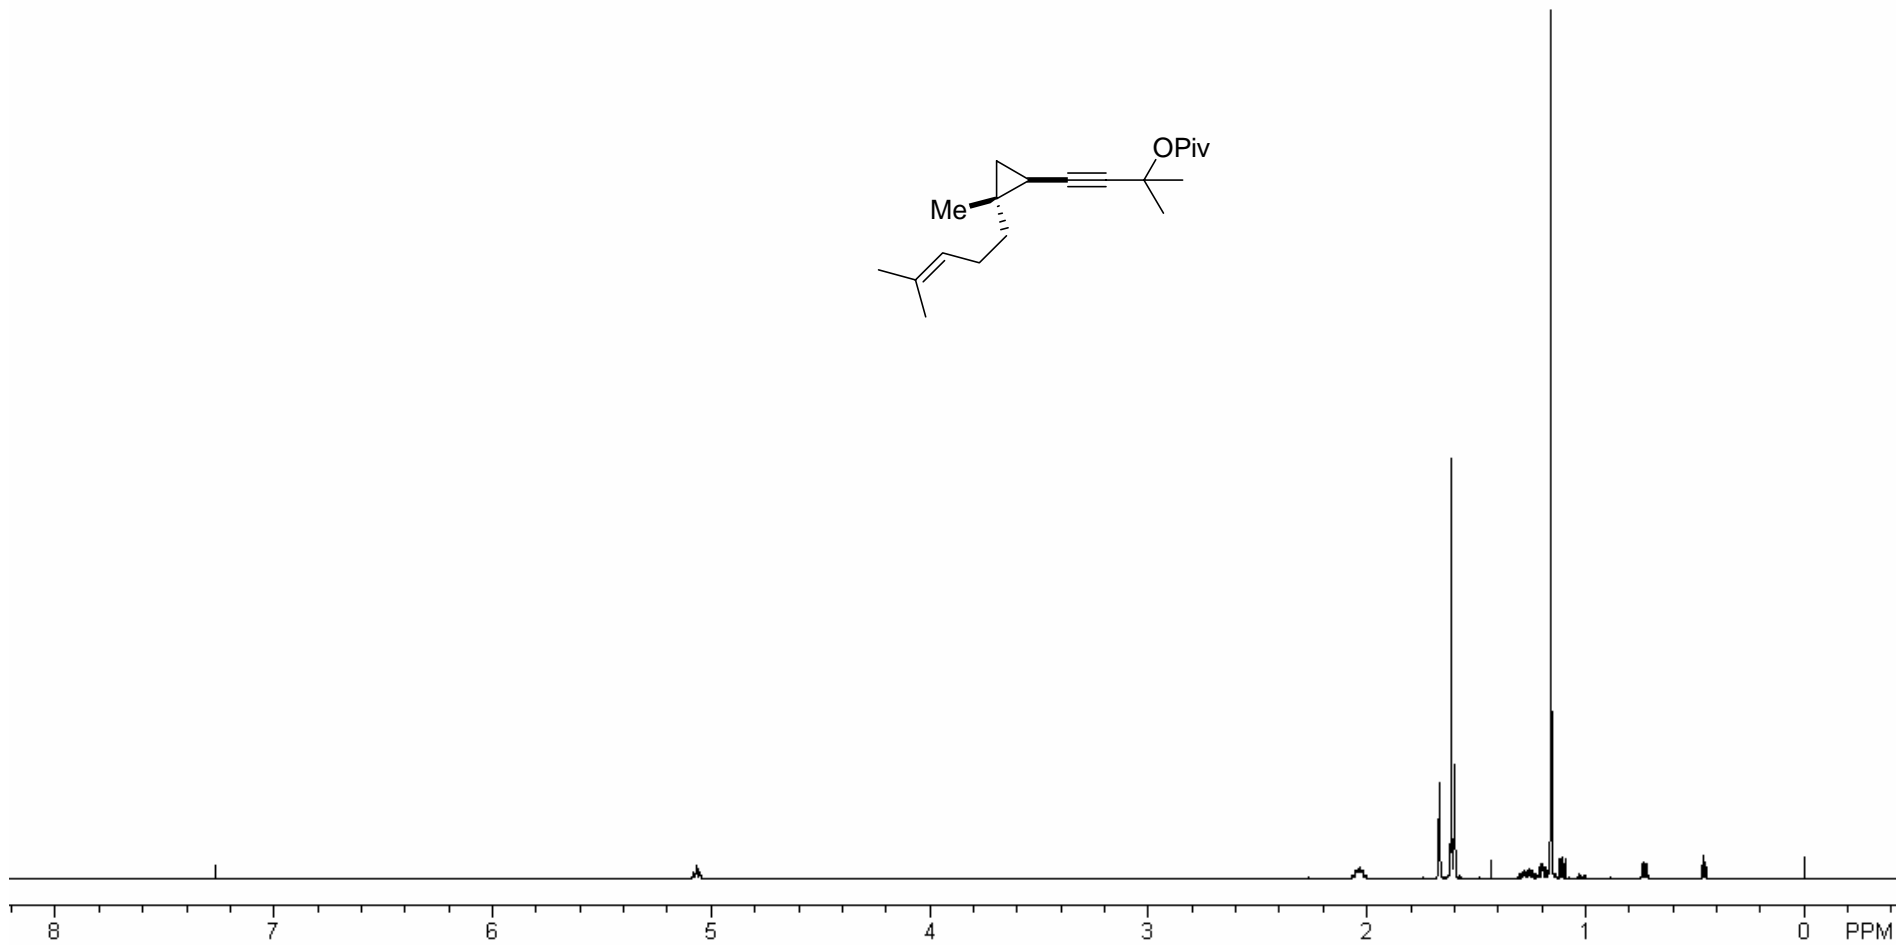

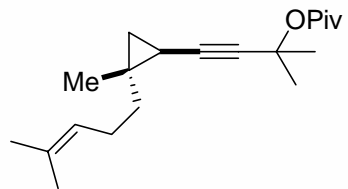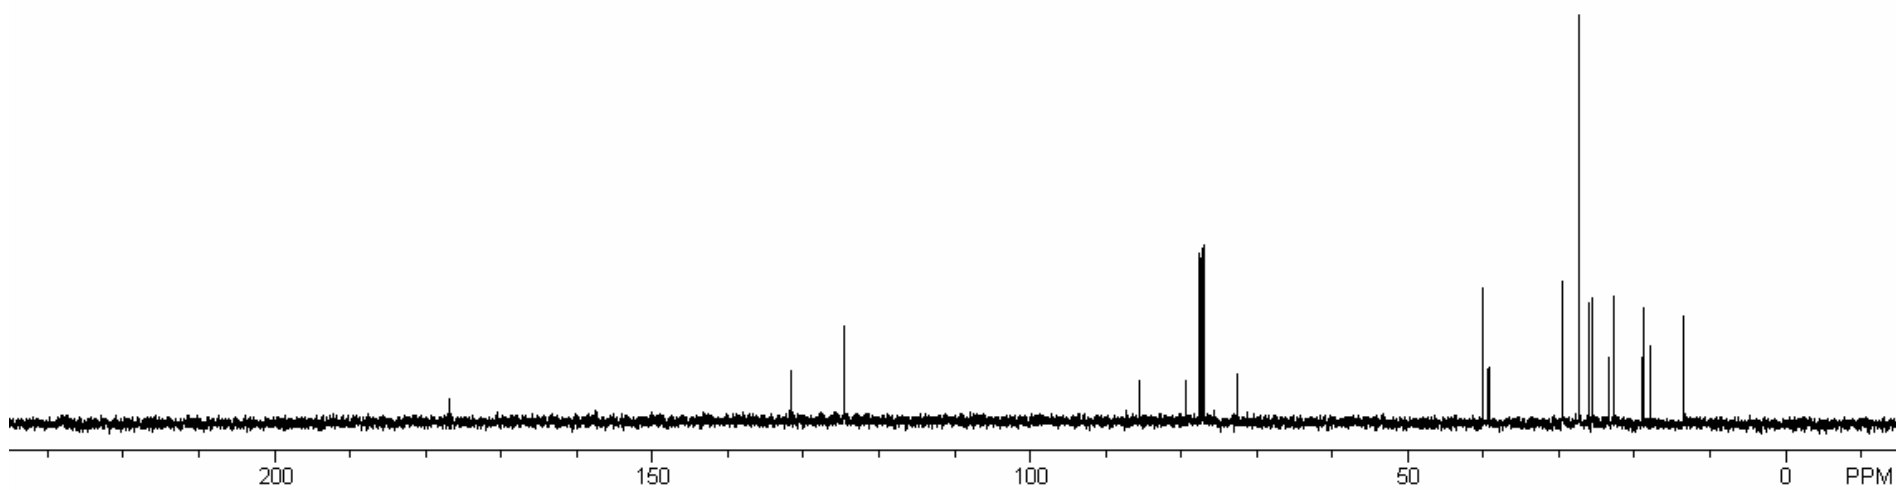

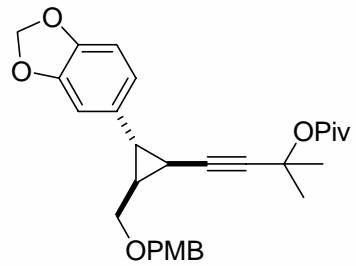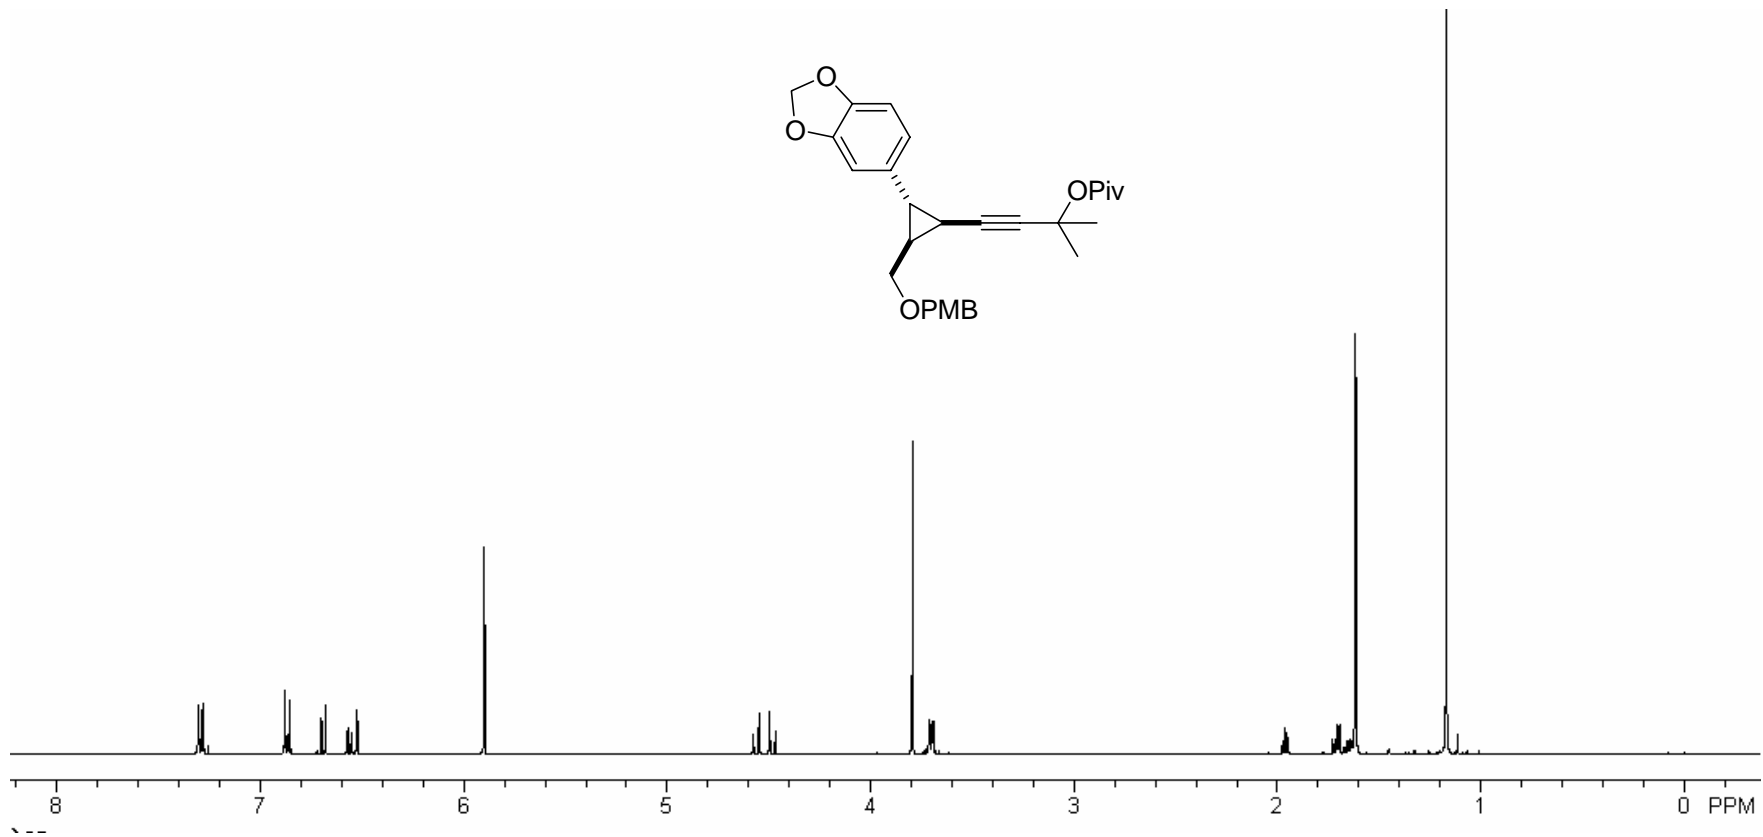

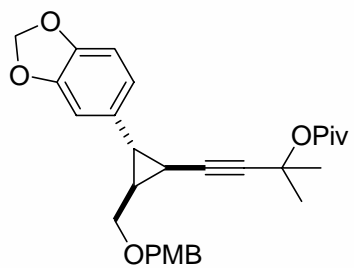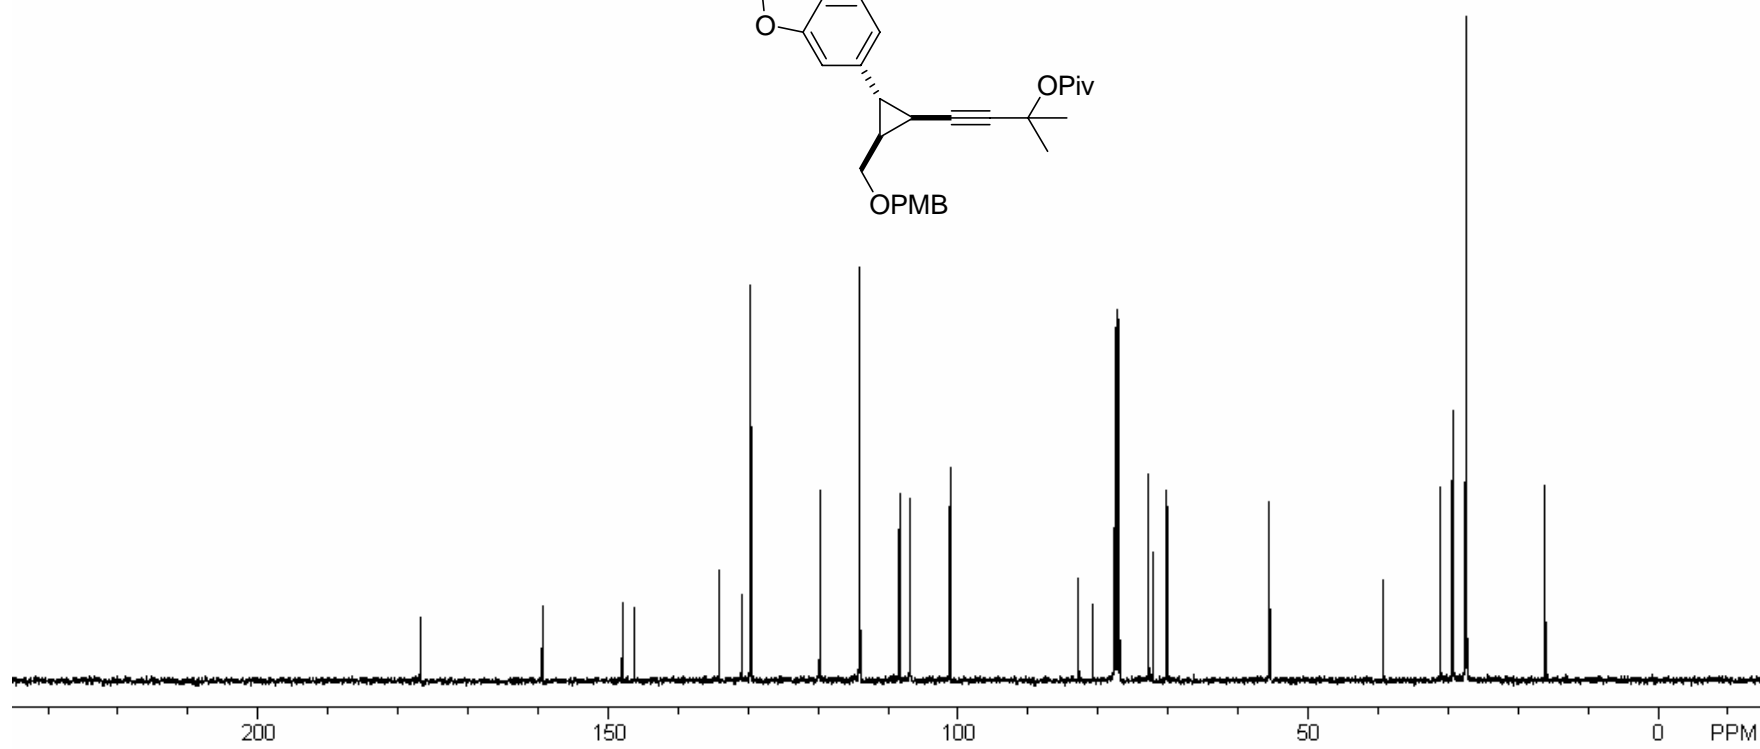

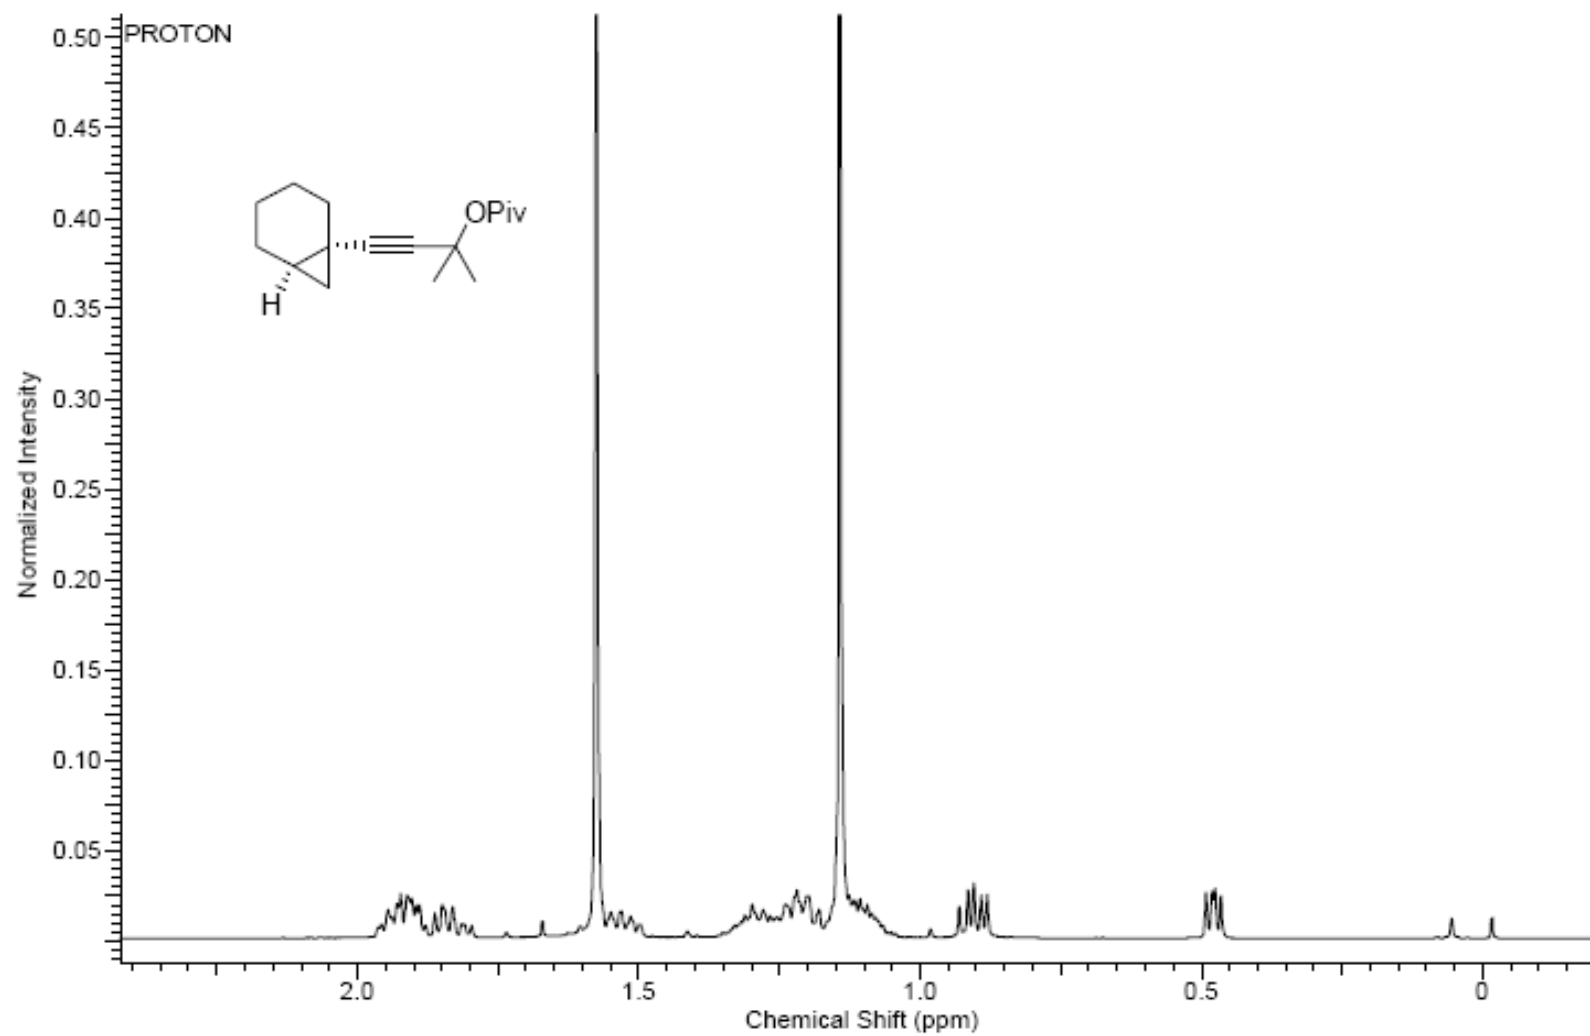

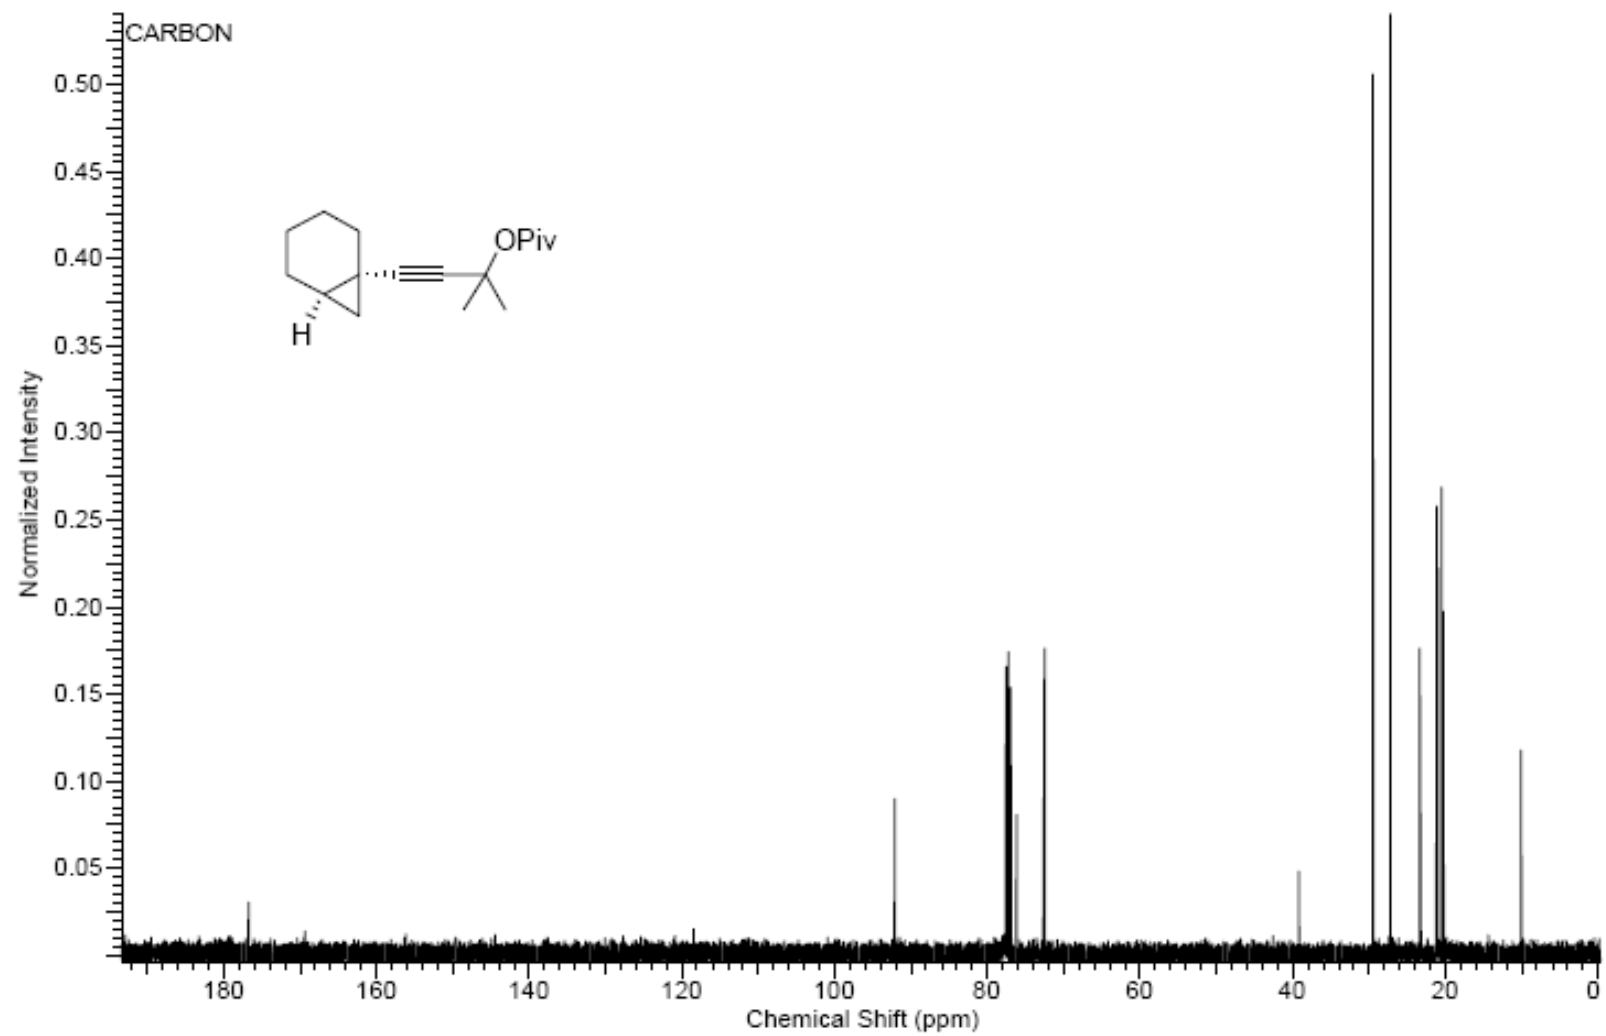

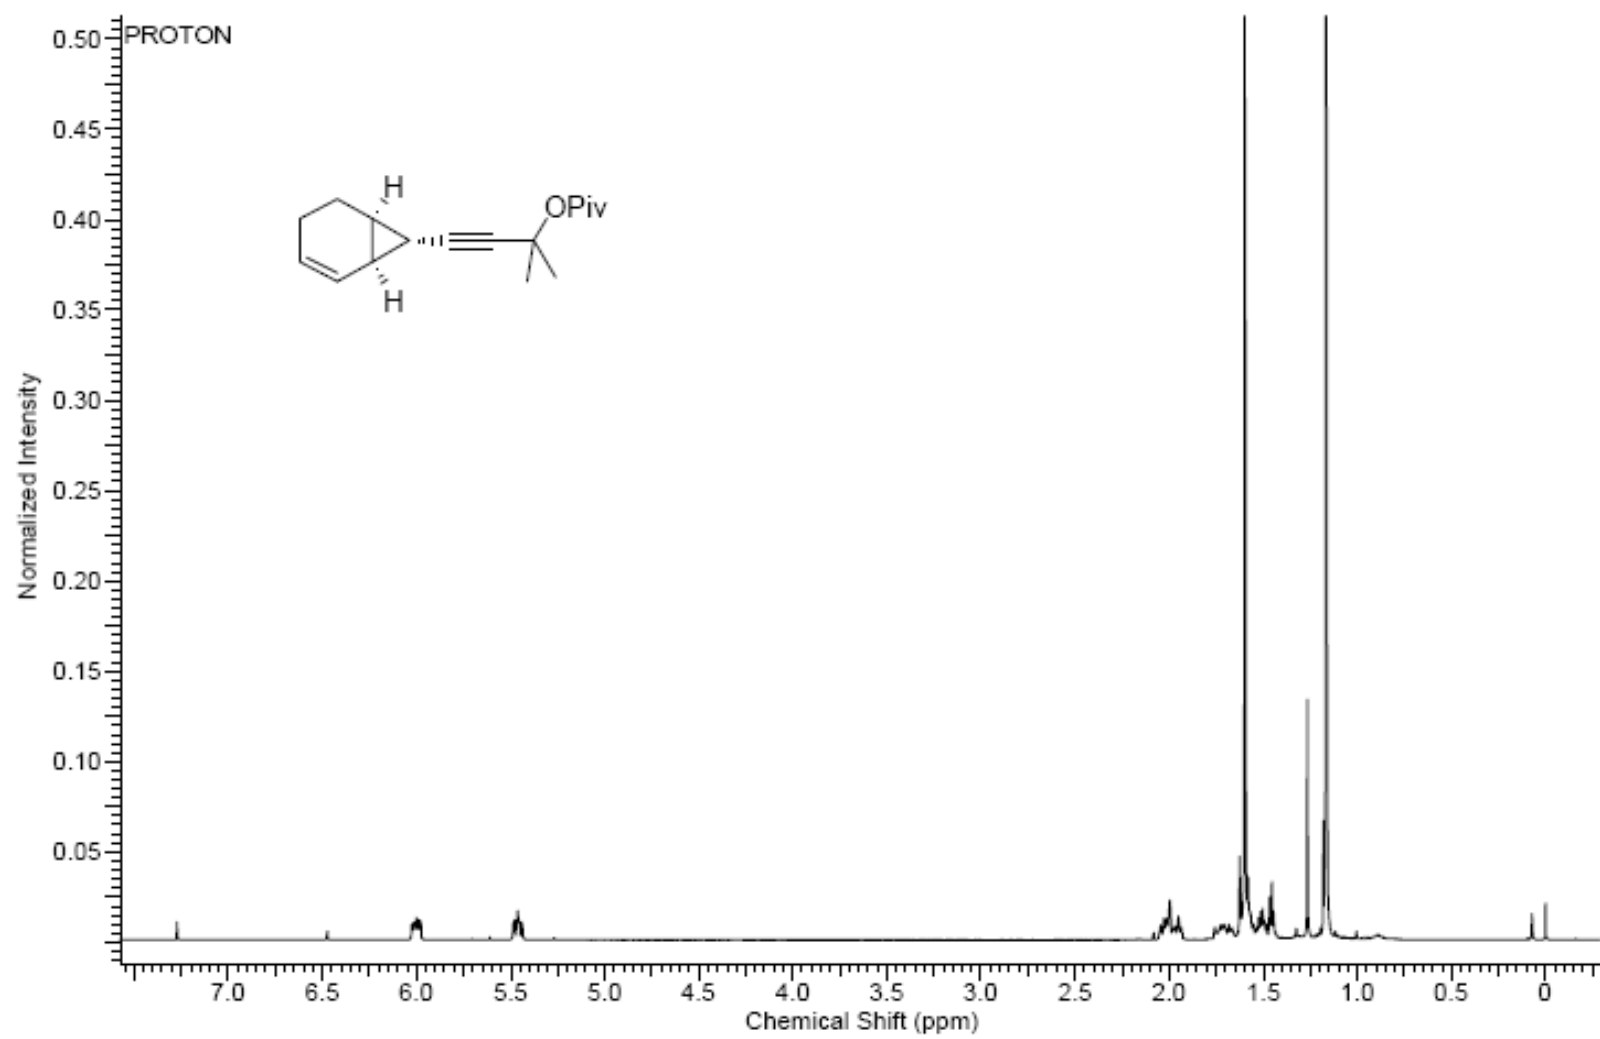

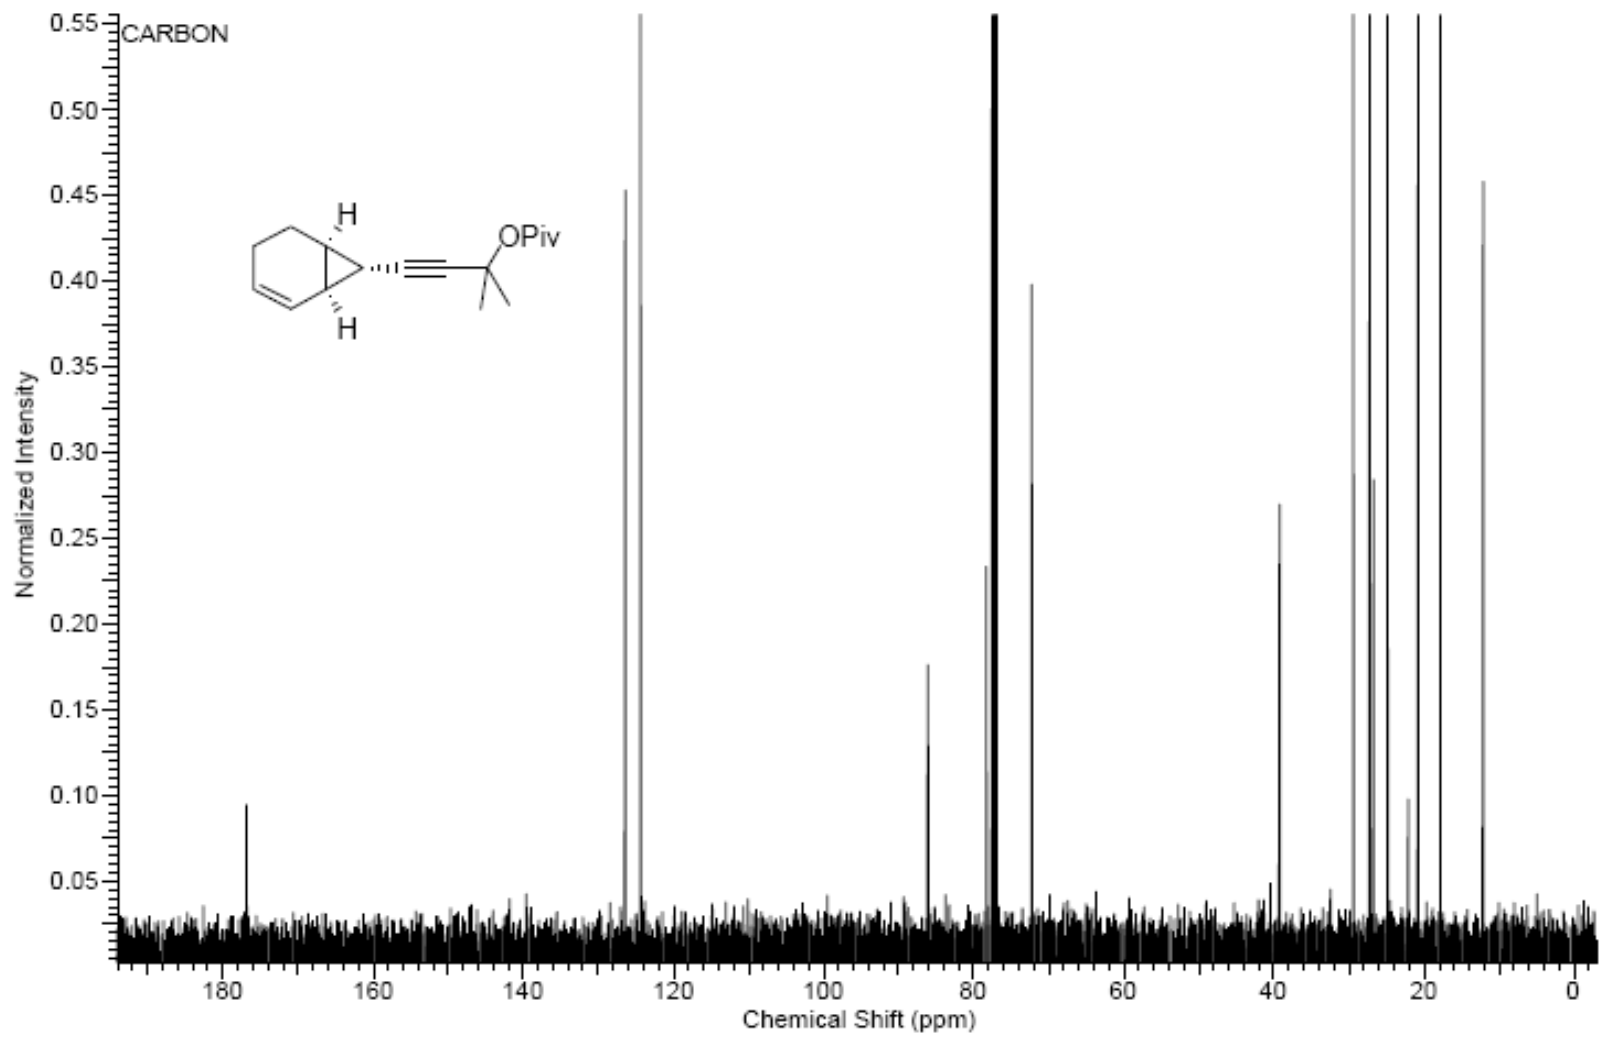



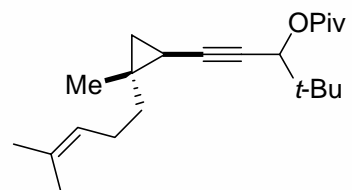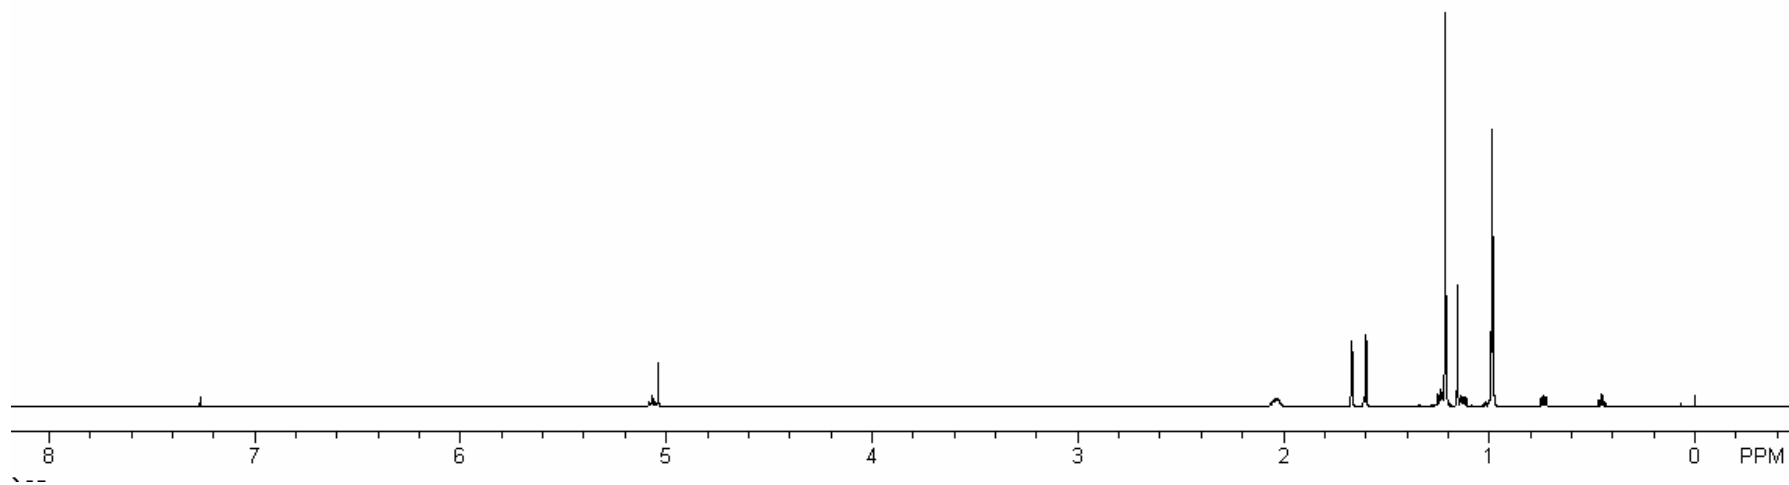

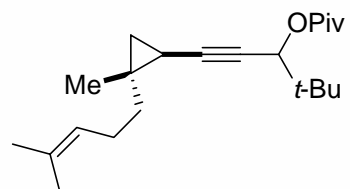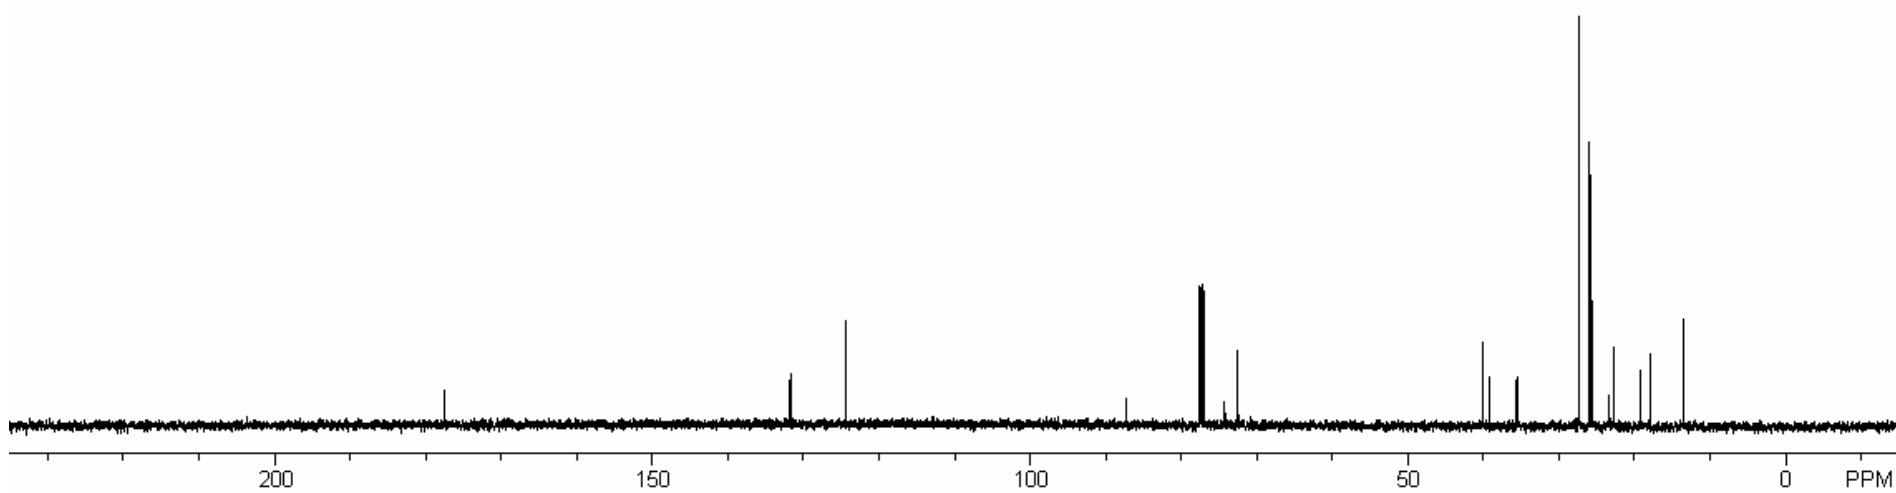

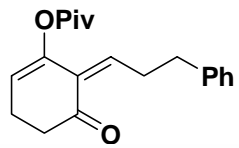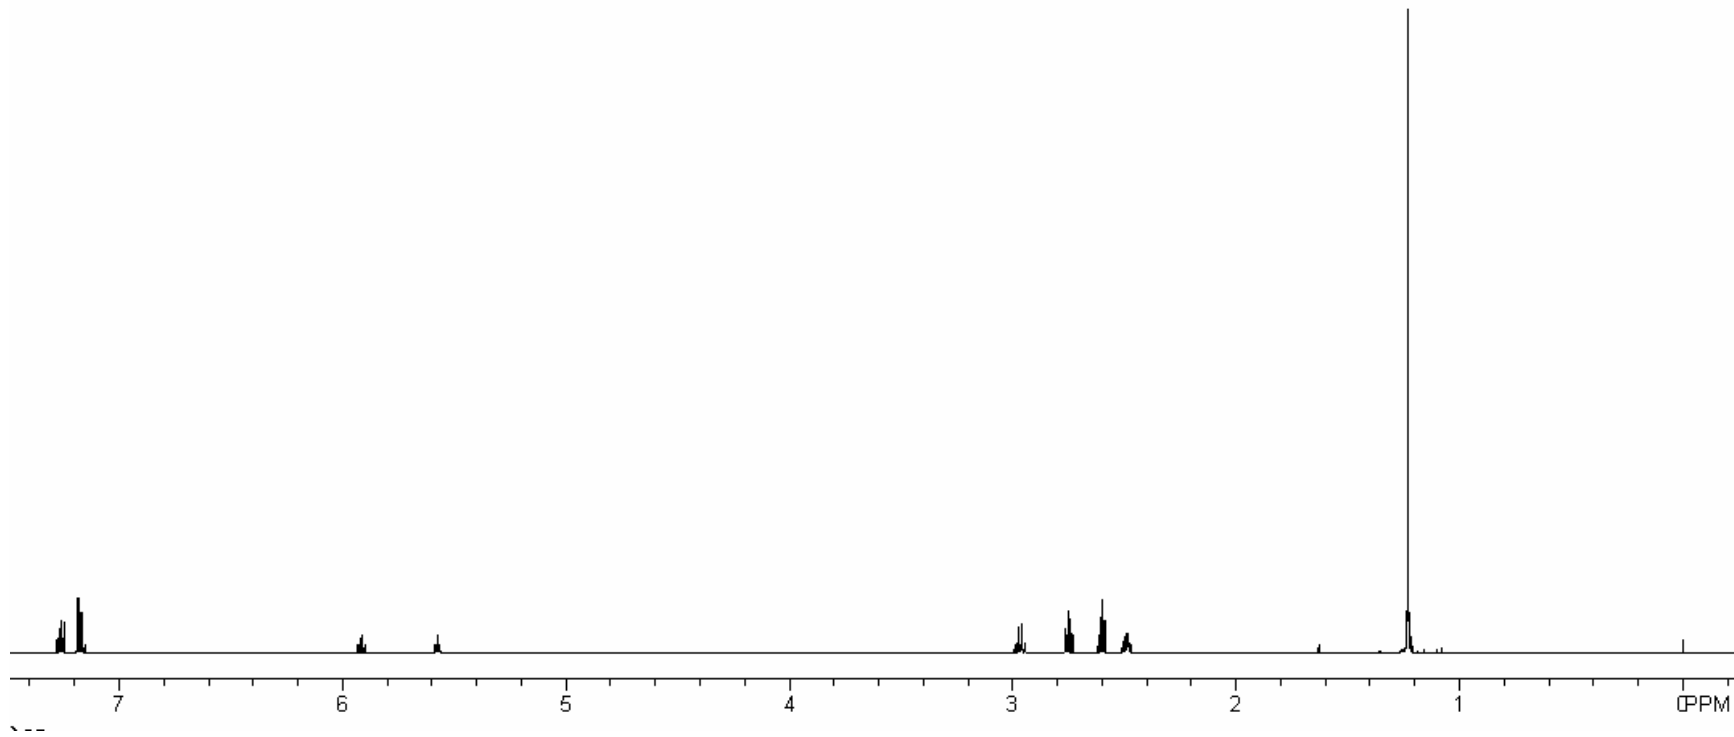

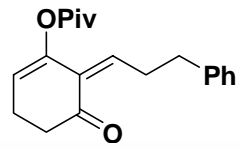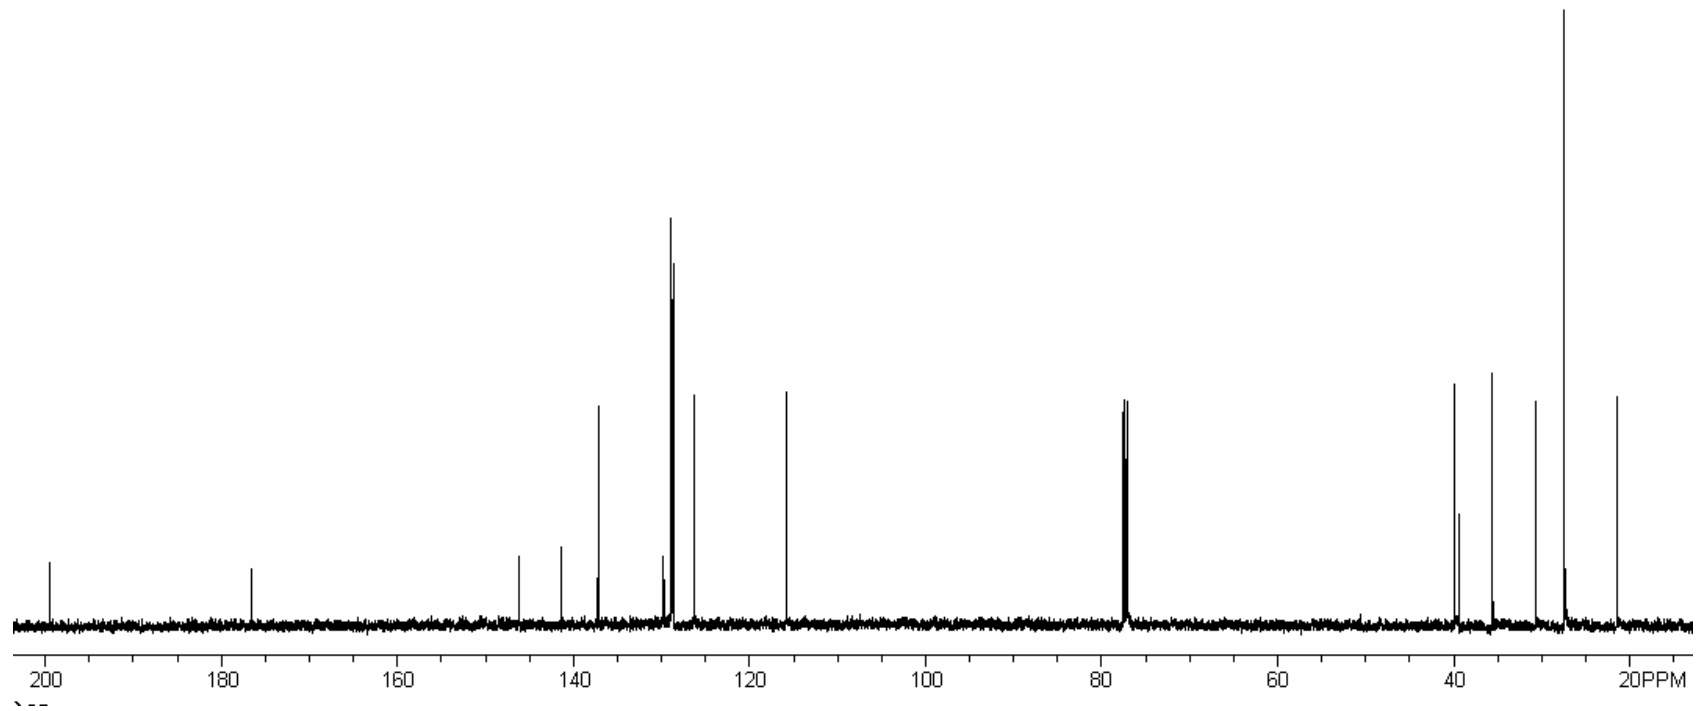

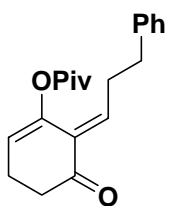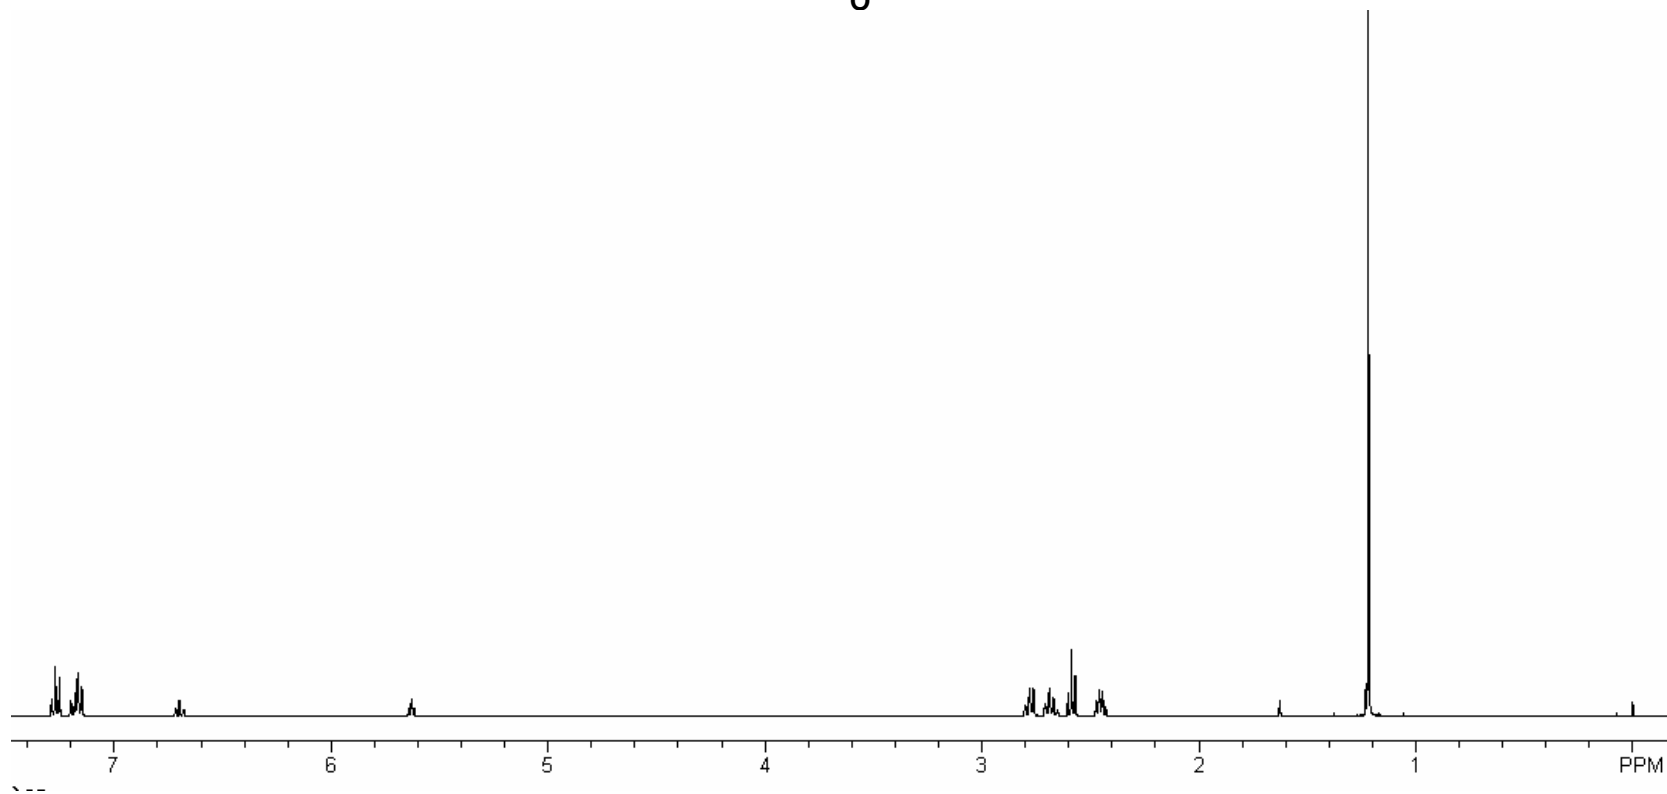

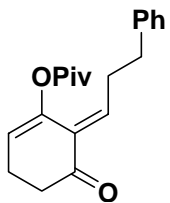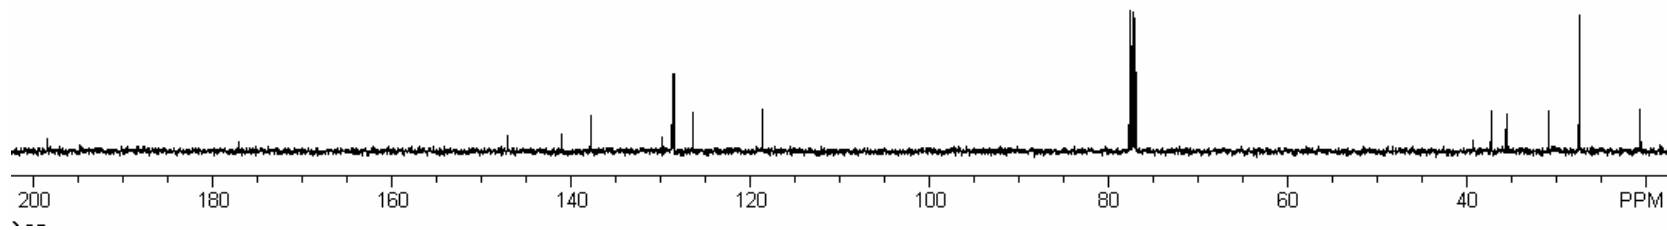

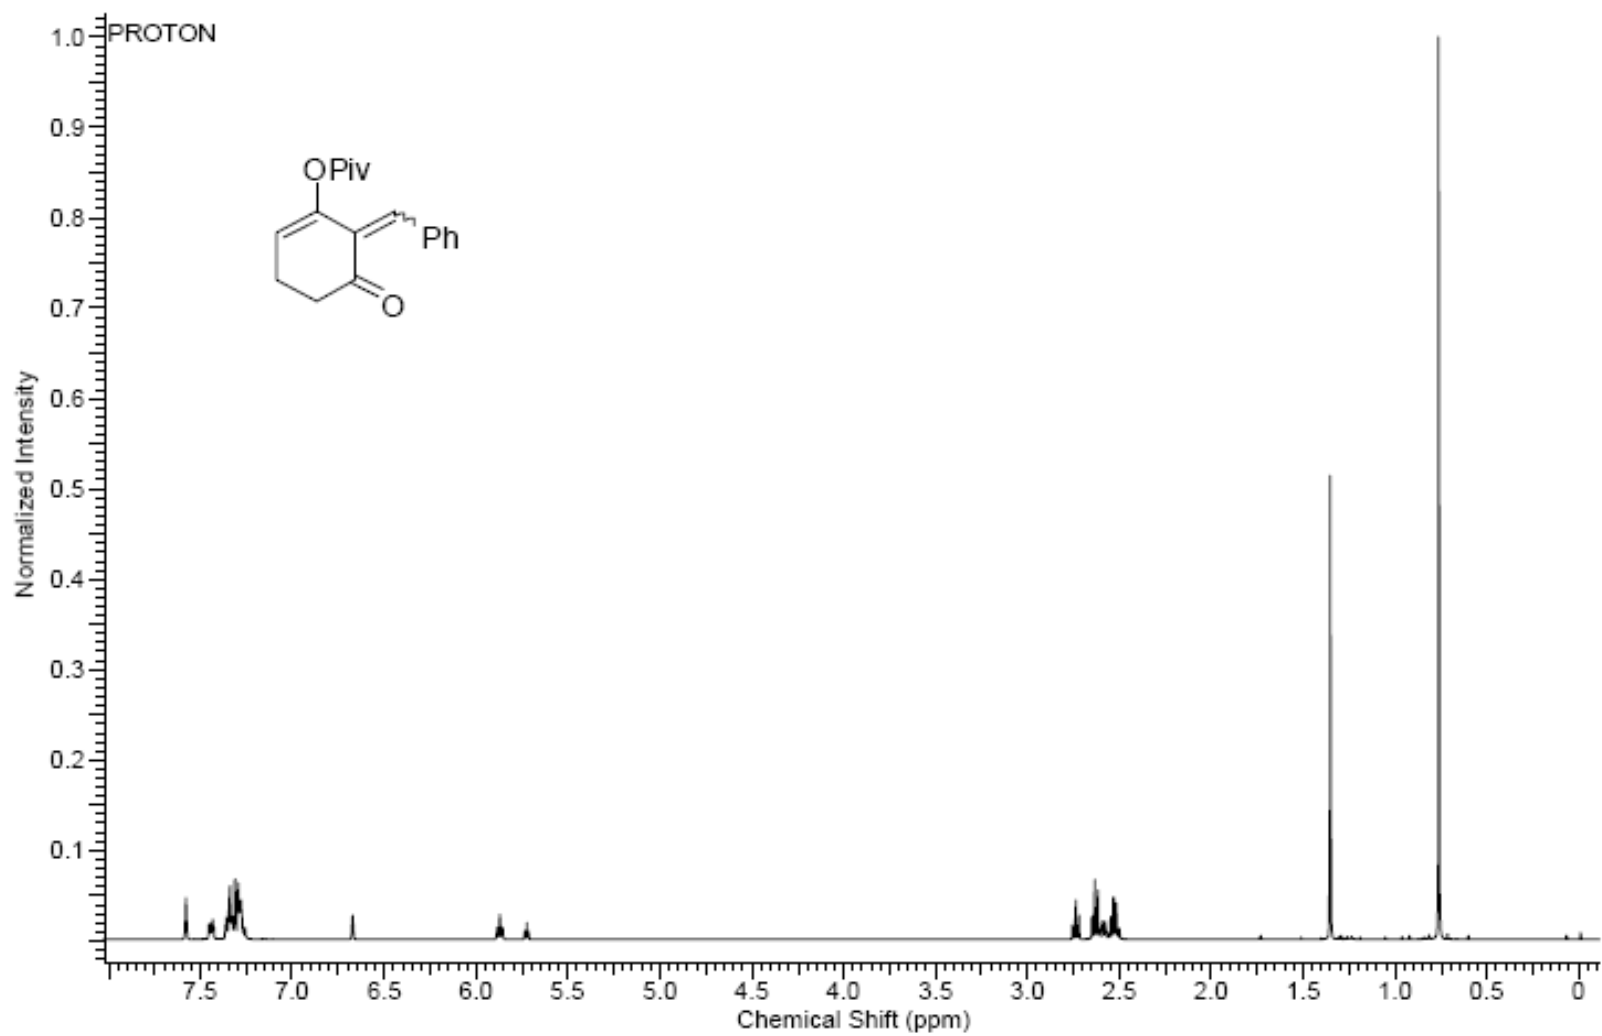

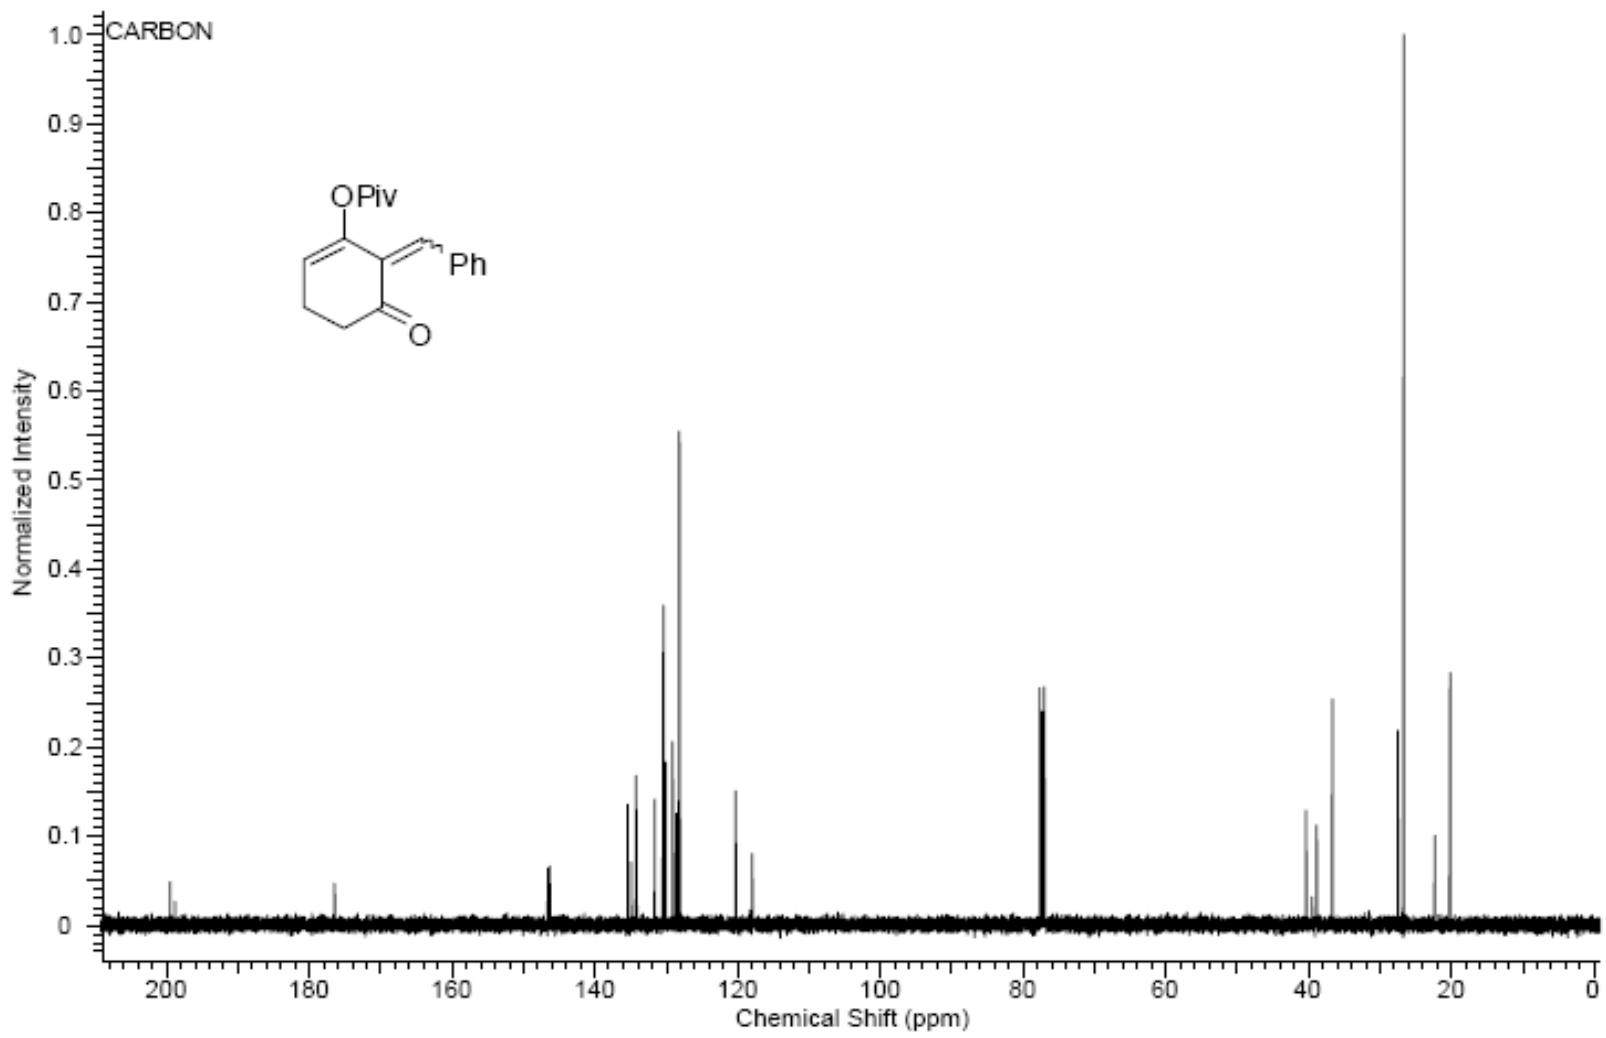



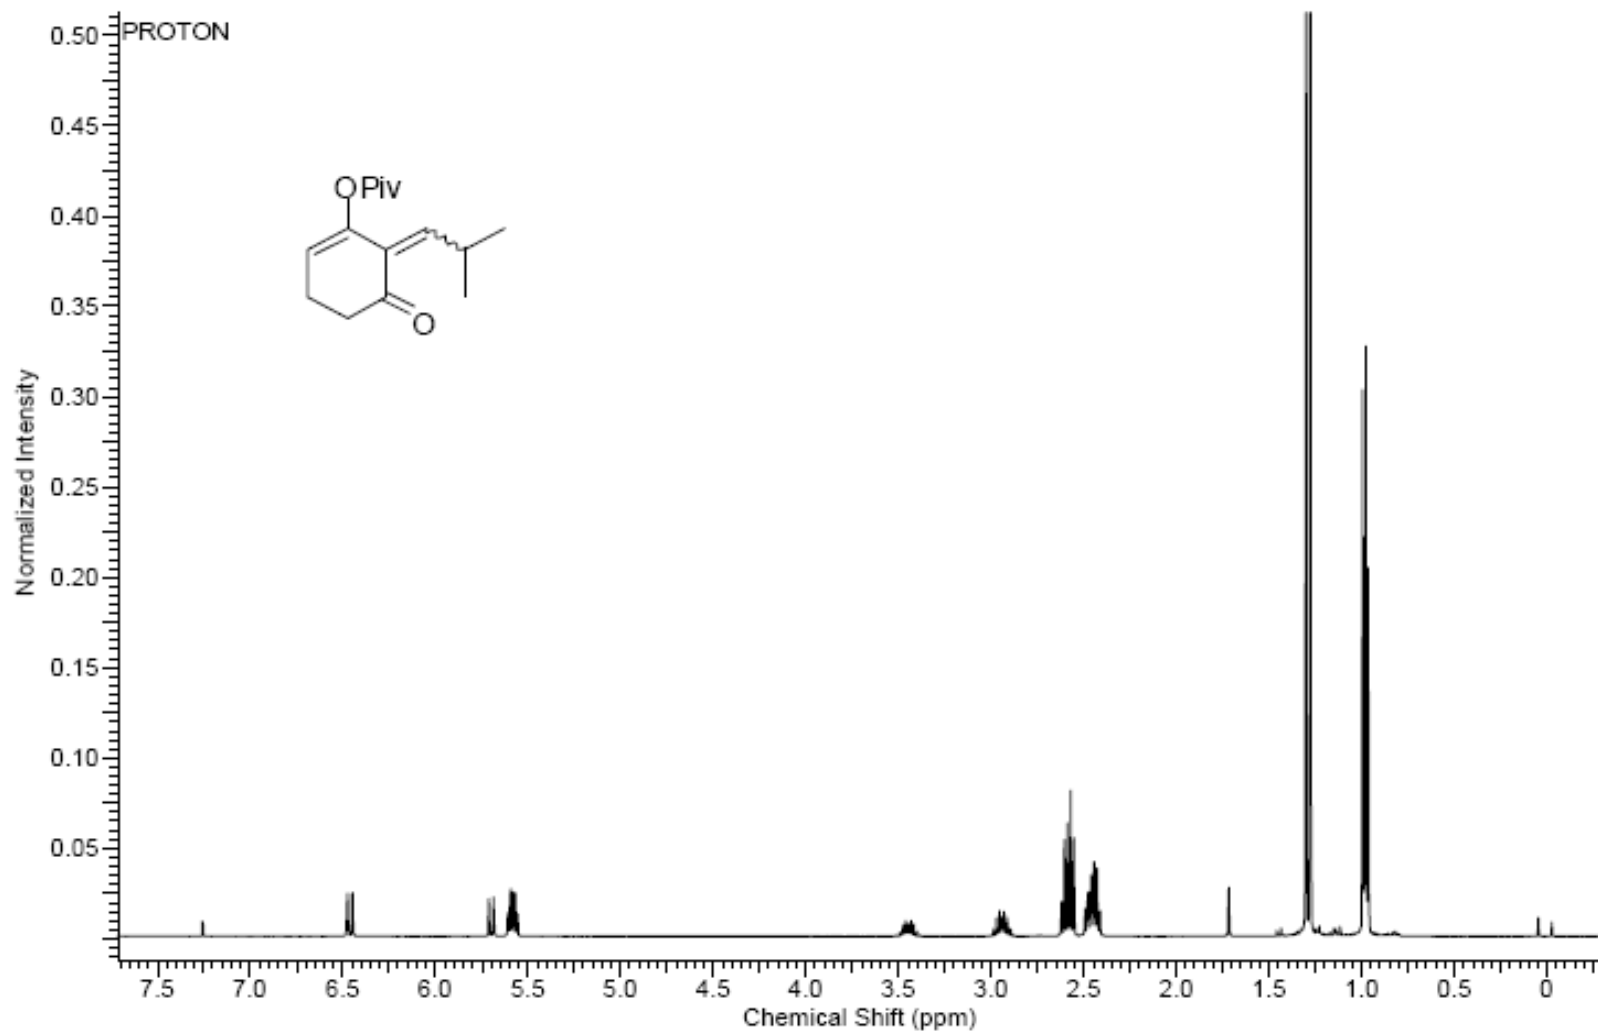

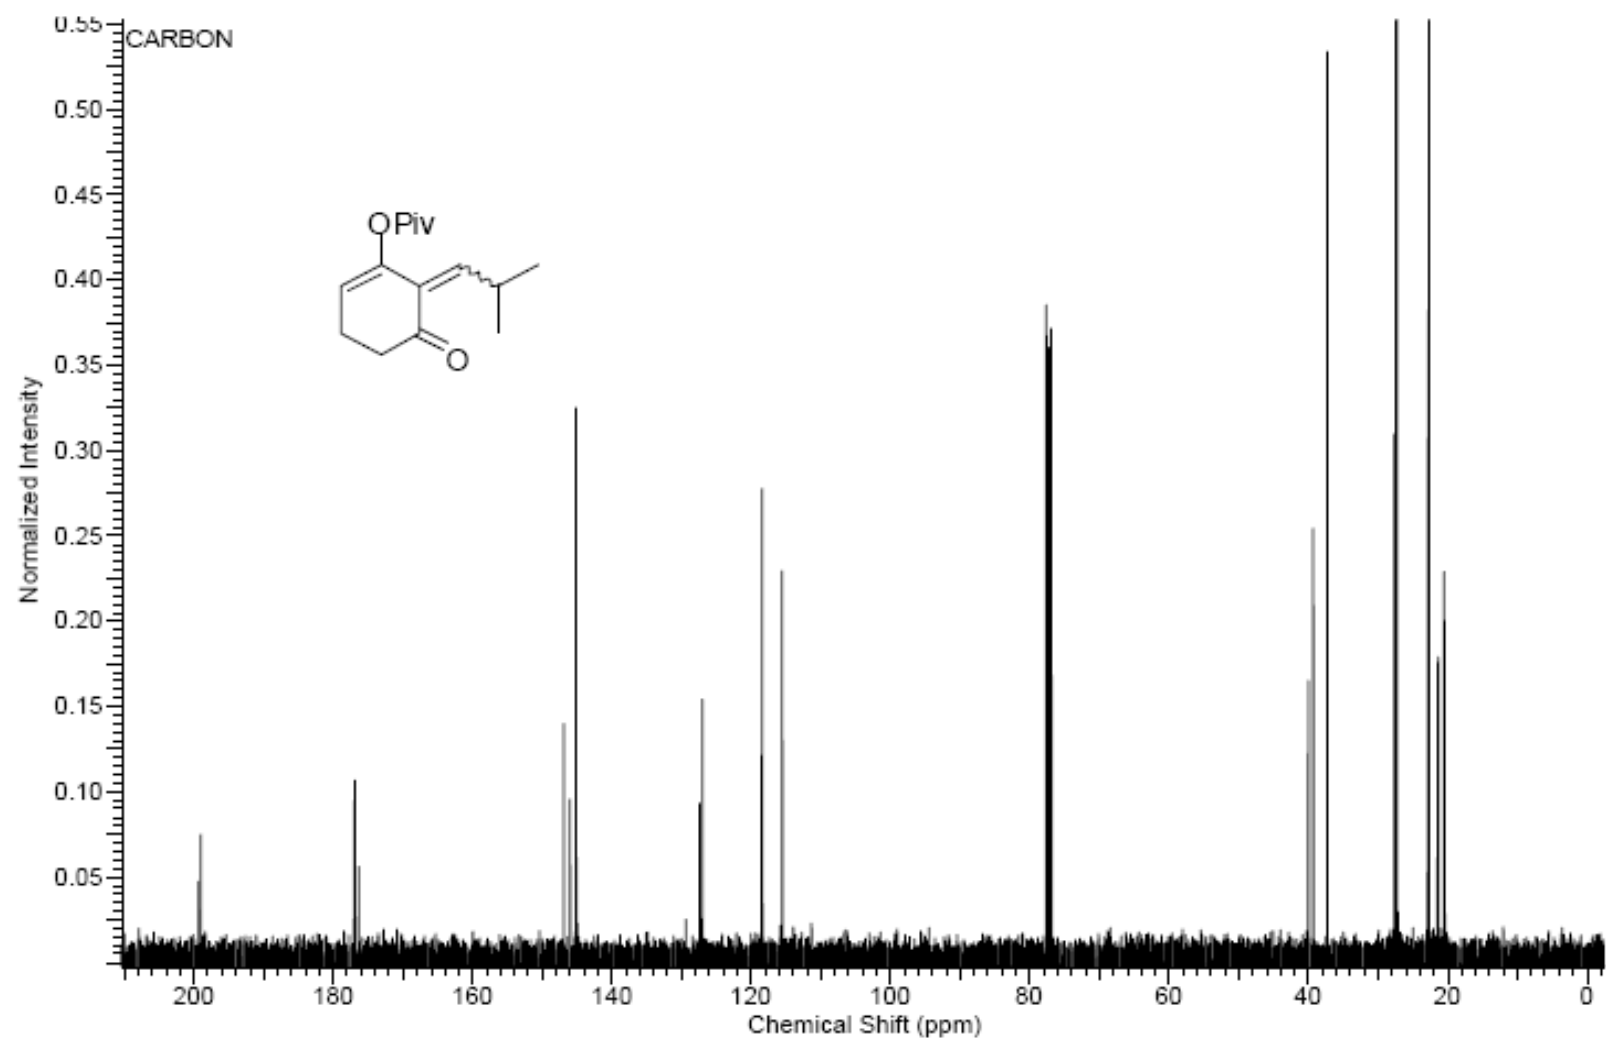

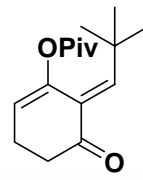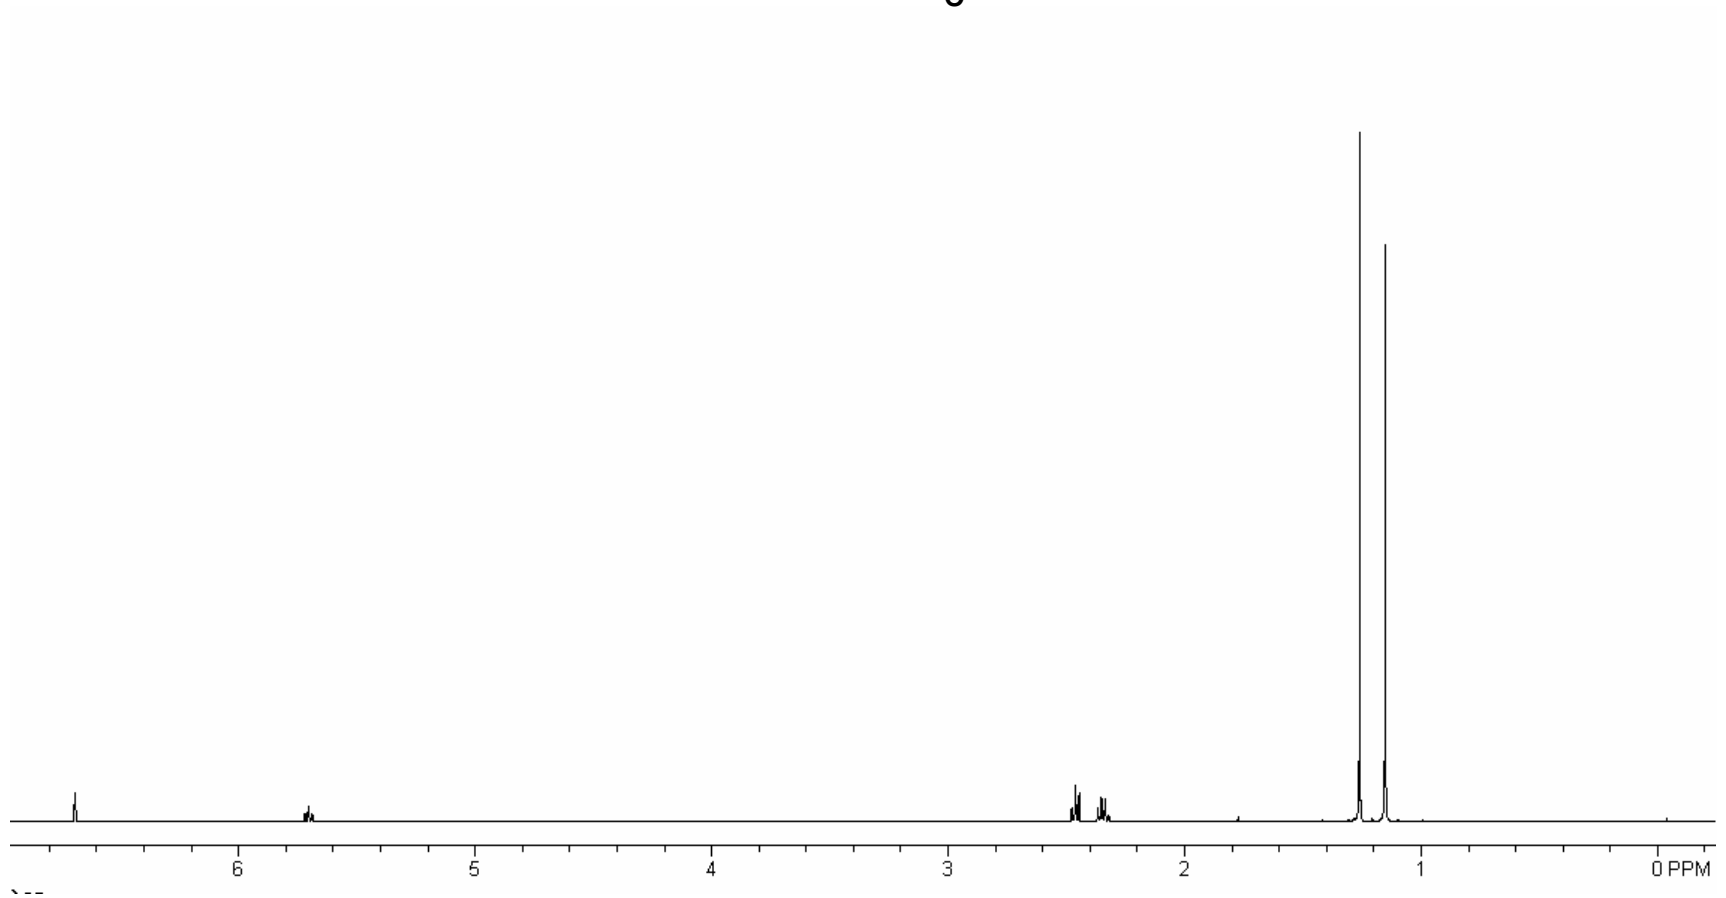

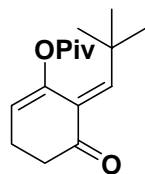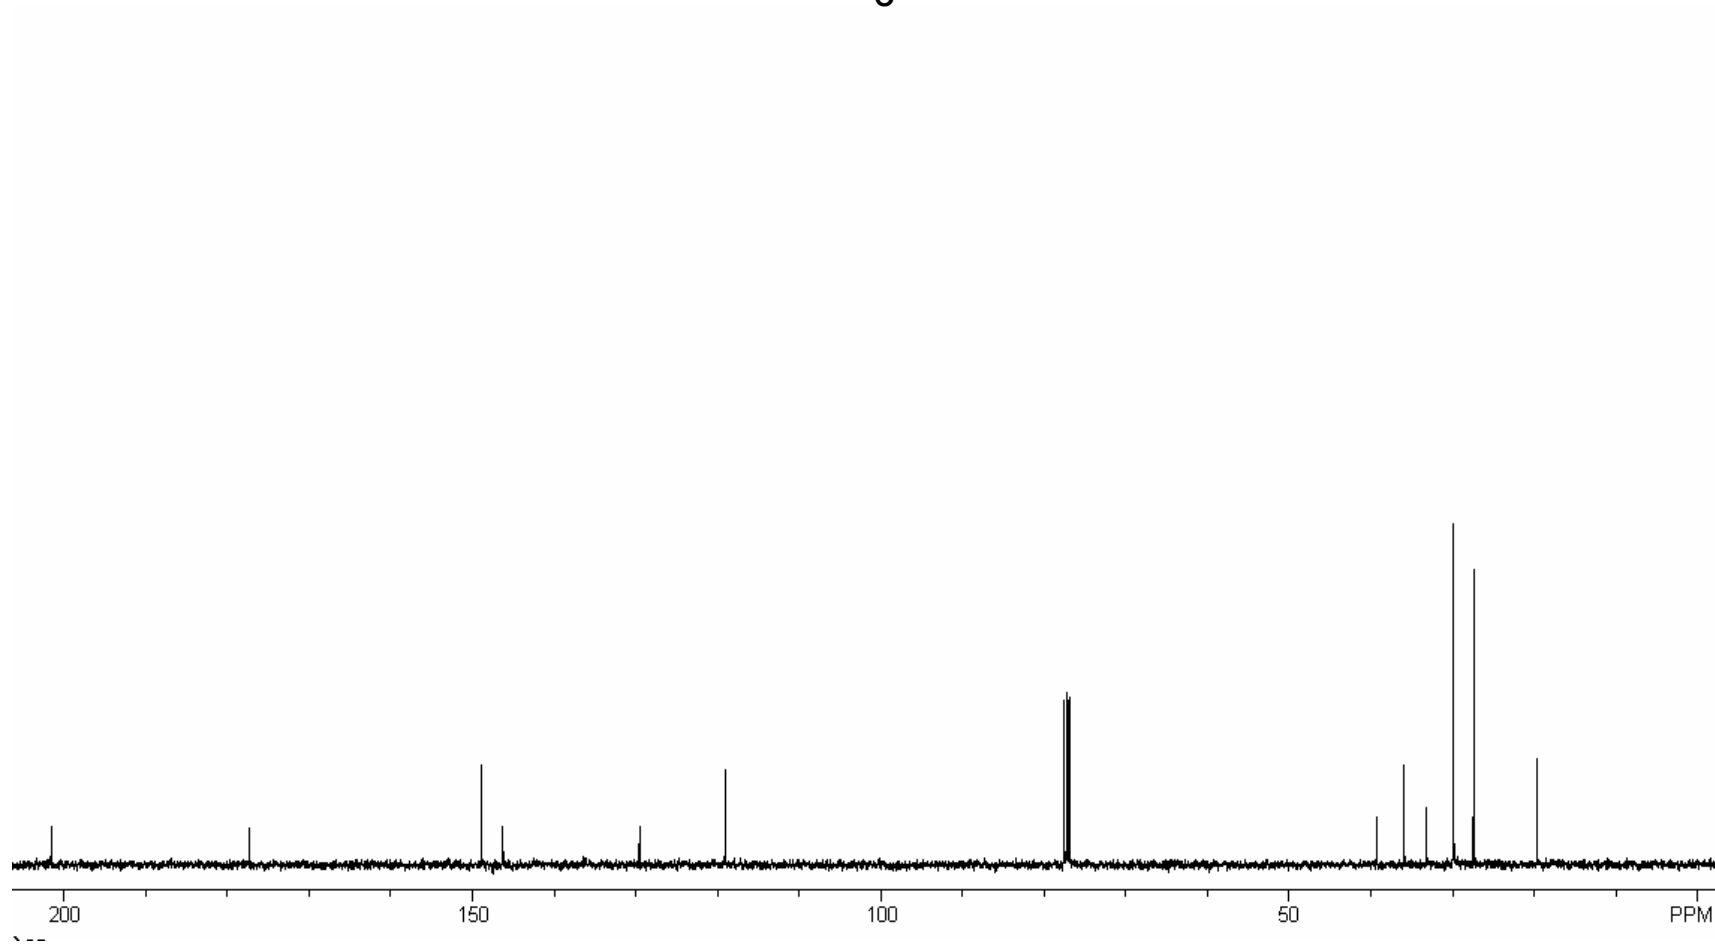

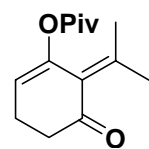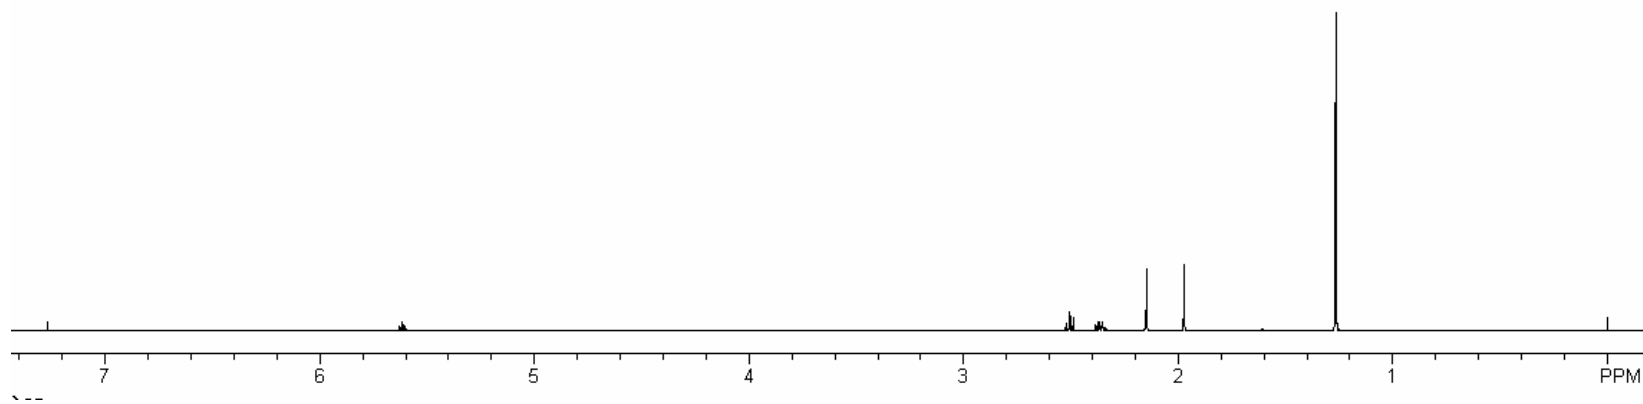

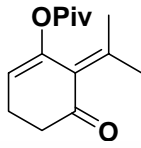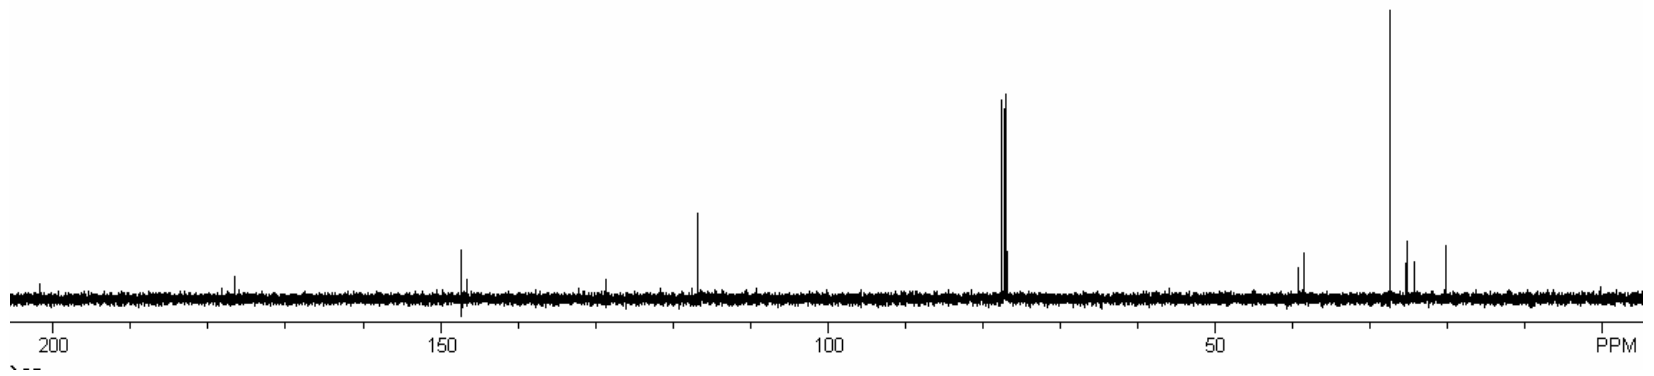

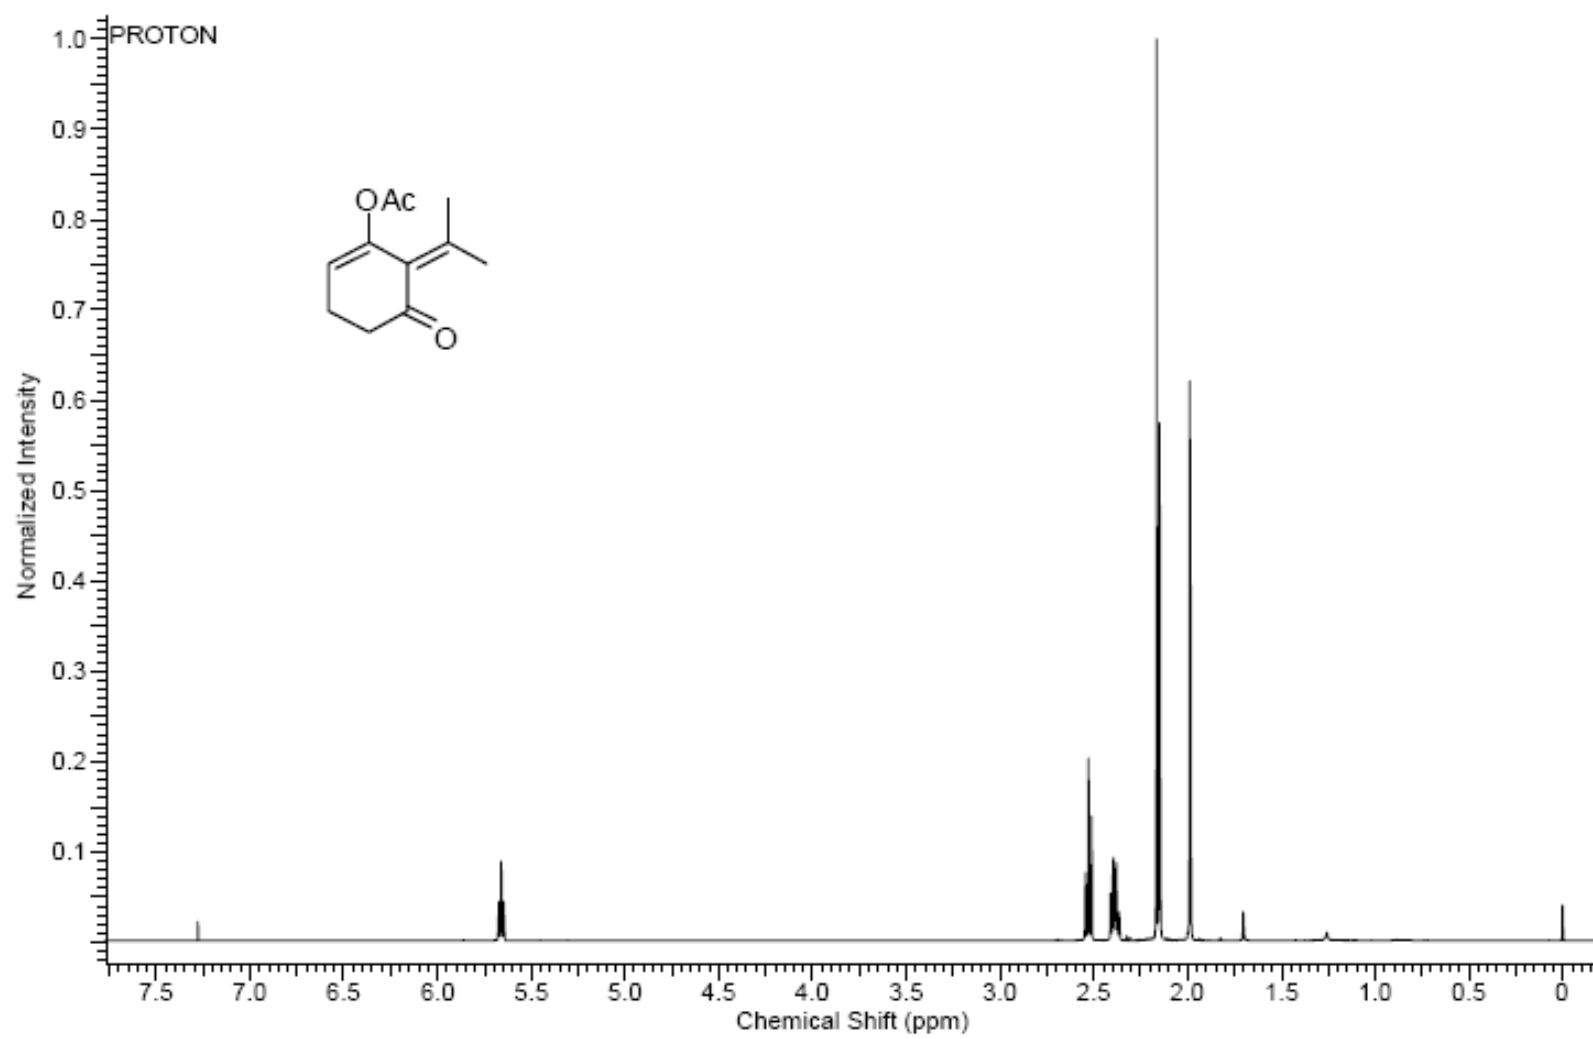

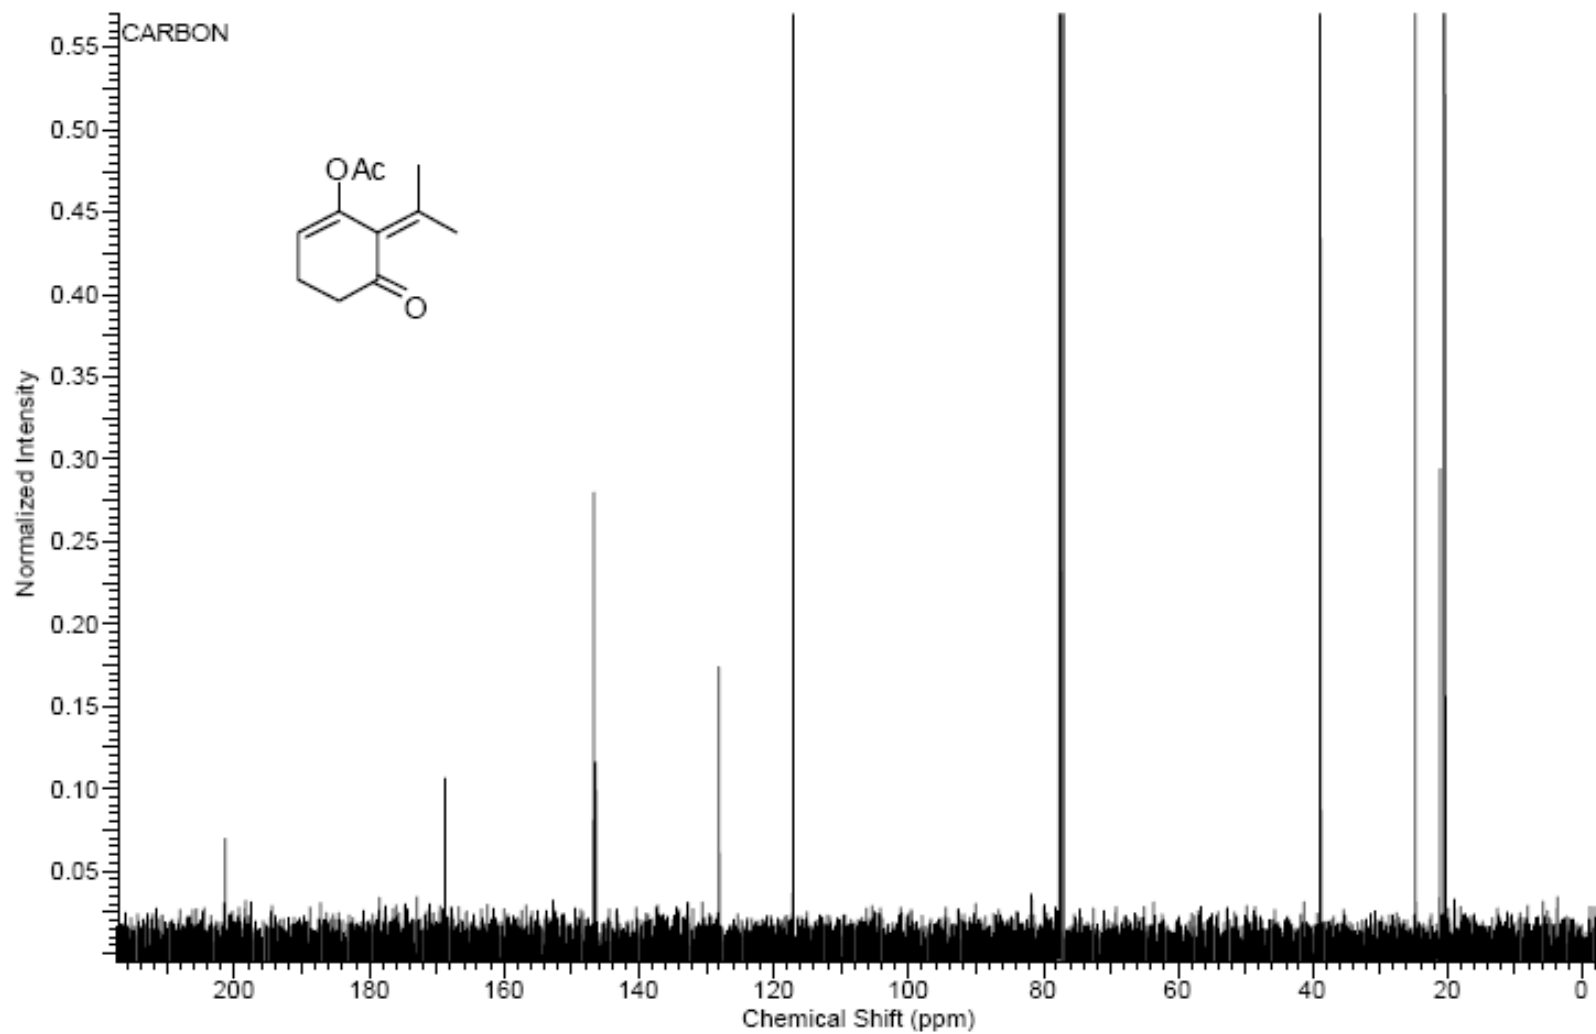



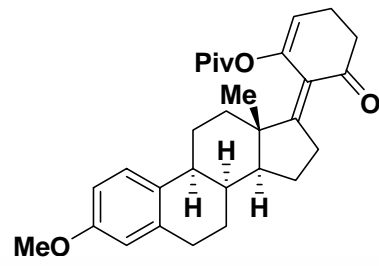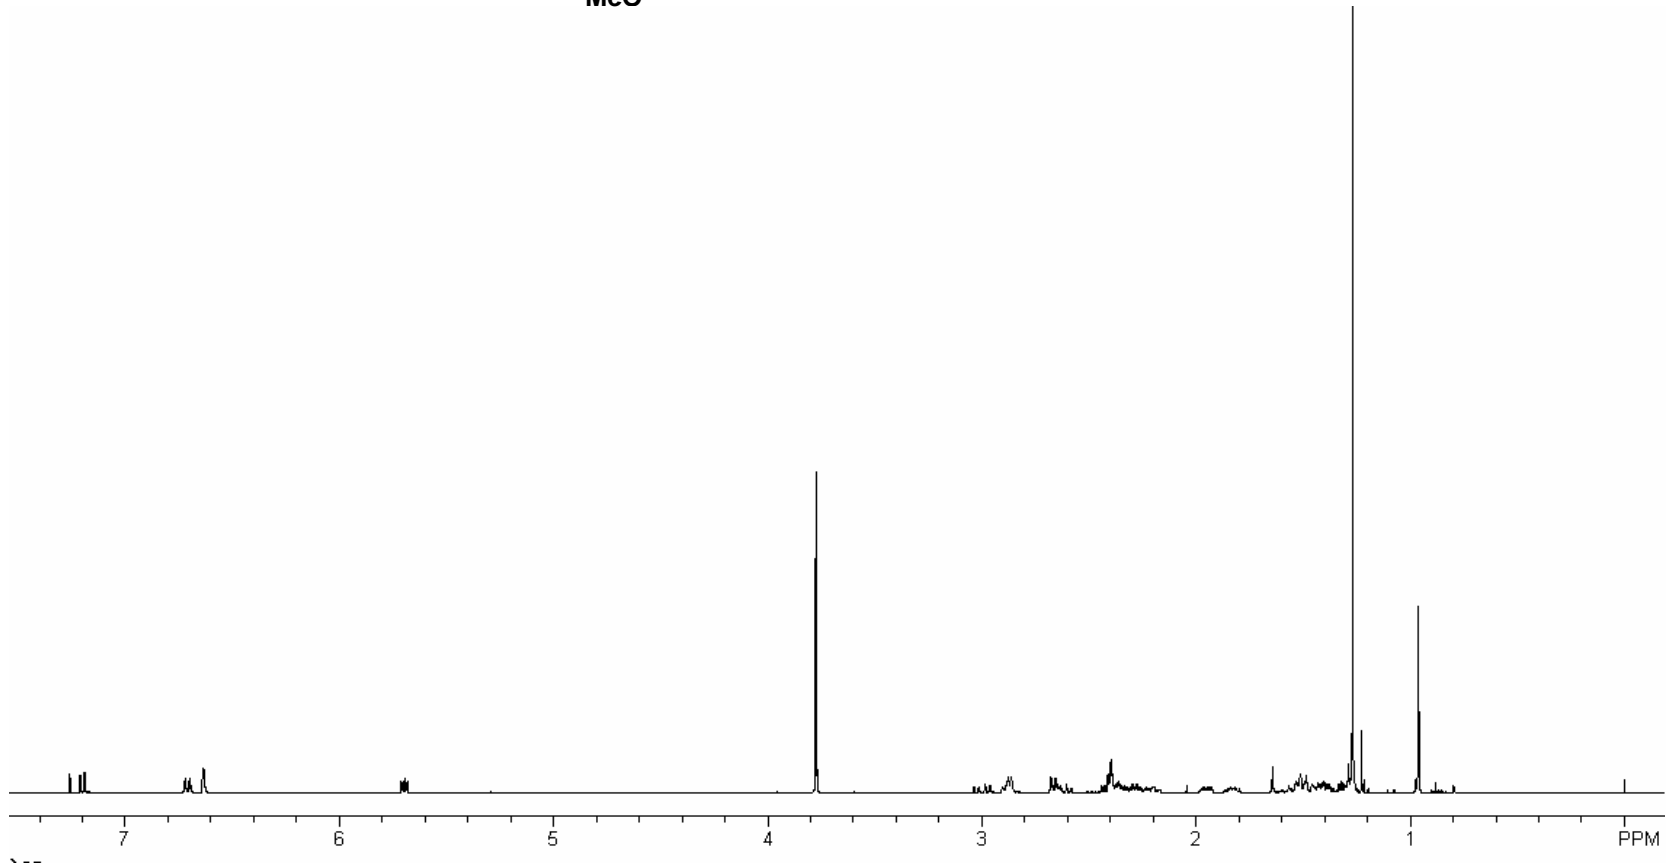

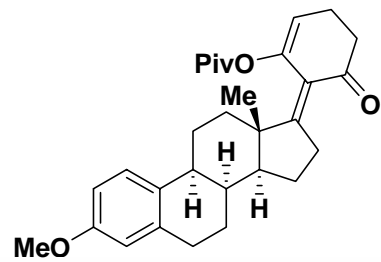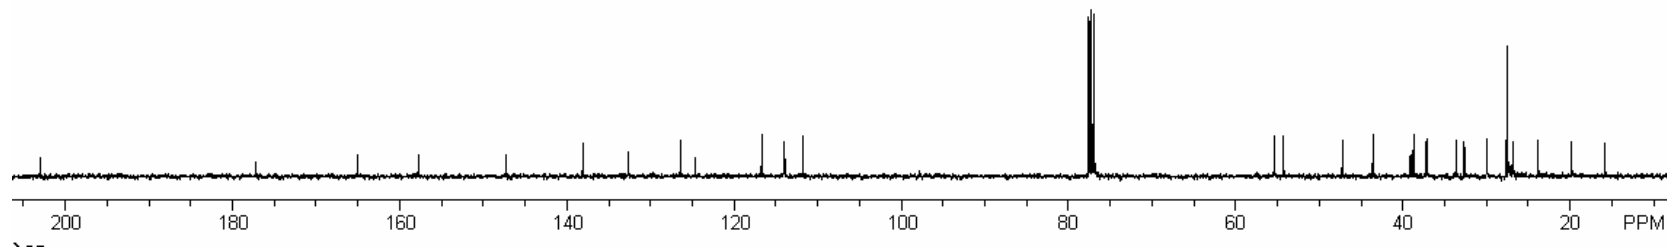

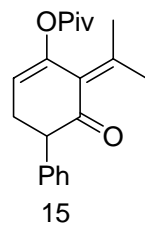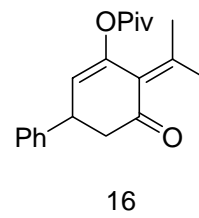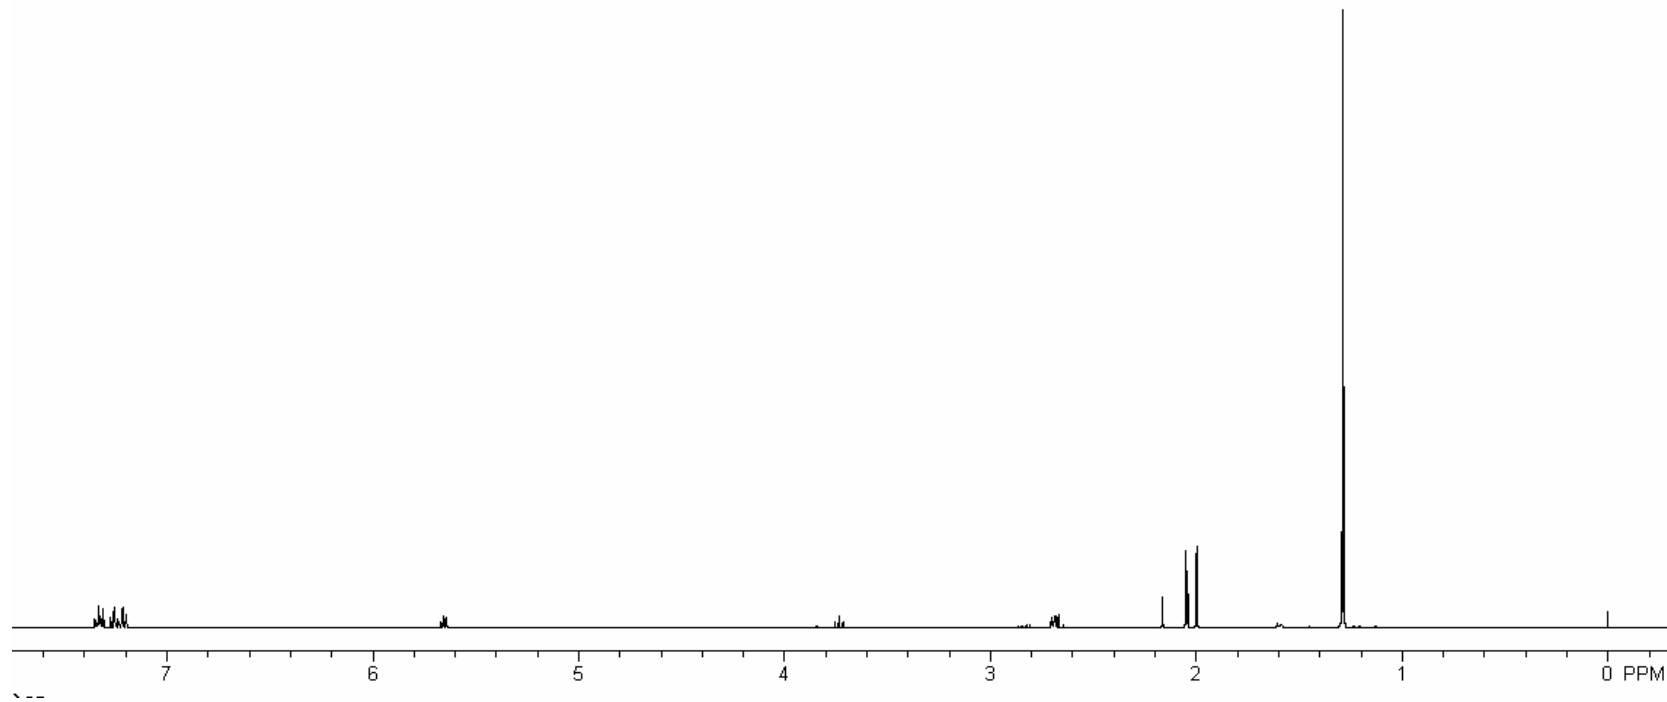

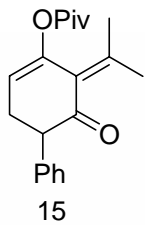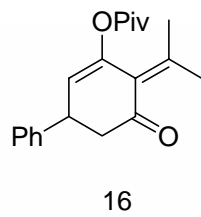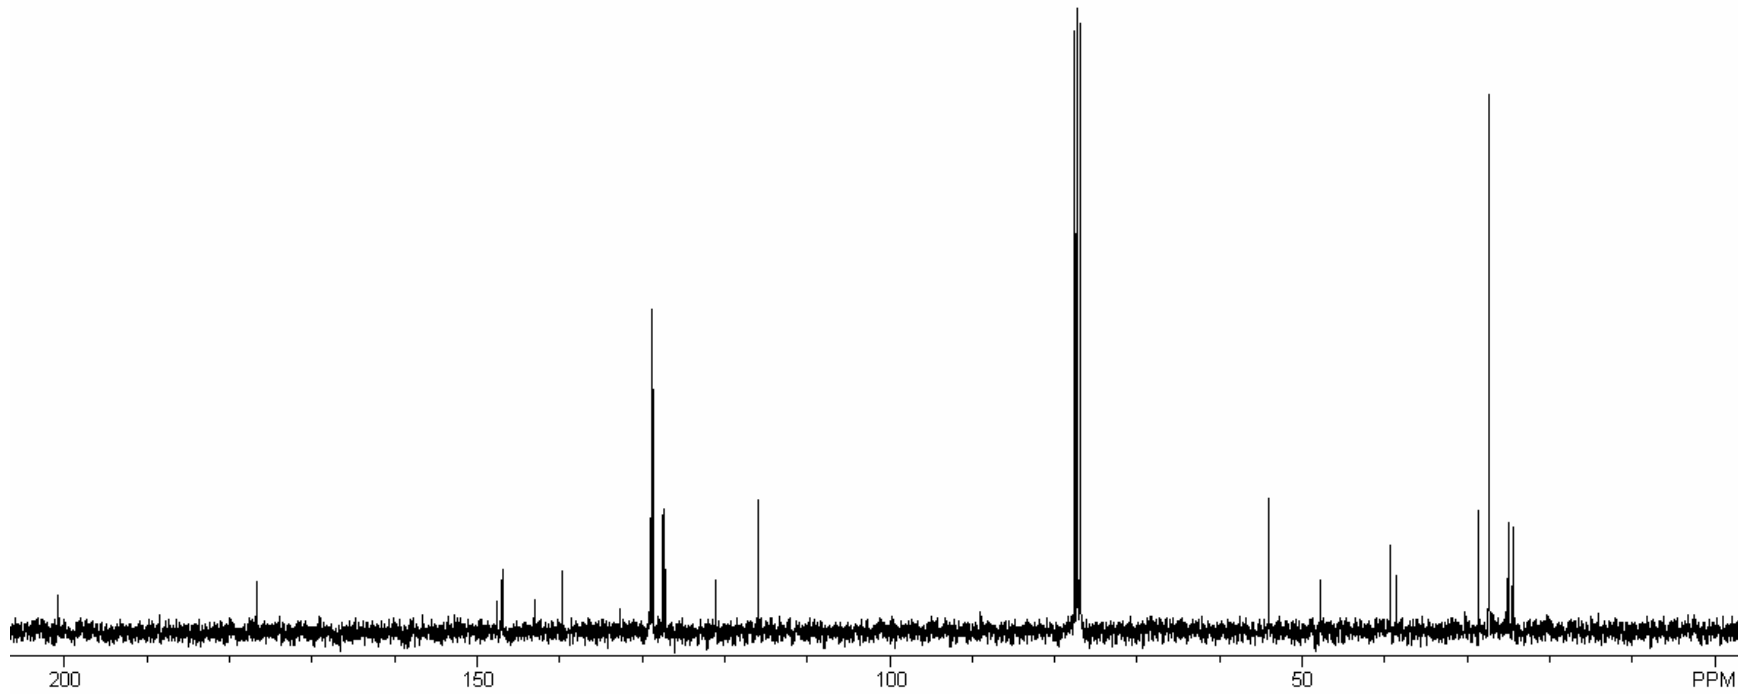

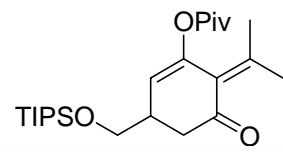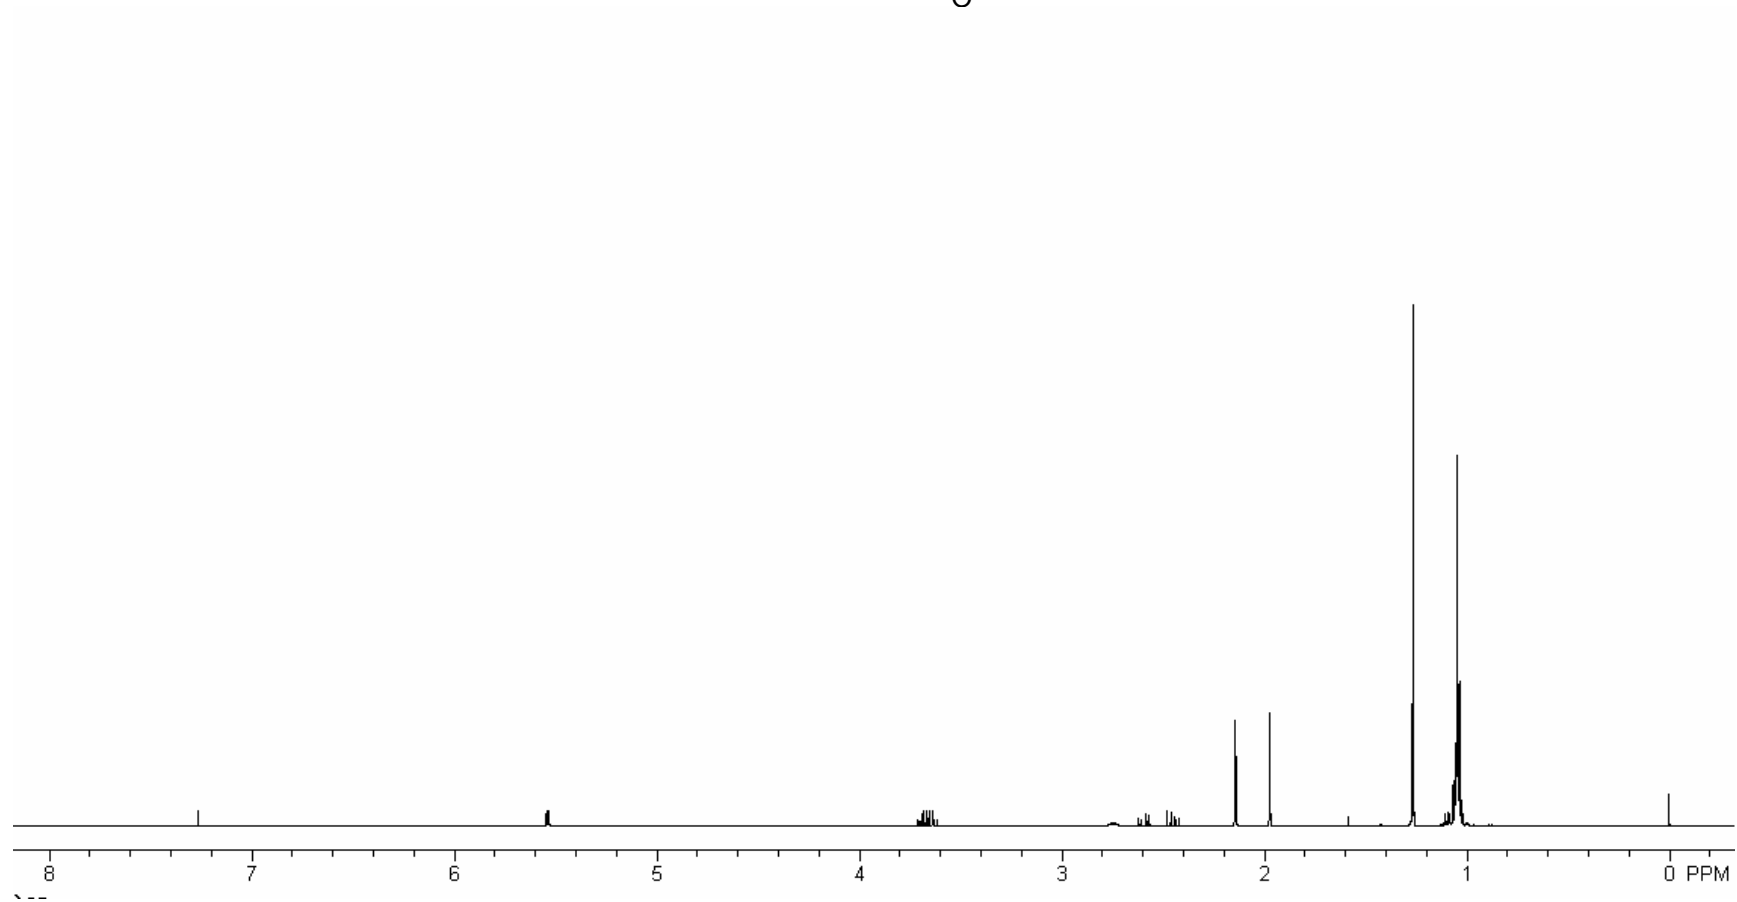

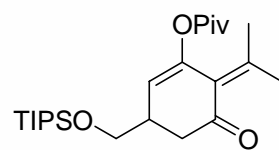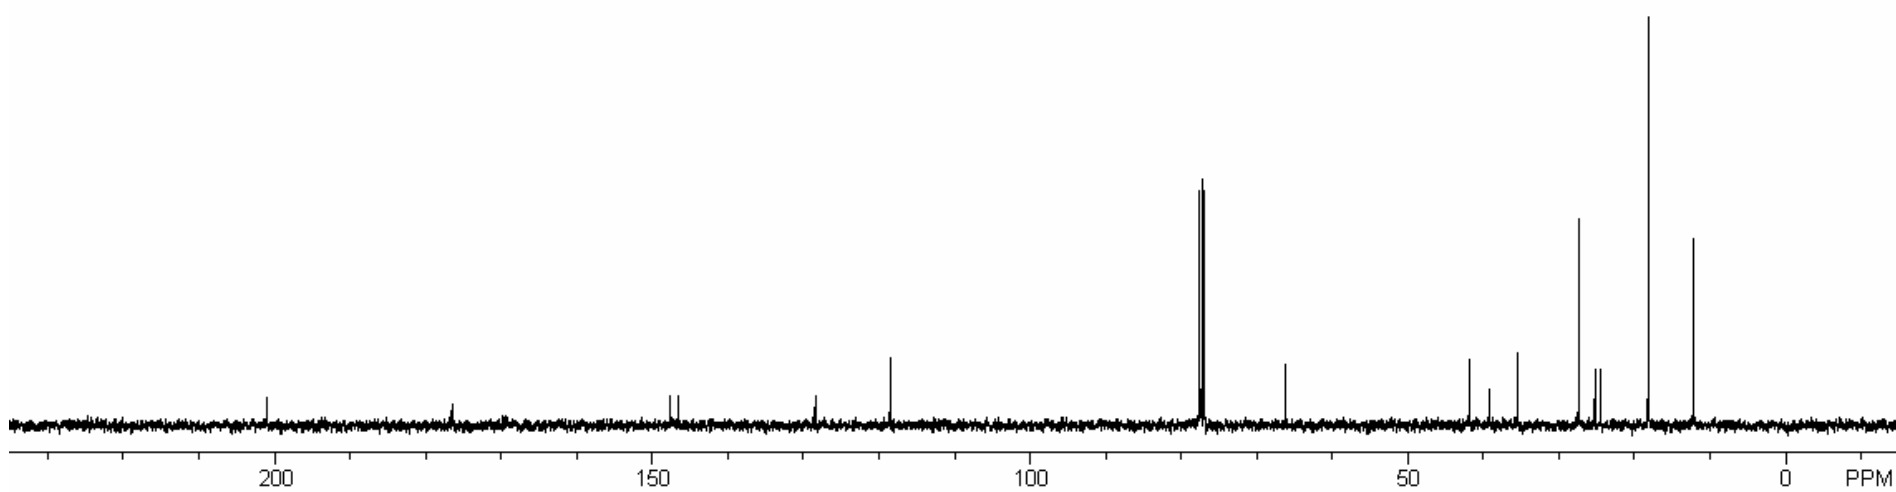

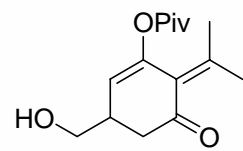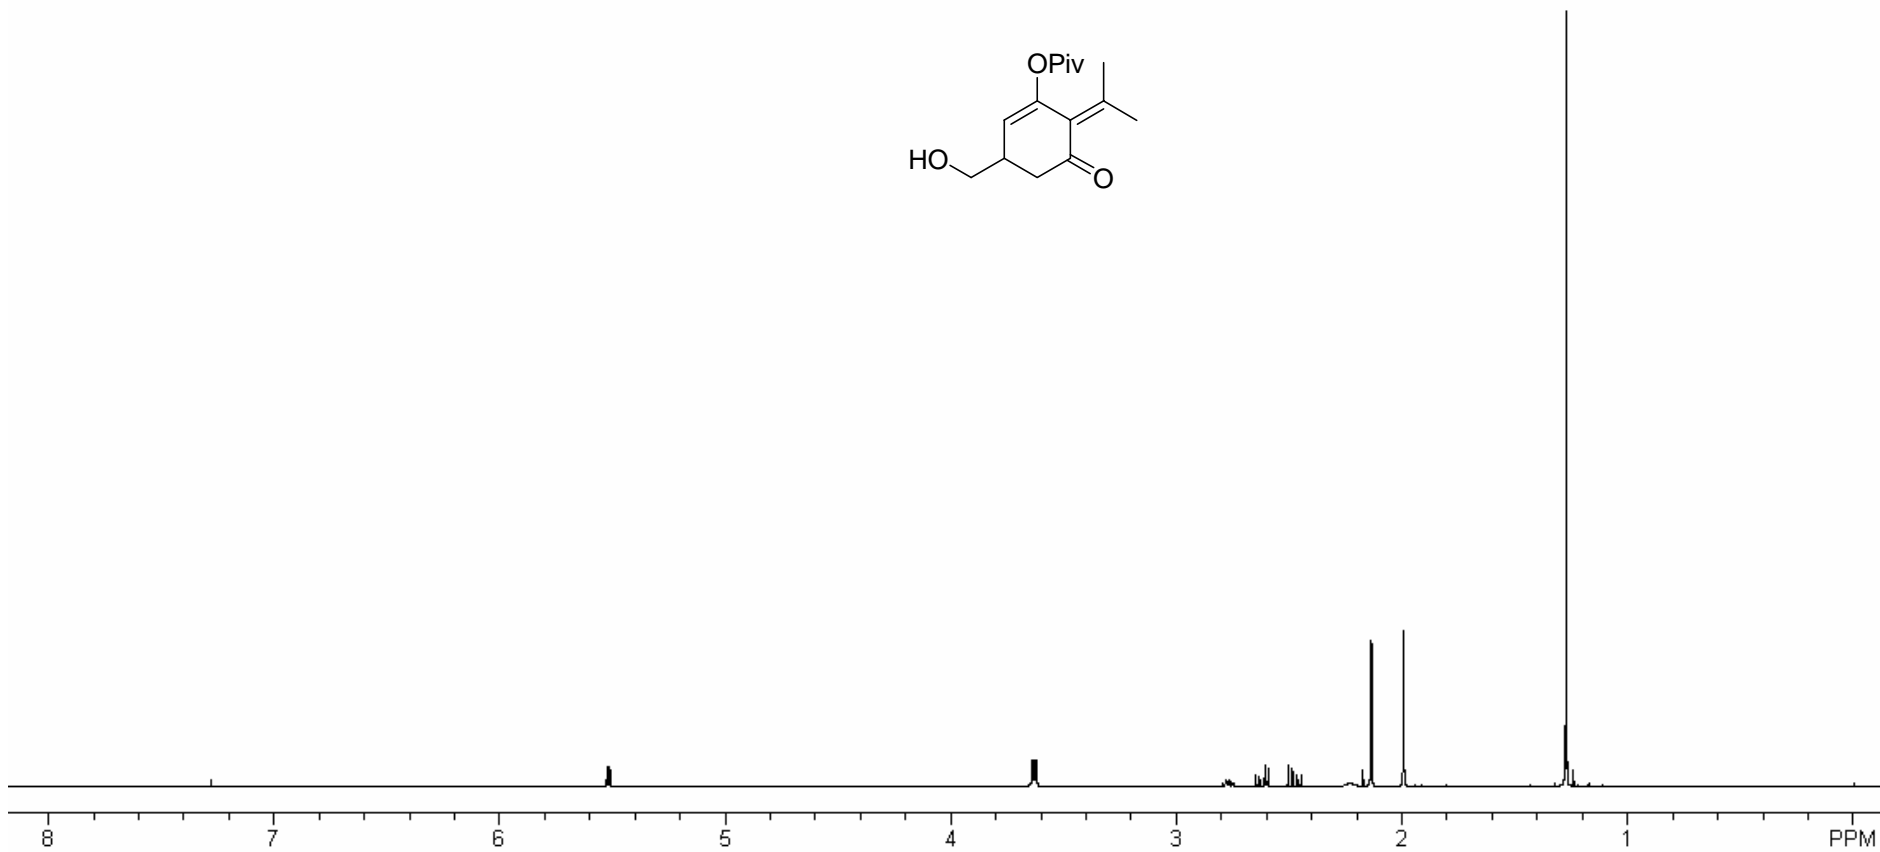

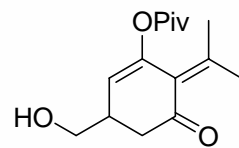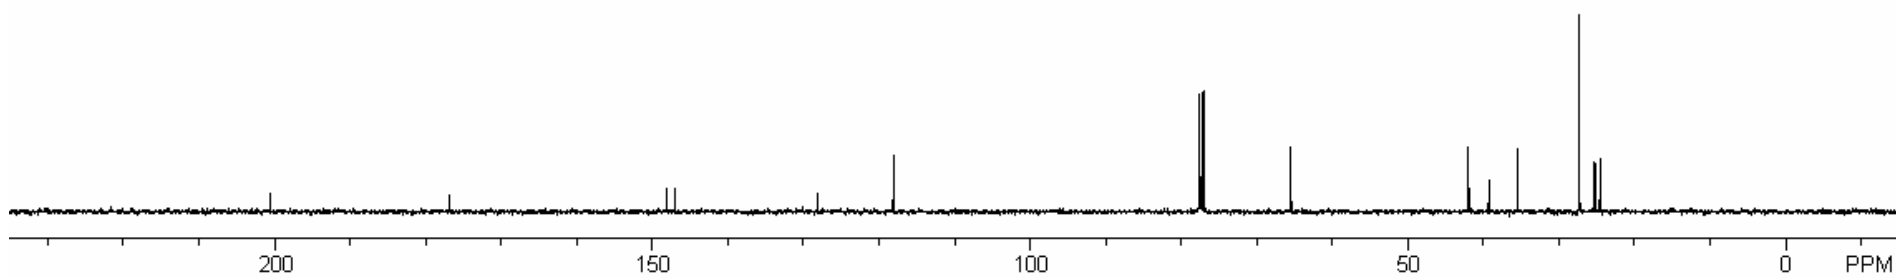



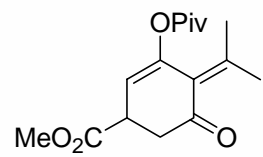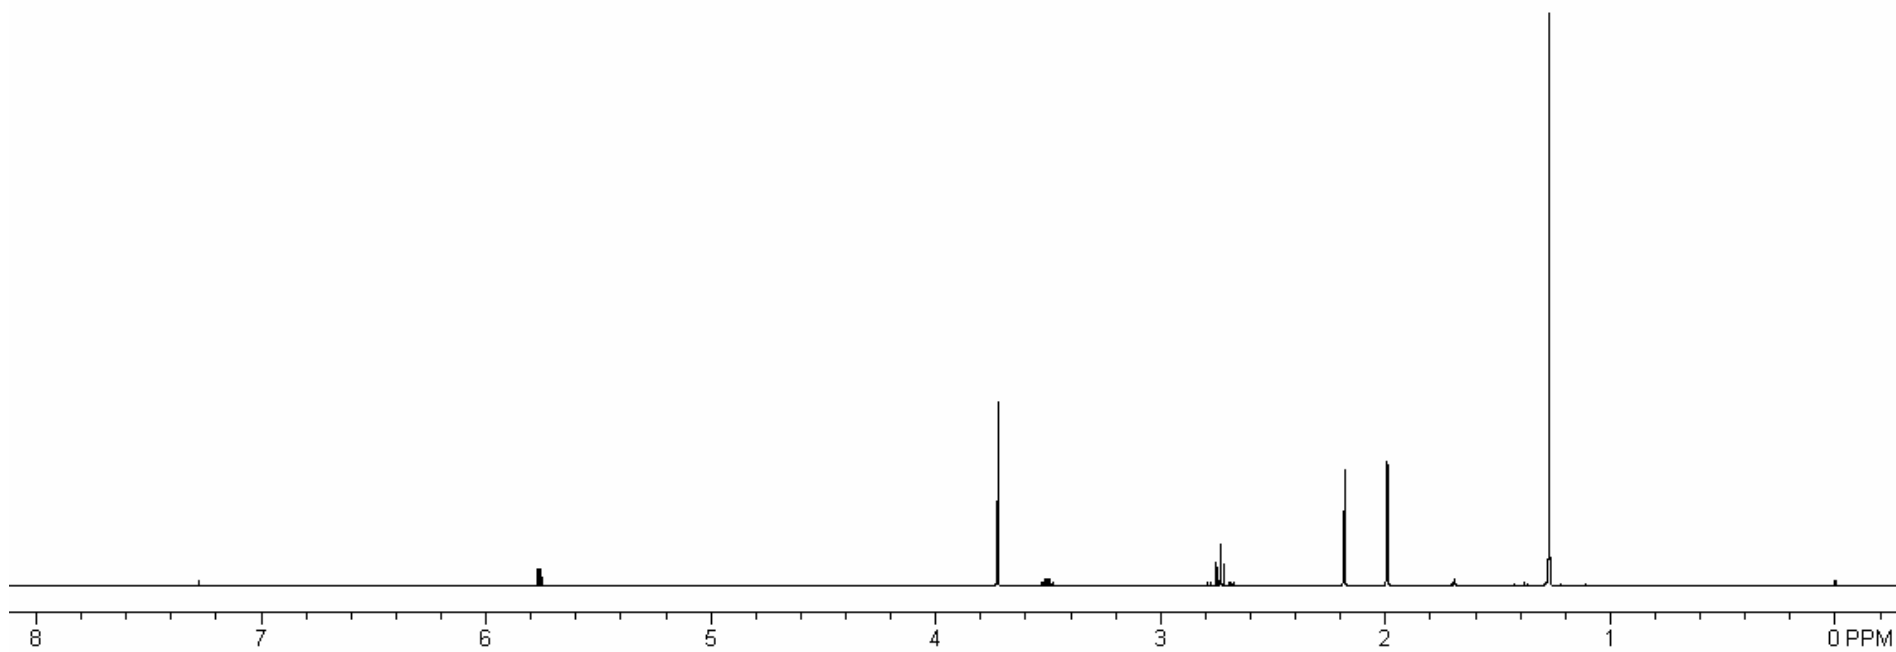

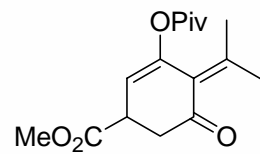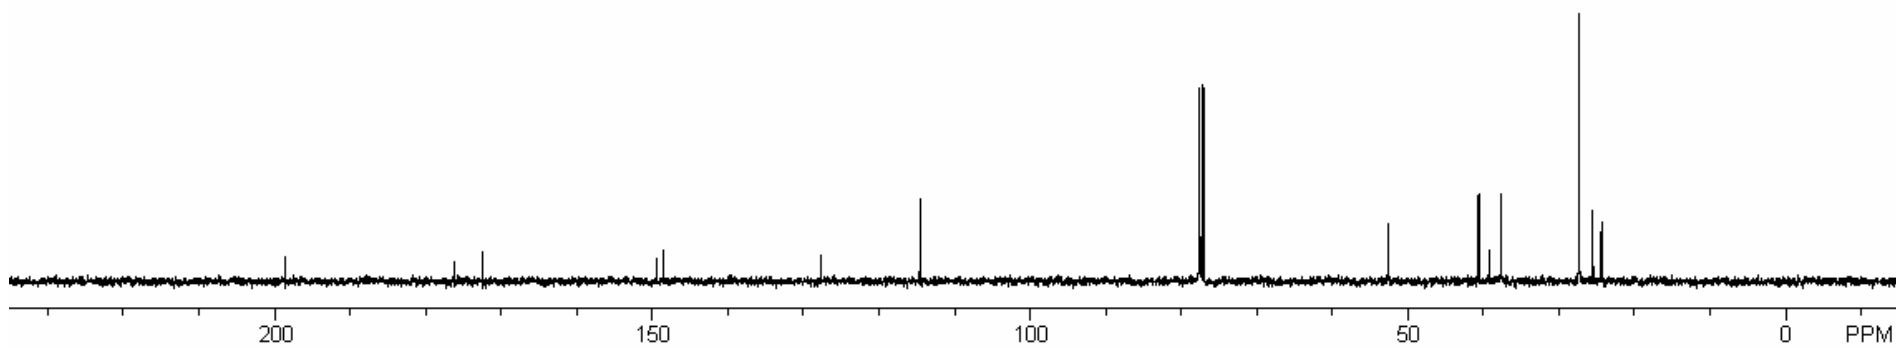

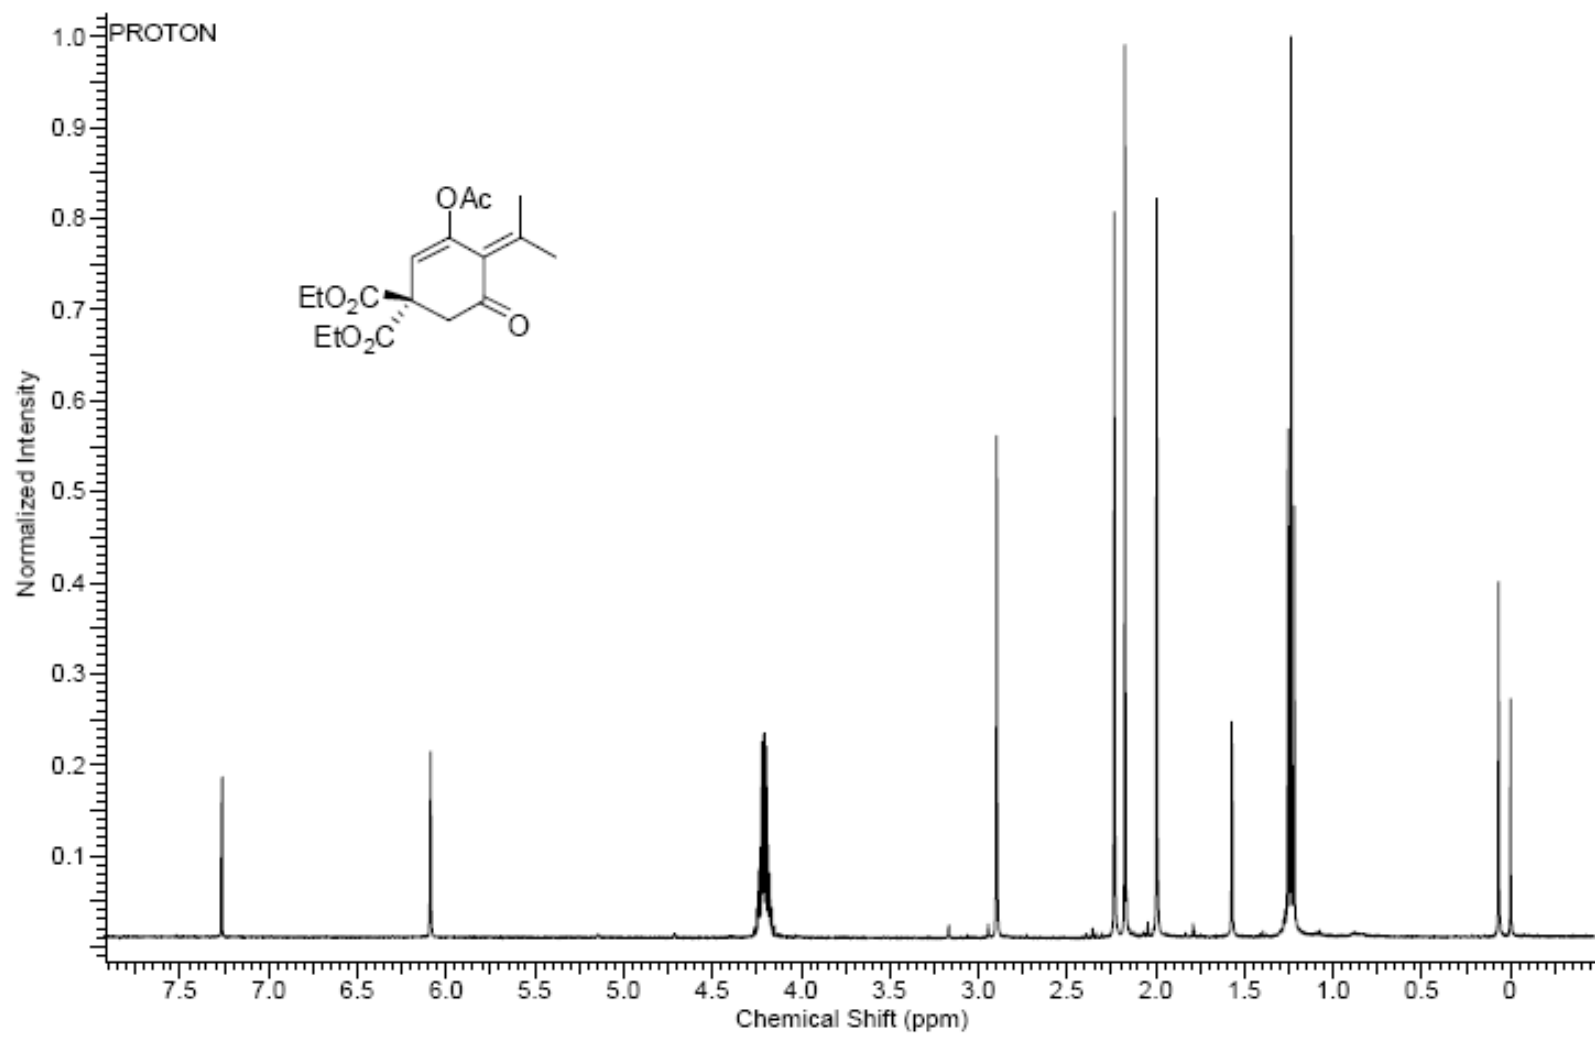

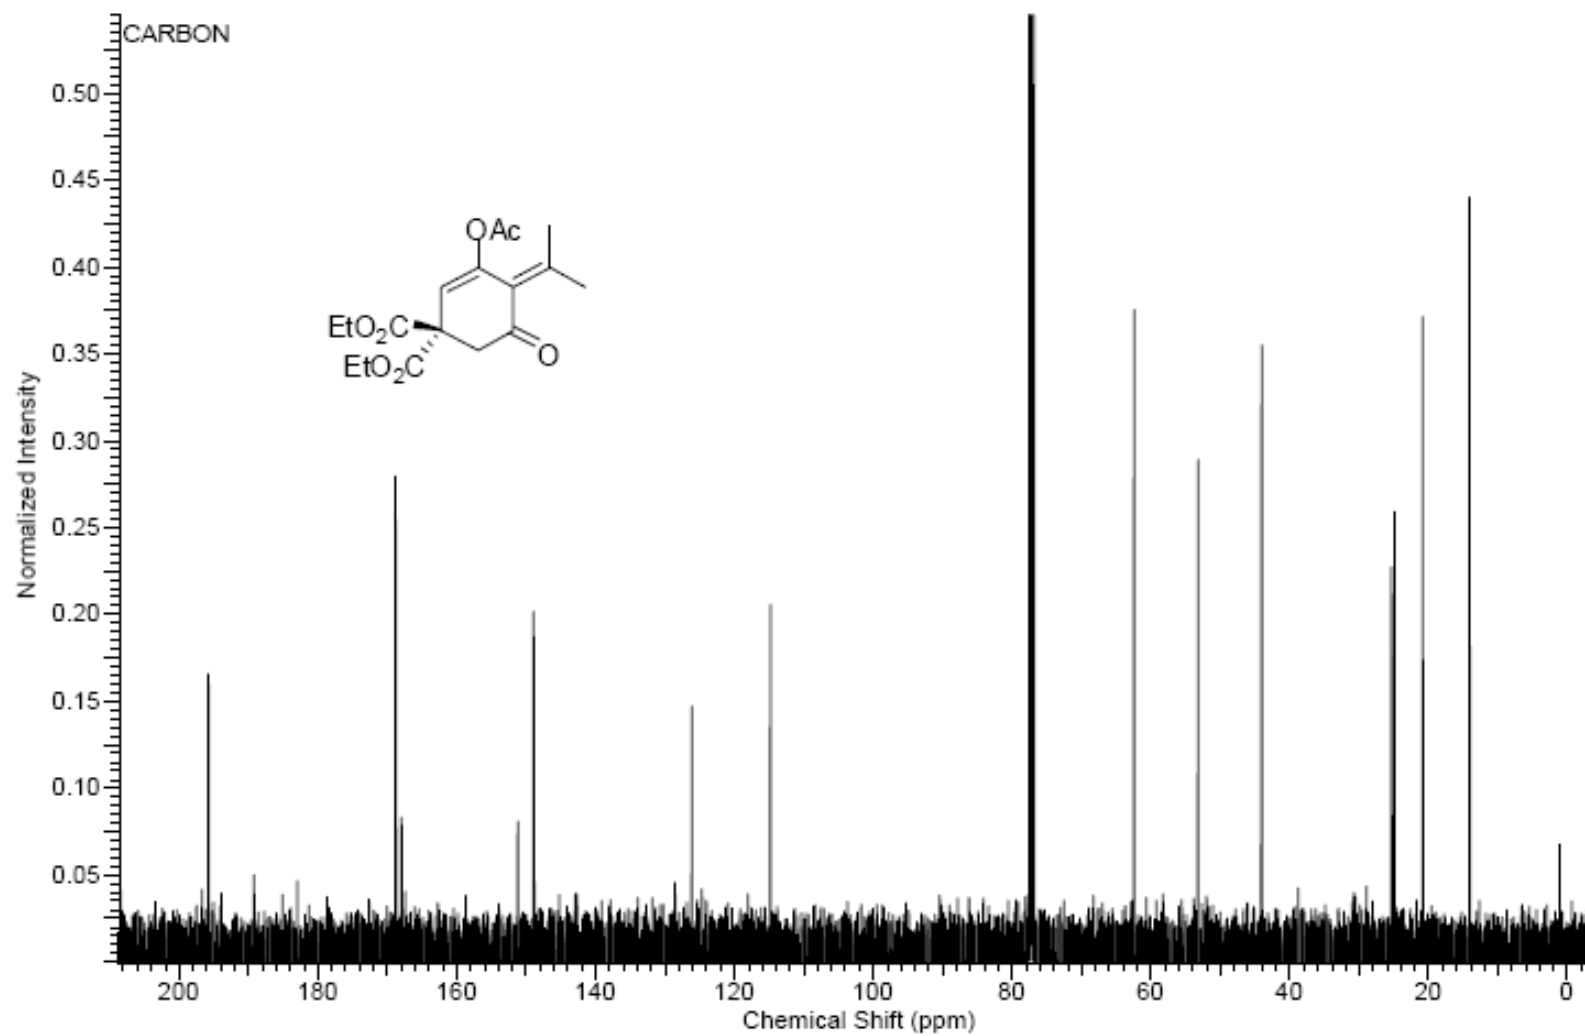

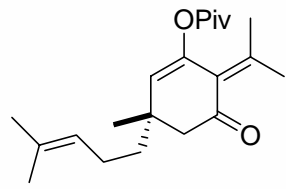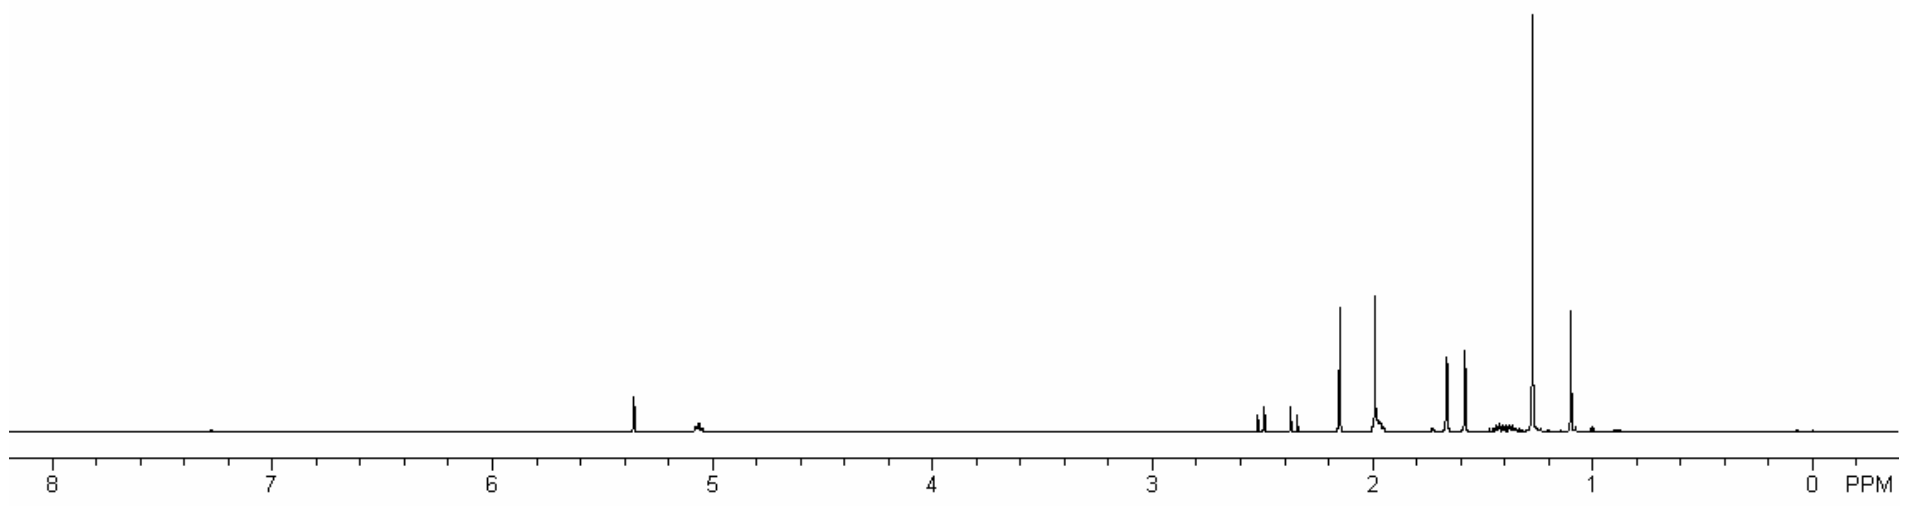

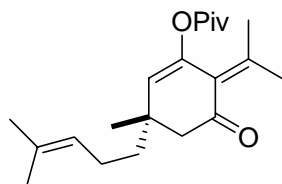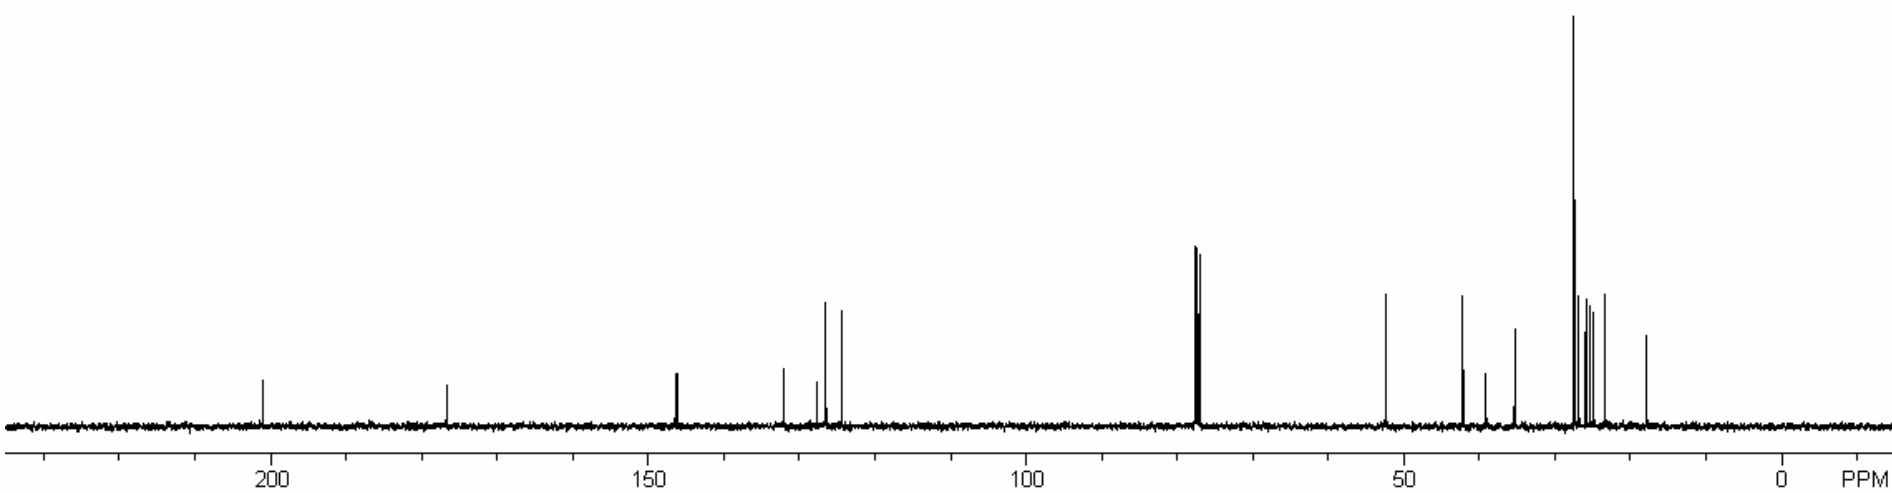

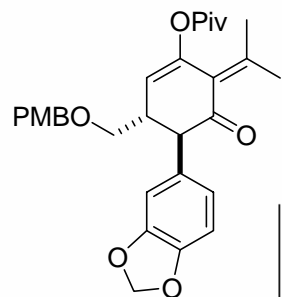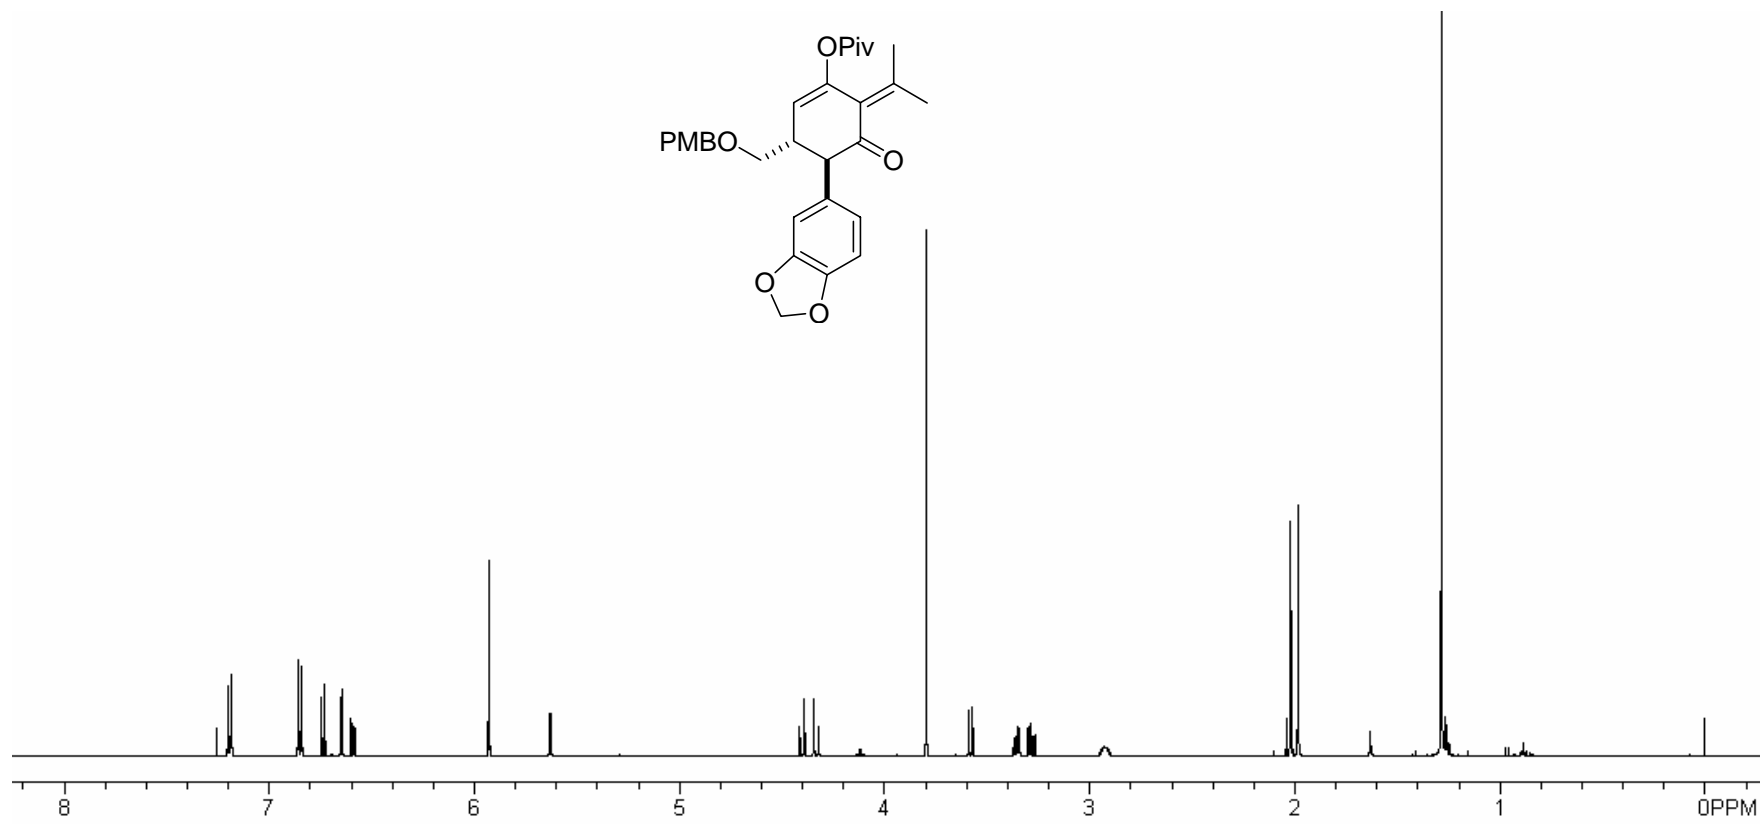

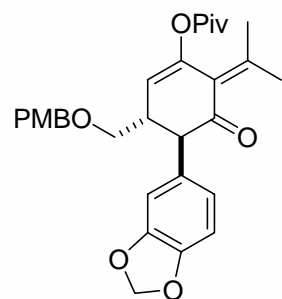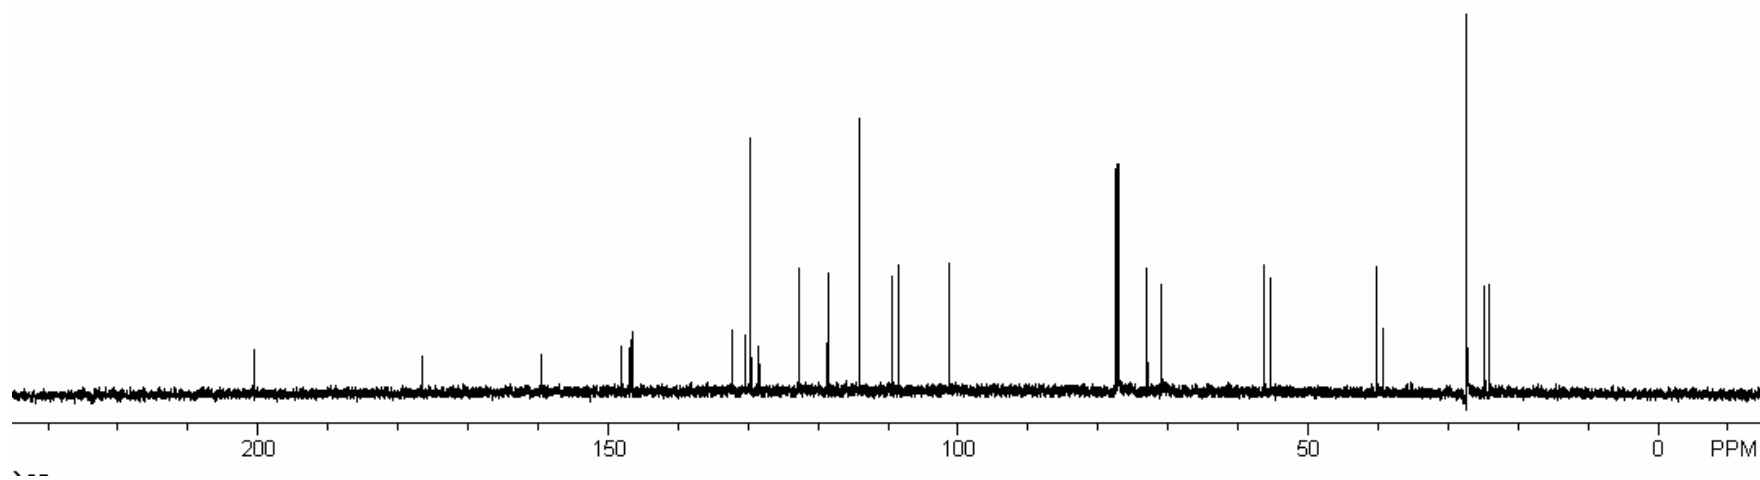



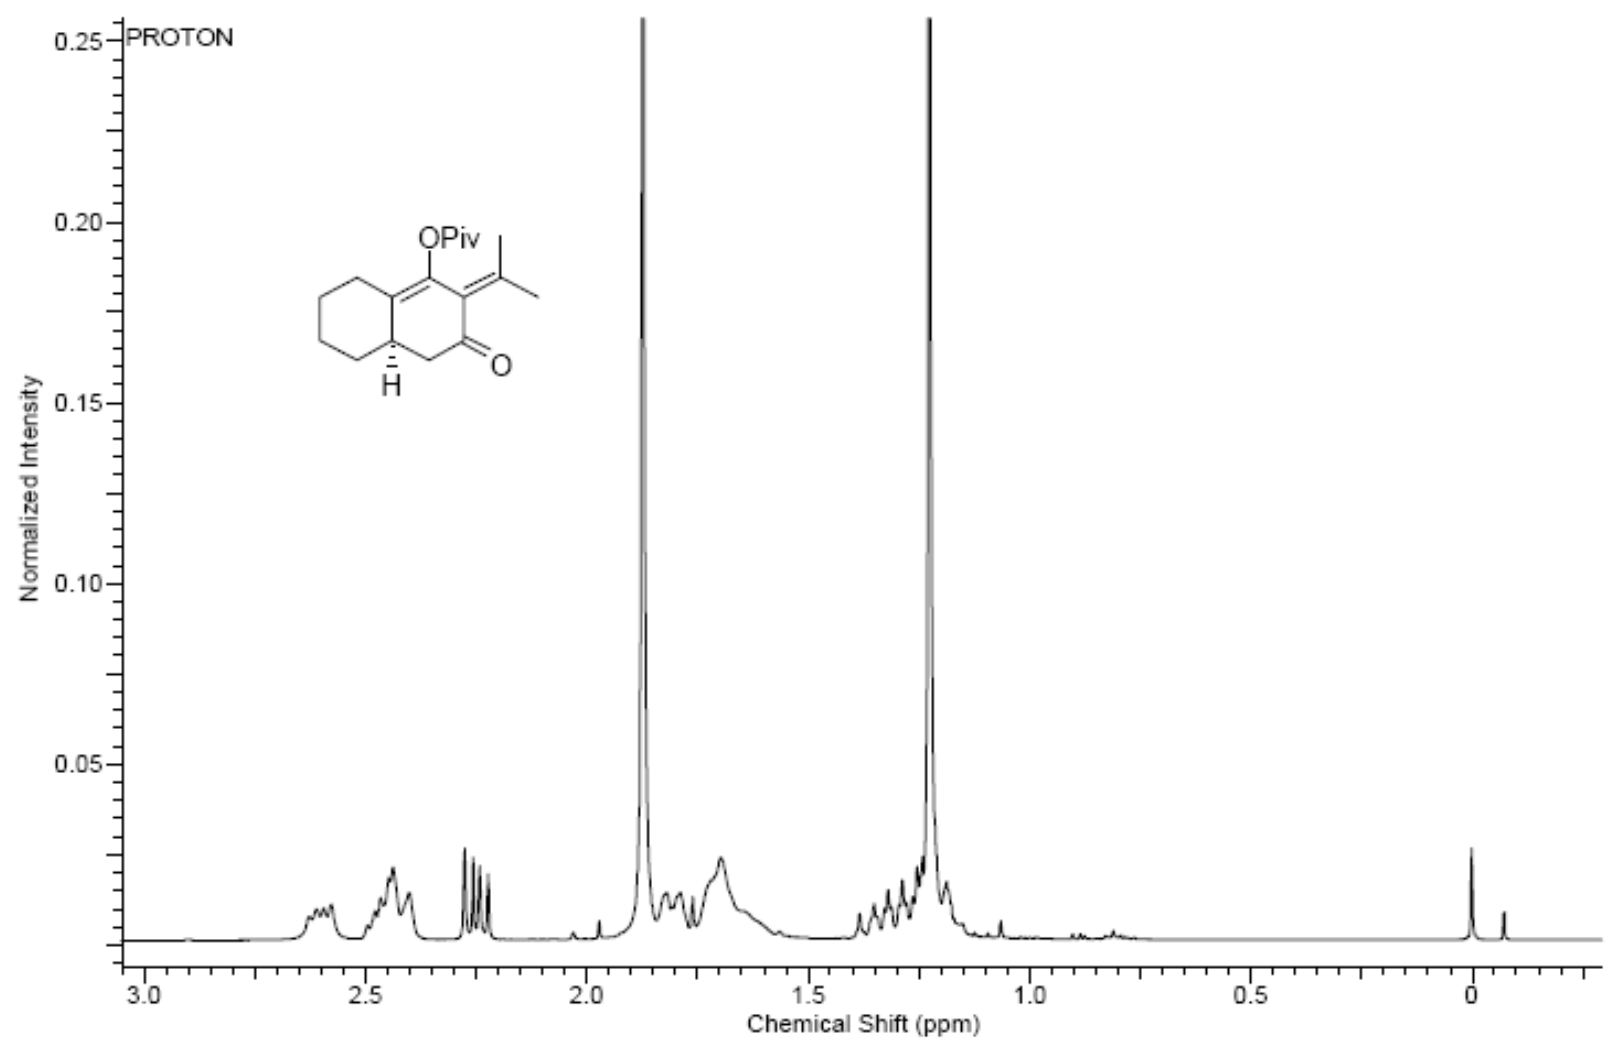



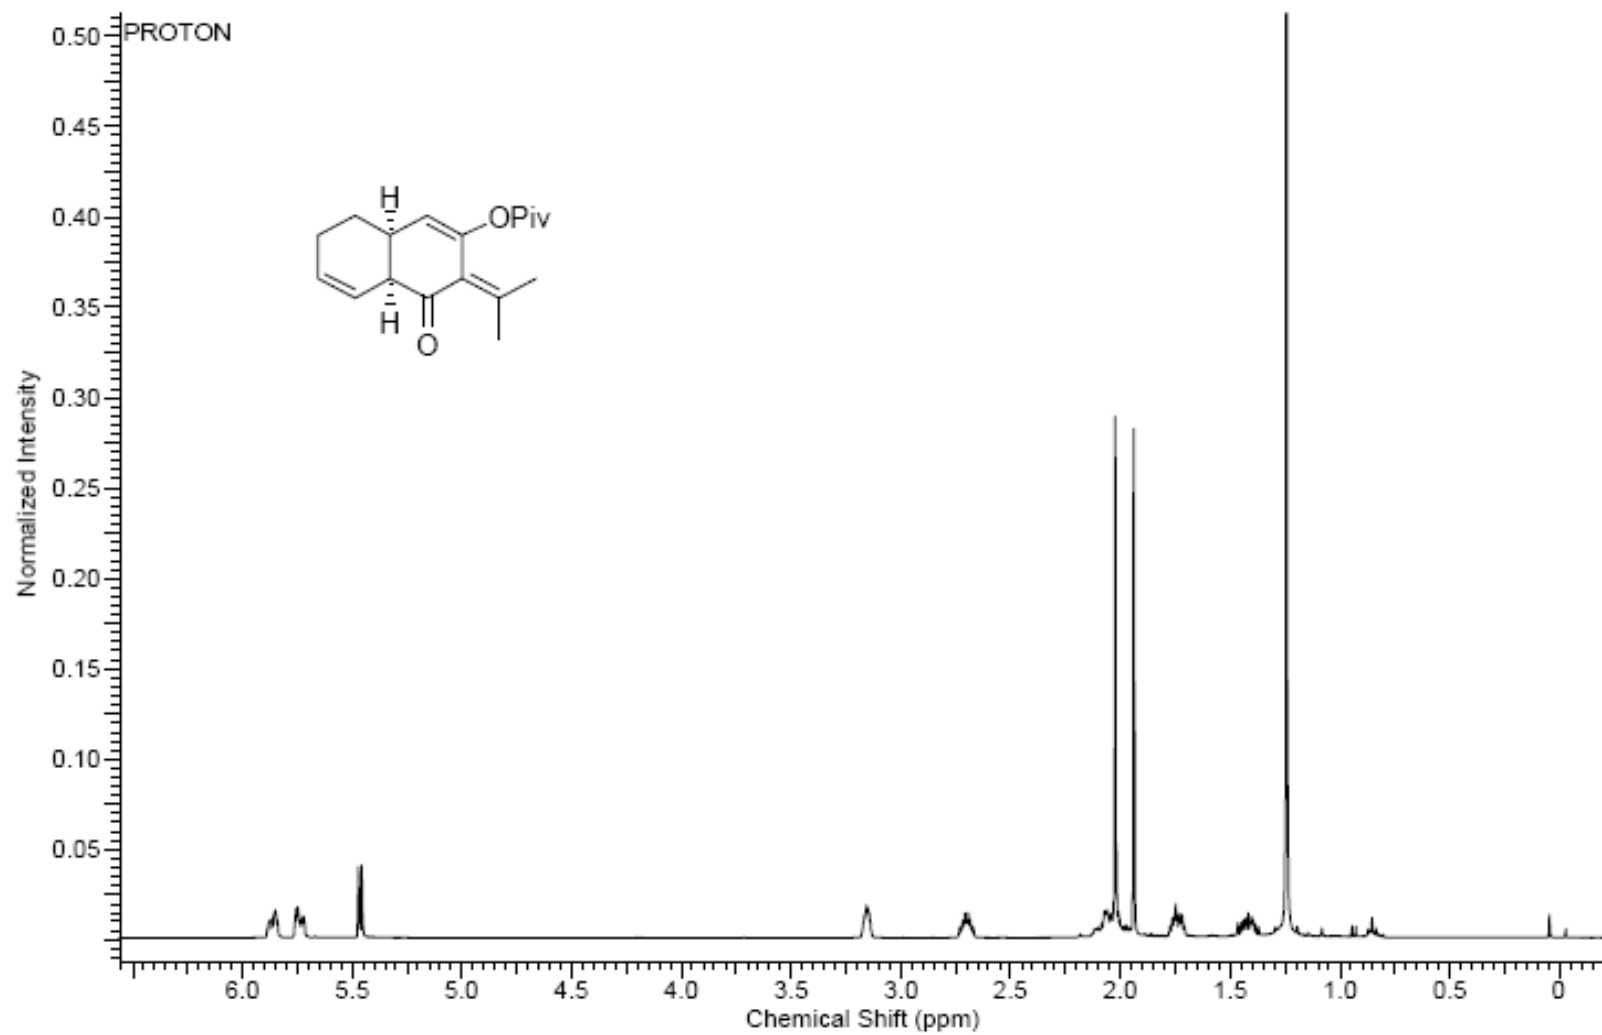

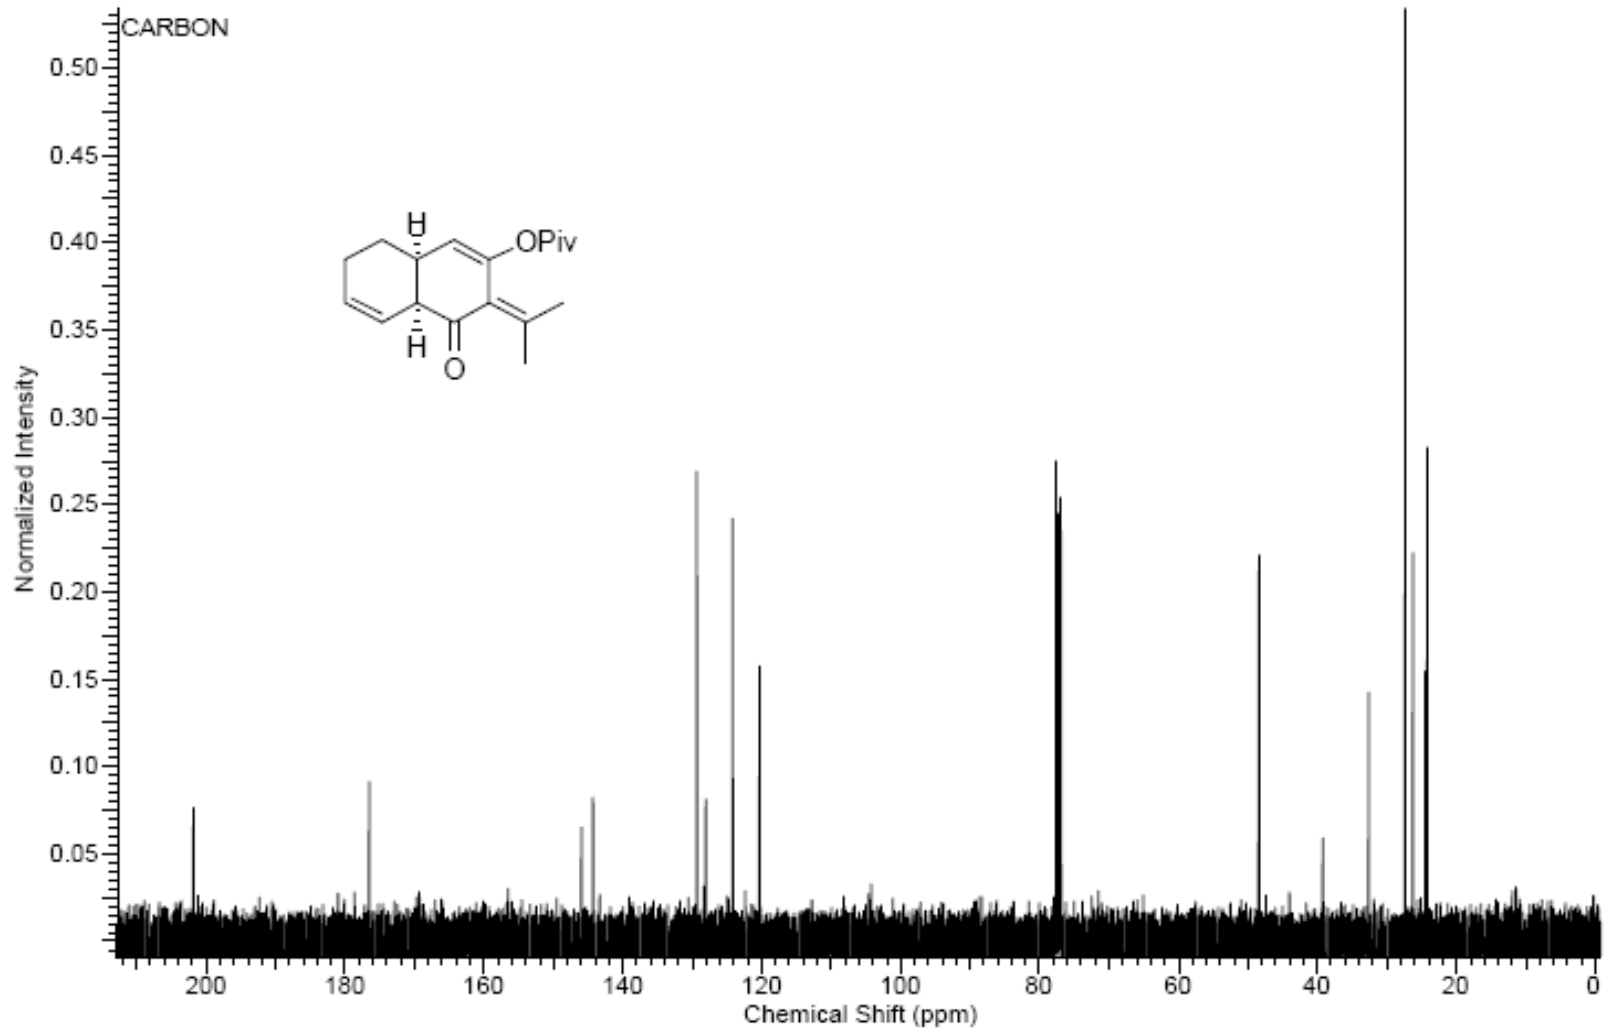

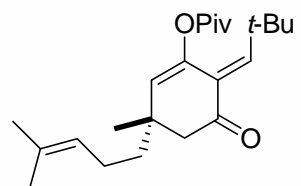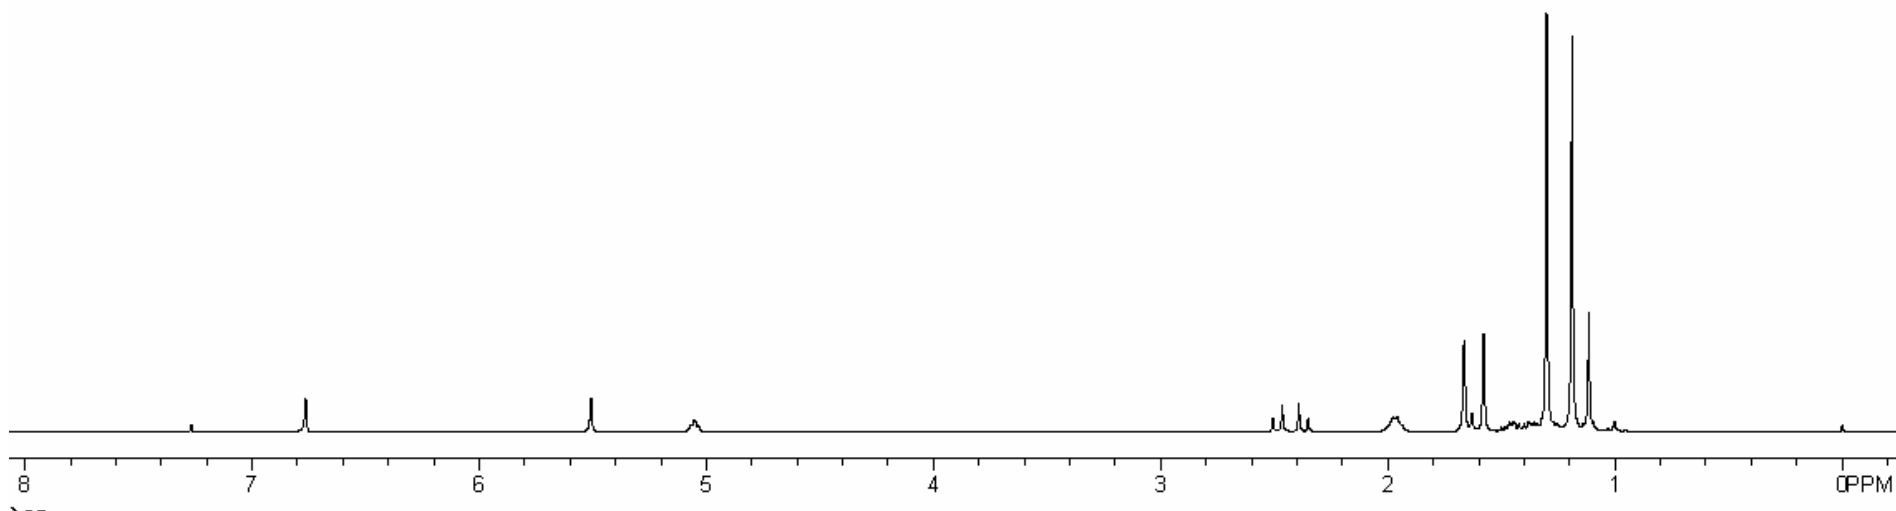

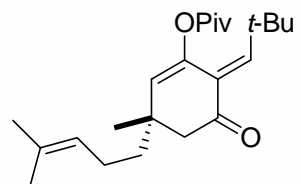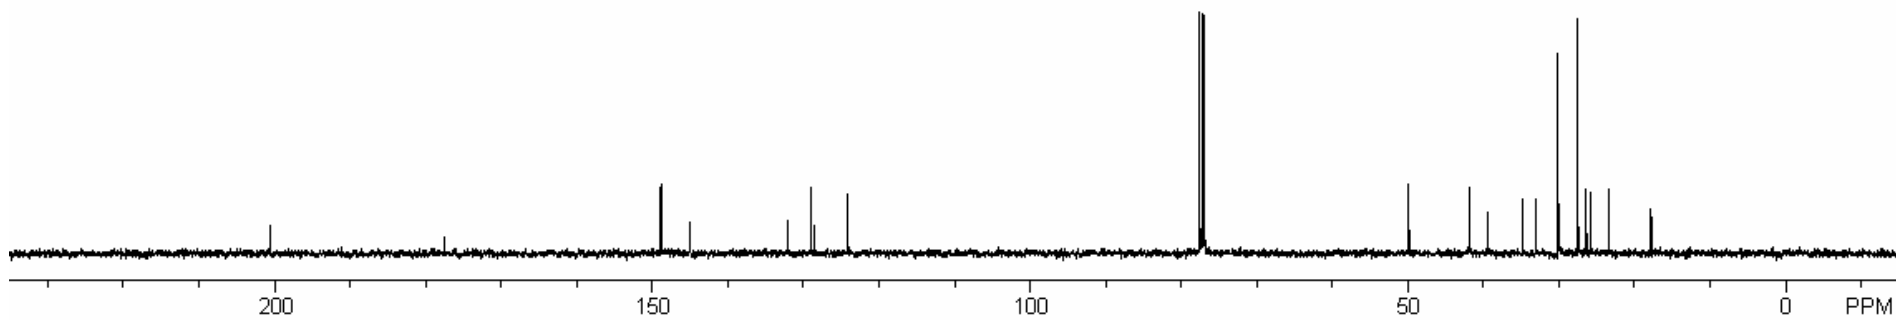

Supplement: NIHMS303923-supplement-Supporting_Information.pdf [file NIHMS303923-supplement-Supporting_Information.pdf]
